# Supplementary material
Source: Royal Society of Chemistry journal article supplement (doi:10.1039/d5cp04478b)
Supplement: d5cp04478b1.pdf [file d5cp04478b1.pdf]

## Supplementary Materials

# Kinetics and General Reaction Rules for Hydrogen Atom Abstraction Reactions from C4–C7 Oxygenated Fuels by Hydroxyl Radical

*Ying Huo<sup>a</sup>, Yachao Chang<sup>a,\*</sup>, Lili Ye<sup>b</sup>, Ming Jia<sup>a,\*</sup>*

<sup>a</sup> Key Laboratory of Ocean Energy Utilization and Energy Conservation of Ministry of Education, Dalian  
University of Technology, Dalian, Liaoning 116024, P.R. China

<sup>b</sup> School of Chemical Engineering, Dalian University of Technology, Dalian, Liaoning 116024, P.R.  
China

## S1 Relative energies of the H-abstraction reactions

**Table S1.** Relative energies of the H-abstraction reactions of  $C_nH_{2n+1}COOCH_3$  ( $n = 2-3$ ),  $C_nH_{2n+1}C(O)CH_3$  ( $n = 2-3$ ),  $C_nH_{2n+1}OCH_3$  ( $n = 3-4$ ), and  $C_nH_{2n+1}CHO$  ( $n = 3-4$ ) with  $\dot{H}O$  using the M062x/6-311++G (d, p) and CCSD(T) methods

| Molecular system   | M06-2x<br>(kcal/mol) | CCSD(T)<br>(kcal/mol) | Difference<br>(kcal/mol) | Molecular system | M06-2x<br>(kcal/mol) | CCSD(T)<br>(kcal/mol) | Difference<br>(kcal/mol) |
|--------------------|----------------------|-----------------------|--------------------------|------------------|----------------------|-----------------------|--------------------------|
| $C_2H_5COOCH_3+OH$ | 0.00                 | 0.00                  | 0.00                     | EP1'             | -22.54               | -21.91                | 0.63                     |
| ER1                | -4.48                | -3.28                 | 1.20                     | EP1              | -22.54               | -21.91                | 0.63                     |
| ER2                | -6.50                | -4.78                 | 1.72                     | EP2              | -28.81               | -28.21                | 0.60                     |
| ER3                | -4.58                | -3.19                 | 1.39                     | EP3              | -20.97               | -20.67                | 0.30                     |
| ER4                | -6.58                | -4.90                 | 1.68                     | EP3'             | -17.48               | -17.43                | 0.05                     |
| TS1'               | 3.25                 | 4.10                  | 0.85                     | P1'              | -18.19               | -19.82                | 1.63                     |
| TS1                | -0.43                | 0.56                  | 0.99                     | P1               | -18.20               | -19.83                | 1.63                     |
| TS2                | 0.38                 | 1.07                  | 0.69                     | P2               | -24.45               | -25.21                | 0.76                     |
| TS3                | -0.60                | 0.45                  | 1.05                     | P3               | -16.13               | -17.65                | 1.52                     |
| TS3'               | 2.65                 | 2.88                  | 0.23                     | P3'              | -15.03               | -16.27                | 1.24                     |
| $C_3H_7COOCH_3+OH$ | 0.00                 | 0.00                  | 0.00                     | EP1              | -22.56               | -21.95                | 0.61                     |
| ER1                | -4.49                | -3.32                 | 1.17                     | EP2              | -28.29               | -27.62                | 0.97                     |
| ER2                | -6.51                | -4.81                 | 1.70                     | EP3              | -24.63               | -23.47                | 1.16                     |
| ER3                | -4.60                | -3.25                 | 1.35                     | EP4              | -19.87               | -19.67                | 0.20                     |
| ER4                | -6.72                | -5.04                 | 1.68                     | EP4'             | -18.27               | -18.54                | 0.27                     |
| TS1'               | 3.21                 | 4.06                  | 0.85                     | P1'              | -18.19               | -19.83                | 1.64                     |
| TS1                | -0.42                | 0.56                  | 0.98                     | P1               | -18.19               | -19.83                | 1.64                     |
| TS2                | 0.15                 | 0.73                  | 0.58                     | P2               | -23.94               | -24.59                | 0.65                     |
| TS3                | -2.40                | -1.57                 | 0.83                     | P3               | -19.38               | -20.46                | 1.08                     |
| TS4                | 1.54                 | 2.01                  | 0.47                     | P4               | -16.57               | -18.05                | 1.48                     |
| TS4'               | 2.34                 | 2.65                  | 0.31                     | P4'              | -16.27               | -17.68                | 1.41                     |
| EP1'               | -22.56               | -21.95                | 0.61                     |                  |                      |                       |                          |
| $C_3H_7OCH_3+OH$   | 0.00                 | 0.00                  | 0.00                     | EP2              | -27.24               | -26.30                | 0.94                     |
| ER1                | -6.74                | -5.31                 | 1.43                     | EP3              | -24.45               | -23.35                | 1.10                     |
| TS1'               | 1.52                 | 2.48                  | 0.96                     | EP4              | -19.37               | -19.41                | 0.04                     |
| TS1                | 0.44                 | 0.75                  | 0.31                     | EP4'             | -18.39               | -18.69                | 0.30                     |
| TS2                | -0.90                | -0.54                 | 0.36                     | P1'              | -21.19               | -23.11                | 1.92                     |
| TS3                | -1.80                | -0.76                 | 1.04                     | P1               | -21.18               | -23.10                | 1.92                     |
| TS4                | 1.74                 | 2.20                  | 0.46                     | P2               | -22.58               | -24.05                | 1.47                     |
| TS4'               | 2.44                 | 2.79                  | 0.35                     | P3               | -18.50               | -19.78                | 1.28                     |
| EP1'               | -25.79               | -25.79                | 0.00                     | P4               | -16.61               | -18.06                | 1.45                     |
| EP1                | -25.80               | -25.79                | 0.01                     | P4'              | -16.51               | -17.91                | 1.40                     |
| $C_4H_9OCH_3+OH$   | 0.00                 | 0.00                  | 0.00                     | EP3              | -25.37               | -23.88                | 1.49                     |
| ER1                | -6.76                | -5.38                 | 1.38                     | EP4              | -22.81               | -22.47                | 0.34                     |
| TS1'               | 1.54                 | 2.48                  | 0.94                     | EP5              | -19.41               | -19.21                | 0.20                     |
| TS1                | 0.41                 | 0.72                  | 0.31                     | EP5'             | -18.72               | -19.01                | 0.29                     |
| TS2                | -0.87                | -0.54                 | 0.33                     | P1'              | -21.17               | -23.09                | 1.92                     |

Table S1 Continue

| Molecular system                                      | M06-2x<br>(kcal/mol) | CCSD(T)<br>(kcal/mol) | Difference<br>(kcal/mol) | Molecular system | M06-2x<br>(kcal/mol) | CCSD(T)<br>(kcal/mol) | Difference<br>(kcal/mol) |
|-------------------------------------------------------|----------------------|-----------------------|--------------------------|------------------|----------------------|-----------------------|--------------------------|
| TS3                                                   | -2.01                | -1.08                 | 0.93                     | P1               | -21.17               | -23.09                | 1.92                     |
| TS4                                                   | 0.30                 | 0.62                  | 0.32                     | P2               | -22.64               | -24.09                | 1.45                     |
| TS5                                                   | 1.64                 | 2.15                  | 0.51                     | P3               | -18.21               | -19.44                | 1.23                     |
| TS5'                                                  | 2.18                 | 2.38                  | 0.20                     | P4               | -19.67               | -20.72                | 1.05                     |
| EP1'                                                  | -25.78               | -26.29                | 0.51                     | P5               | -16.54               | -18.04                | 1.50                     |
| EP1                                                   | -25.83               | -25.85                | 0.02                     | P5'              | -16.27               | -17.70                | 1.43                     |
| EP2                                                   | -26.59               | -26.66                | 0.07                     |                  |                      |                       |                          |
| C <sub>2</sub> H <sub>5</sub> C(O)CH <sub>3</sub> +OH | 0.00                 | 0.00                  | 0.00                     | EP2              | -32.85               | -31.48                | 1.37                     |
| ER1                                                   | -6.36                | -                     | -                        | EP3              | -21.43               | -19.92                | 1.51                     |
| ER2                                                   | -6.63                | -4.69                 | 1.94                     | EP3'             | -18.07               | -17.72                | 0.35                     |
| TS1                                                   | 1.09                 | 2.19                  | 1.10                     | P1               | -21.17               | -21.71                | 0.54                     |
| TS2                                                   | 0.66                 | 1.15                  | 0.49                     | P2               | -26.83               | -26.87                | 0.04                     |
| TS3                                                   | -0.73                | 0.65                  | 1.38                     | P3               | -16.19               | -17.43                | 1.24                     |
| TS3'                                                  | 2.30                 | 2.86                  | 0.56                     | P3'              | -15.33               | -16.31                | 0.98                     |
| EP1                                                   | -27.59               | -26.76                | 0.83                     |                  |                      |                       |                          |
| C <sub>3</sub> H <sub>7</sub> C(O)CH <sub>3</sub> +OH | 0.00                 | 0.00                  | 0.00                     | EP2              | -32.32               | -31.22                | 1.10                     |
| ER1                                                   | -6.39                | -                     | -                        | EP3              | -24.81               | -23.55                | 1.26                     |
| ER2                                                   | -6.81                | -5.15                 | 1.66                     | EP4              | -20.29               | -20.13                | 0.16                     |
| TS1                                                   | 1.01                 | 1.82                  | 0.81                     | EP4'             | -18.48               | -18.71                | 0.23                     |
| TS2                                                   | 0.27                 | 0.53                  | 0.26                     | P1               | -21.22               | -22.02                | 0.80                     |
| TS3                                                   | -2.53                | -1.64                 | 0.89                     | P2               | -26.28               | -26.49                | 0.21                     |
| TS4                                                   | 1.30                 | 1.81                  | 0.51                     | P3               | -19.42               | -20.51                | 1.09                     |
| TS4'                                                  | 2.21                 | 2.54                  | 0.33                     | P4               | -16.64               | -18.11                | 1.47                     |
| EP1                                                   | -27.72               | -27.17                | 0.55                     | P4'              | -16.47               | -17.88                | 1.41                     |
| C <sub>3</sub> H <sub>7</sub> CHO+OH                  | 0.00                 | 0.00                  | 0.00                     | EP2              | -33.79               | -32.20                | 1.59                     |
| ER1                                                   | -3.11                | -2.11                 | 1.00                     | EP3              | -24.66               | -23.39                | 1.27                     |
| ER2                                                   | -6.22                | -4.59                 | 1.63                     | EP4              | -20.14               | -19.91                | 0.23                     |
| TS1                                                   | -1.87                | -1.20                 | 0.67                     | EP4'             | -18.23               | -18.48                | 0.25                     |
| TS2                                                   | 1.15                 | 1.35                  | 0.20                     | P1               | -28.08               | -30.12                | 2.02                     |
| TS3                                                   | -1.97                | -1.11                 | 0.86                     | P2               | -27.43               | -27.49                | 0.06                     |
| TS4                                                   | 1.44                 | 1.97                  | 0.53                     | P3               | -19.59               | -20.70                | 1.11                     |
| TS4'                                                  | 2.39                 | 2.72                  | 0.33                     | P4               | -16.57               | -18.04                | 1.47                     |
| EP1                                                   | -31.67               | -32.21                | 0.54                     | P4'              | -16.37               | -17.77                | 1.40                     |
| C <sub>4</sub> H <sub>9</sub> CHO+OH                  | 0.00                 | 0.00                  | 0.00                     | EP3              | -25.52               | -24.30                | 1.22                     |
| ER1                                                   | -5.03                | -4.44                 | 0.59                     | EP4              | -23.51               | -22.96                | 0.55                     |
| ER2                                                   | -6.35                | -4.64                 | 1.71                     | EP5              | -19.79               | -19.41                | 0.38                     |
| TS1                                                   | -1.89                | -1.22                 | 0.67                     | EP5'             | -18.67               | -18.53                | 0.14                     |
| TS2                                                   | 1.05                 | 1.26                  | 0.21                     | P1               | -28.08               | -30.13                | 2.05                     |
| TS3                                                   | -2.31                | -1.49                 | 0.82                     | P2               | -27.65               | -27.70                | 0.05                     |
| TS4                                                   | -0.10                | 0.31                  | 0.41                     | P3               | -19.22               | -20.32                | 1.10                     |
| TS5                                                   | 1.55                 | 2.08                  | 0.53                     | P4               | -19.64               | -20.72                | 1.08                     |

**Table S1** Continue

| Molecular system | M06-2x<br>(kcal/mol) | CCSD(T)<br>(kcal/mol) | Difference<br>(kcal/mol) | Molecular system | M06-2x<br>(kcal/mol) | CCSD(T)<br>(kcal/mol) | Difference<br>(kcal/mol) |
|------------------|----------------------|-----------------------|--------------------------|------------------|----------------------|-----------------------|--------------------------|
| TS5'             | 2.15                 | 2.35                  | 0.20                     | P5               | -16.50               | -18.00                | 1.50                     |
| EP1              | -31.70               | -32.26                | 0.56                     | P5'              | -16.25               | -17.68                | 1.43                     |
| EP2              | -34.92               | -32.88                | 2.04                     |                  |                      |                       |                          |

**Table S2.** Mean absolute errors (MAE) and maximum deviations for energy barriers and reaction energies compared to CCSD(T)/CBS benchmark

| Fuel class        | Energy type     | MAE (kcal/mol) | Max deviation (kcal/mol) |
|-------------------|-----------------|----------------|--------------------------|
| Esters (C4-C5)    | Energy barrier  | 0.71           | 1.05                     |
|                   | Reaction energy | 1.33           | 1.64                     |
| Ethers (C4-C5)    | Energy barrier  | 0.54           | 1.04                     |
|                   | Reaction energy | 1.53           | 1.92                     |
| Ketones (C4-C5)   | Energy barrier  | 0.70           | 1.38                     |
|                   | Reaction energy | 0.86           | 1.47                     |
| Aldehydes (C4-C5) | Energy barrier  | 0.49           | 0.86                     |
|                   | Reaction energy | 1.21           | 2.05                     |
| Overall           | Energy barrier  | 0.69           | 1.38                     |
|                   | Reaction energy | 1.26           | 2.05                     |

## S2 Related structures of intermolecular interaction

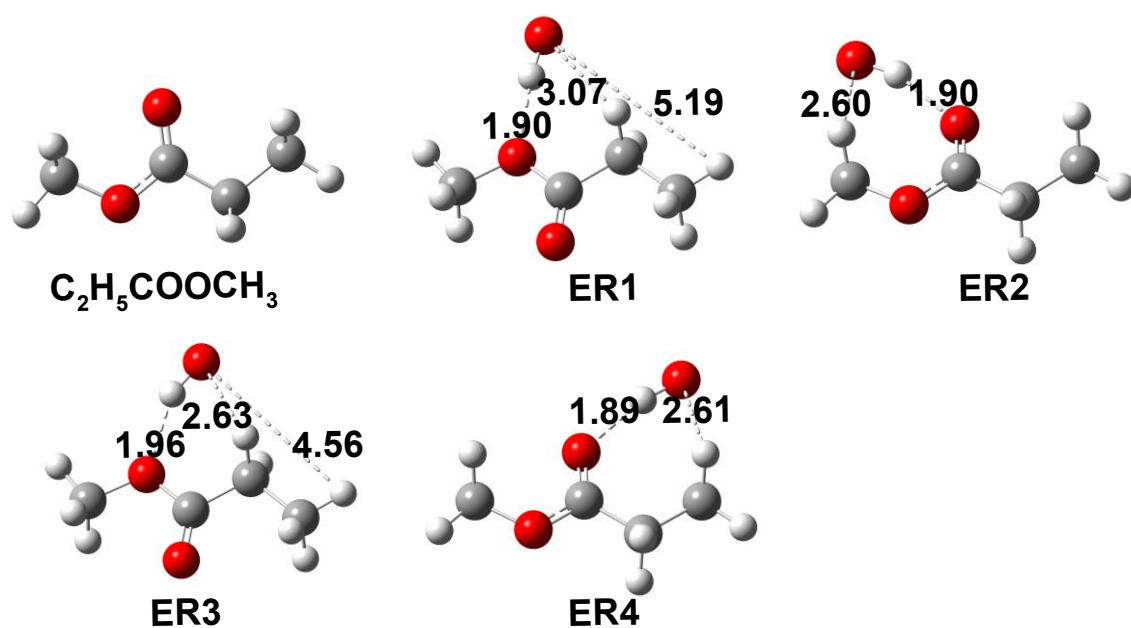

**Figure S1.** Geometries of the stable structures of  $C_2H_5COOCH_3$  and the reactant complexes involved in the reactions of  $C_2H_5COOCH_3$  with  $H\dot{O}$  optimized at the M06-2X/6-311++G (d, p) level.

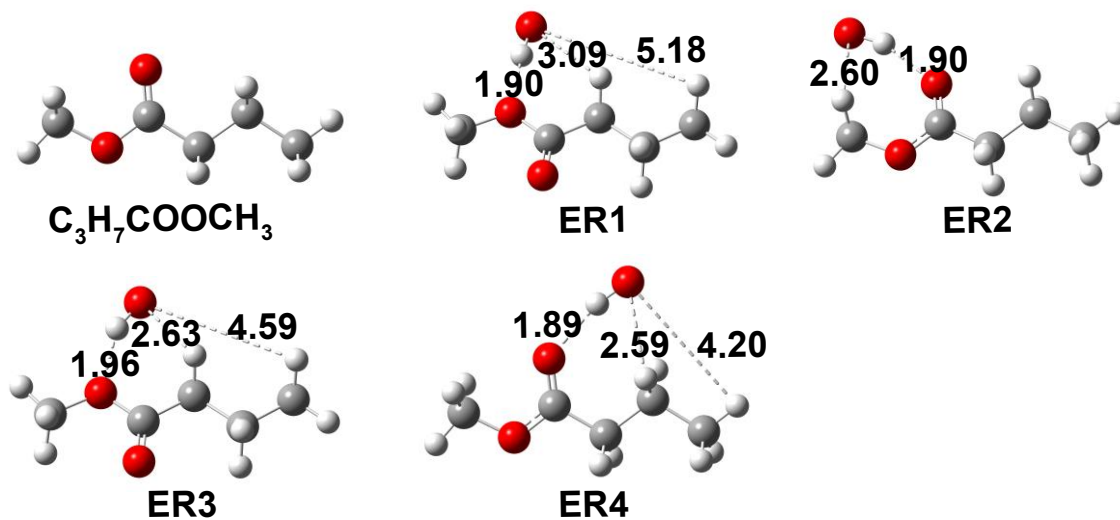

**Figure S2.** Geometries of the stable structures of  $C_3H_7COOCH_3$  and the reactant complexes involved in the reactions of  $C_3H_7COOCH_3$  with  $H\dot{O}$  optimized at the M06-2X/6-311++G (d, p) level.

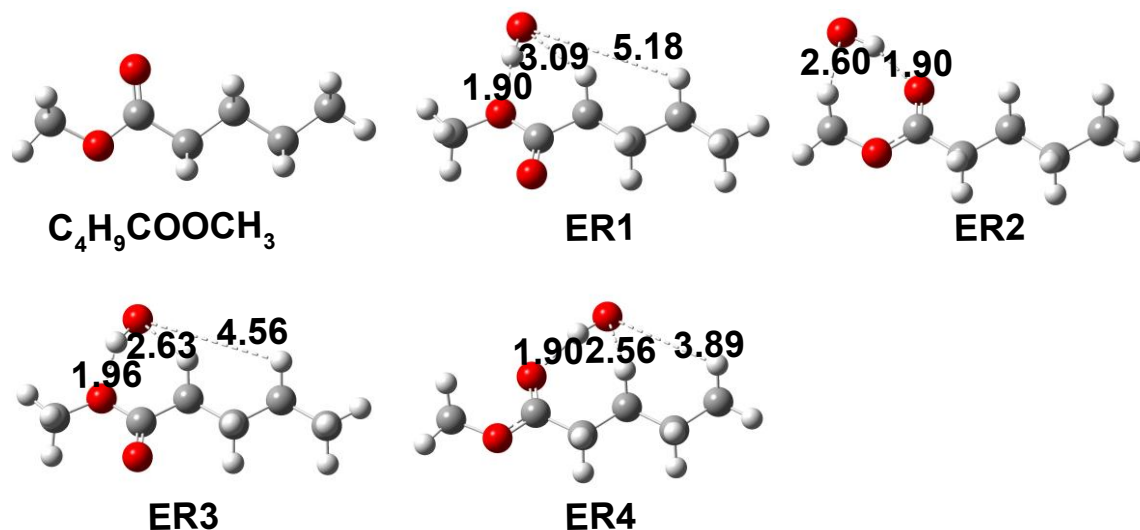

**Figure S3.** Geometries of the stable structures of C<sub>4</sub>H<sub>9</sub>COOCH<sub>3</sub> and the reactant complexes involved in the reactions of C<sub>4</sub>H<sub>9</sub>COOCH<sub>3</sub> with H $\dot{O}$  optimized at the M06-2X/6-311++G (d, p) level.

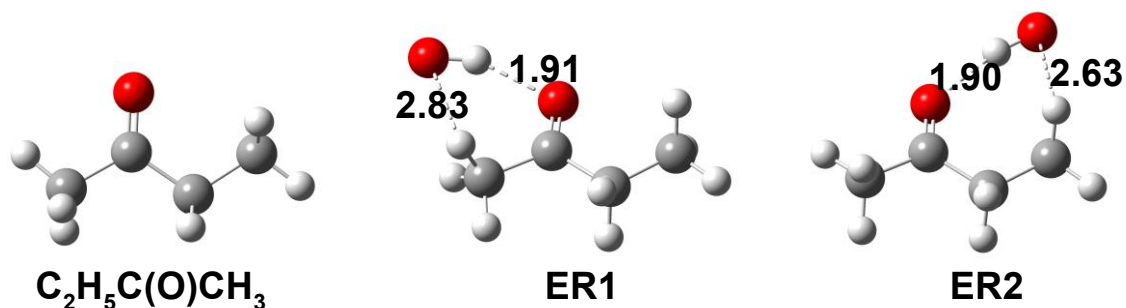

**Figure S4.** Geometries of the stable structures of C<sub>2</sub>H<sub>5</sub>C(O)CH<sub>3</sub> and the reactant complexes involved in the reactions of C<sub>2</sub>H<sub>5</sub>C(O)CH<sub>3</sub> with H $\dot{O}$  optimized at the M06-2X/6-311++G (d, p) level.

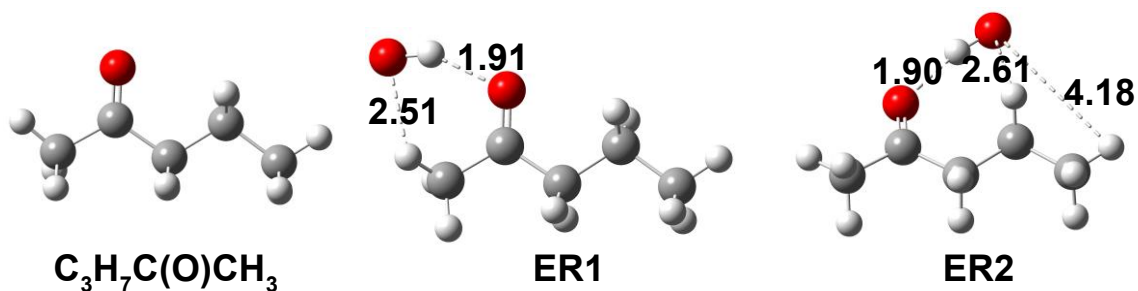

**Figure S5.** Geometries of the stable structures of C<sub>3</sub>H<sub>7</sub>C(O)CH<sub>3</sub> and the reactant complexes involved in the reactions of C<sub>3</sub>H<sub>7</sub>C(O)CH<sub>3</sub> with H $\dot{O}$  optimized at the M06-2X/6-311++G (d, p) level.

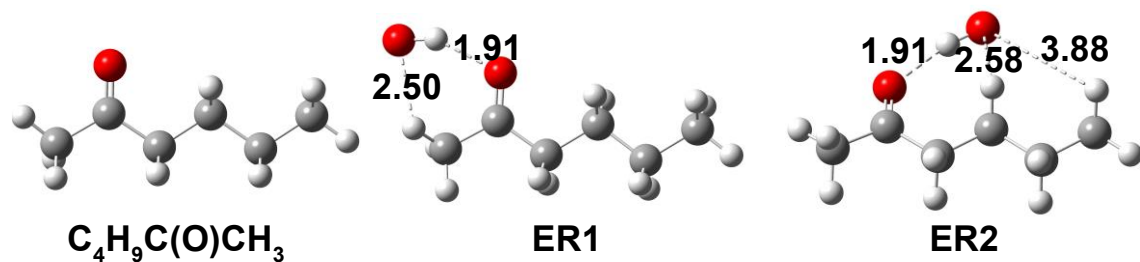

**Figure S6.** Geometries of the stable structures of  $C_4H_9C(O)CH_3$  and the reactant complexes involved in the reactions of  $C_4H_9C(O)CH_3$  with  $H\dot{O}$  optimized at the M06-2X/6-311++G (d, p) level.

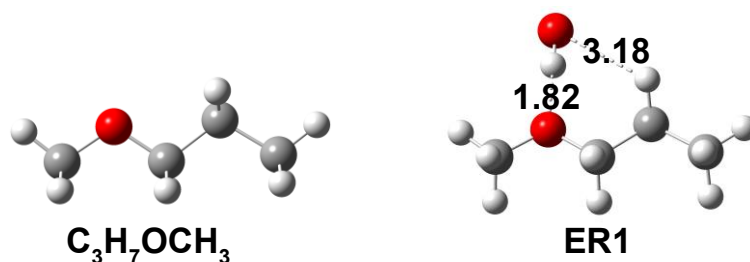

**Figure S7.** Geometries of the stable structures of  $C_3H_7OCH_3$  and the reactant complexes involved in the reactions of  $C_3H_7OCH_3$  with  $H\dot{O}$  optimized at the M06-2X/6-311++G (d, p) level.

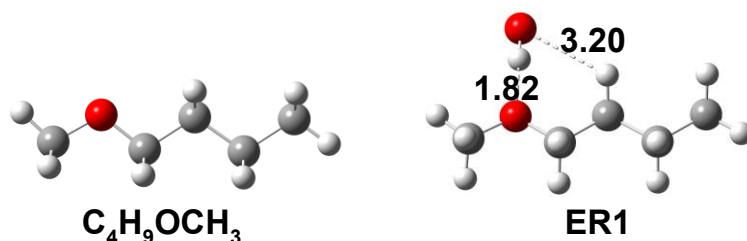

**Figure S8.** Geometries of the stable structures of  $C_4H_9OCH_3$  and the reactant complexes involved in the reactions of  $C_4H_9OCH_3$  with  $H\dot{O}$  optimized at the M06-2X/6-311++G (d, p) level.

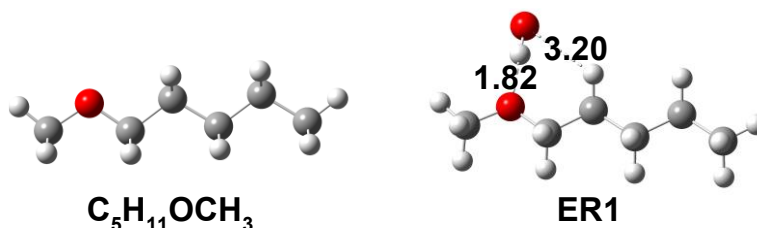

**Figure S9.** Geometries of the stable structures of  $C_5H_{11}OCH_3$  and the reactant complexes involved in the reactions of  $C_5H_{11}OCH_3$  with  $H\dot{O}$  optimized at the M06-2X/6-311++G (d, p) level.

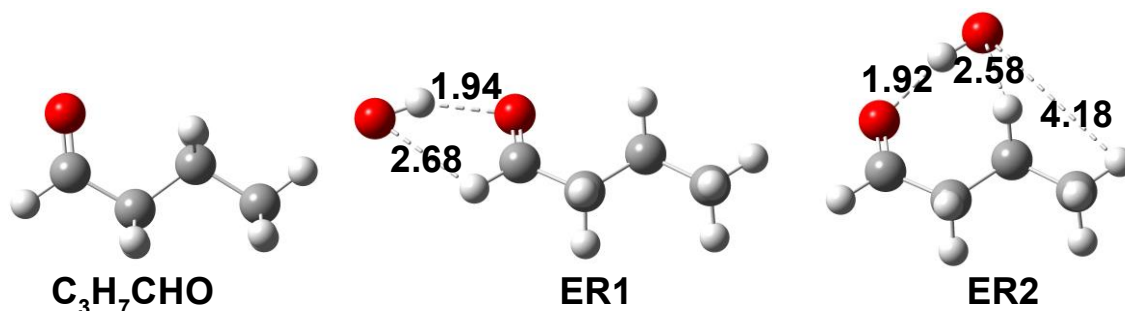

**Figure S10.** Geometries of the stable structures of  $C_3H_7CHO$  and the reactant complexes involved in the reactions of  $C_3H_7CHO$  with  $H\dot{O}$  optimized at the M06-2X/6-311++G (d, p) level.

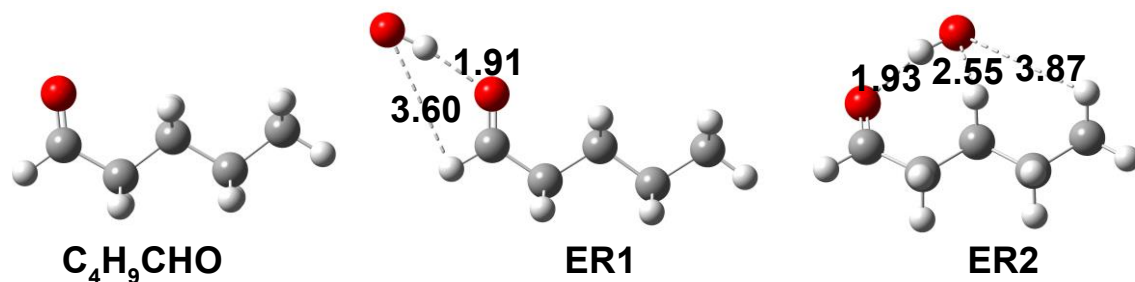

**Figure S11.** Geometries of the stable structures of  $C_4H_9CHO$  and the reactant complexes involved in the reactions of  $C_4H_9CHO$  with  $\dot{H}O$  optimized at the M06-2X/6-311++G (d, p) level.

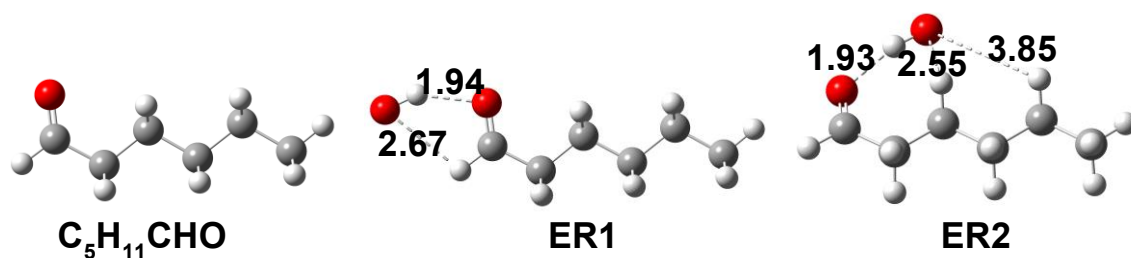

**Figure S12.** Geometries of the stable structures of  $C_5H_{11}CHO$  and the reactant complexes involved in the reactions of  $C_5H_{11}CHO$  with  $\dot{H}O$  optimized at the M06-2X/6-311++G (d, p) level.

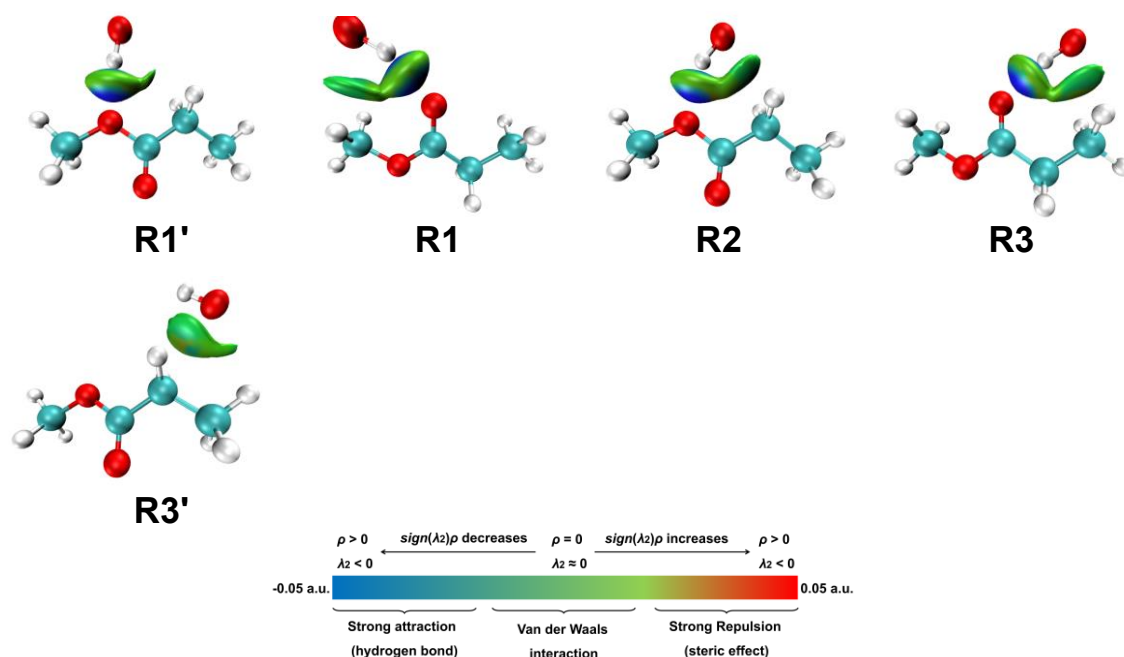

**Figure S13.** Intermolecular interaction of reactant complexes in the reactions of  $CH_3CH_2COOCH_3$  with  $\dot{H}O$ . Blue indicates hydrogen bond; green denotes the vdW interaction; red represents the spatial potential resistance.

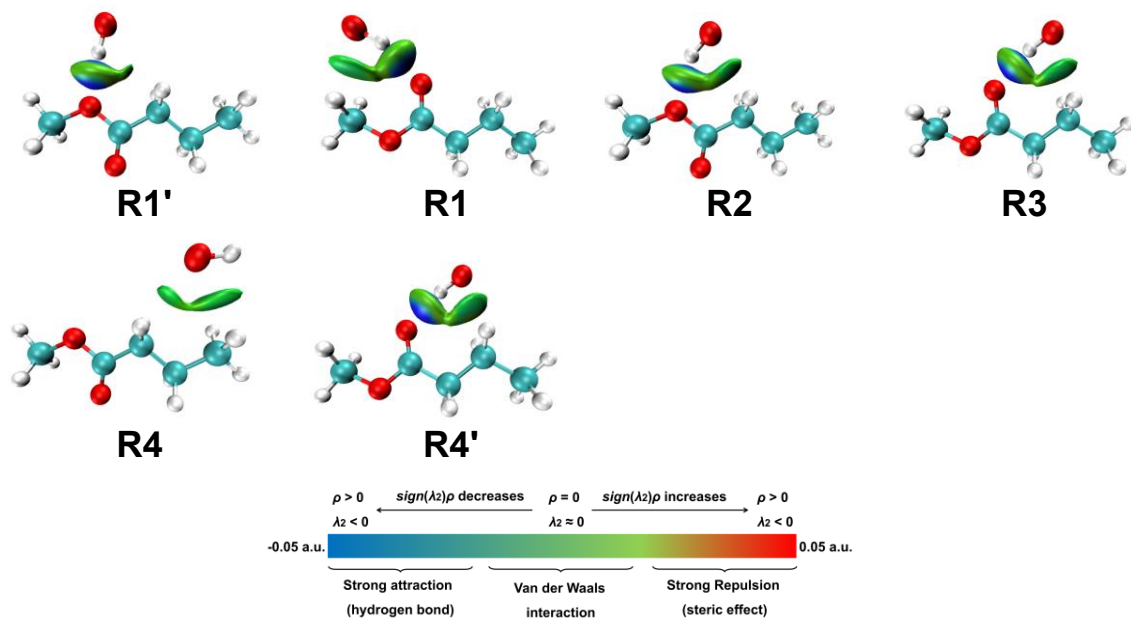

**Figure S14.** Intermolecular interaction of reactant complexes in the reactions of  $\text{CH}_3\text{CH}_2\text{CH}_2\text{COOCH}_3$  with  $\text{HO}\cdot$ . Blue indicates hydrogen bond; green denotes the vdW interaction; red represents the spatial potential resistance.

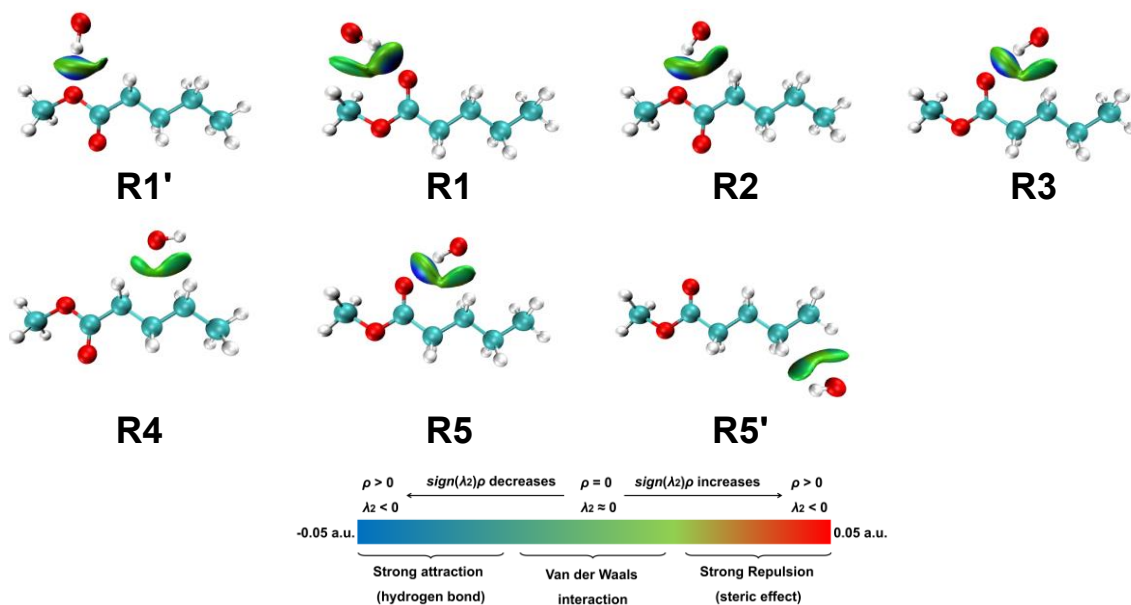

**Figure S15.** Intermolecular interaction of reactant complexes in the reactions of  $\text{CH}_3\text{CH}_2\text{CH}_2\text{CH}_2\text{COOCH}_3$  with  $\text{HO}\cdot$ . Blue indicates hydrogen bond; green denotes the vdW interaction; red represents the spatial potential resistance.

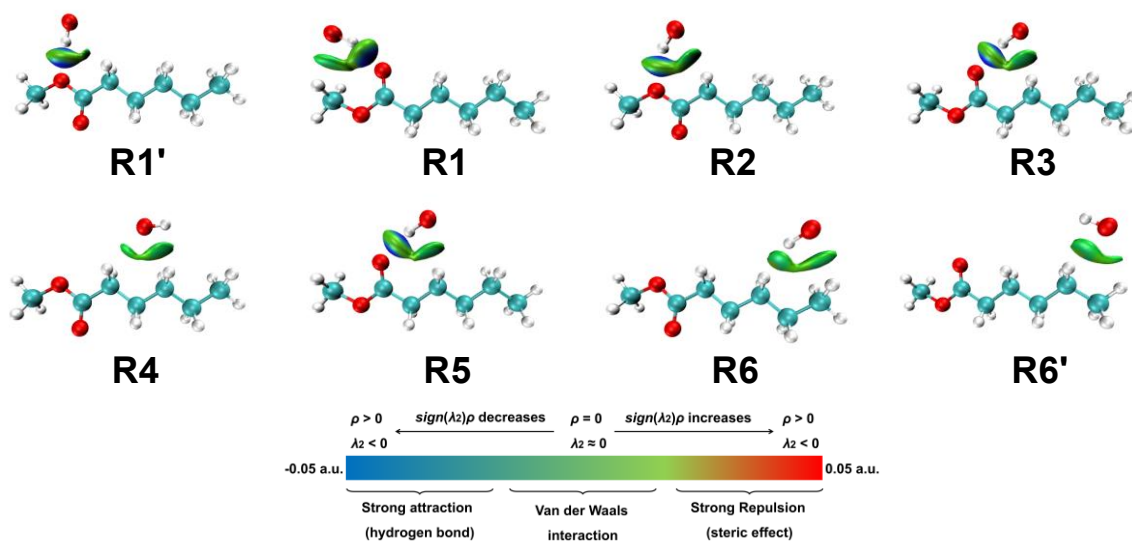

**Figure S16.** Intermolecular interaction of reactant complexes in the reactions of  $\text{CH}_3\text{CH}_2\text{CH}_2\text{CH}_2\text{CH}_2\text{COOCH}_3$  with  $\text{HO}$ . Blue indicates hydrogen bond; green denotes the vdW interaction; red represents the spatial potential resistance.

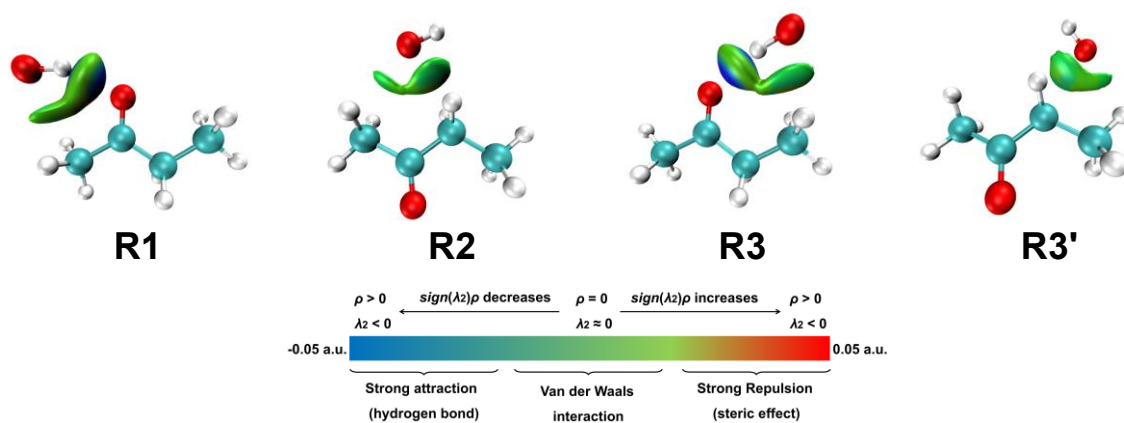

**Figure S17.** Intermolecular interaction of reactant complexes in the reactions of  $\text{CH}_3\text{CH}_2\text{C}(\text{O})\text{CH}_3$  with  $\text{HO}$ . Blue indicates hydrogen bond; green denotes the vdW interaction; red represents the spatial potential resistance.

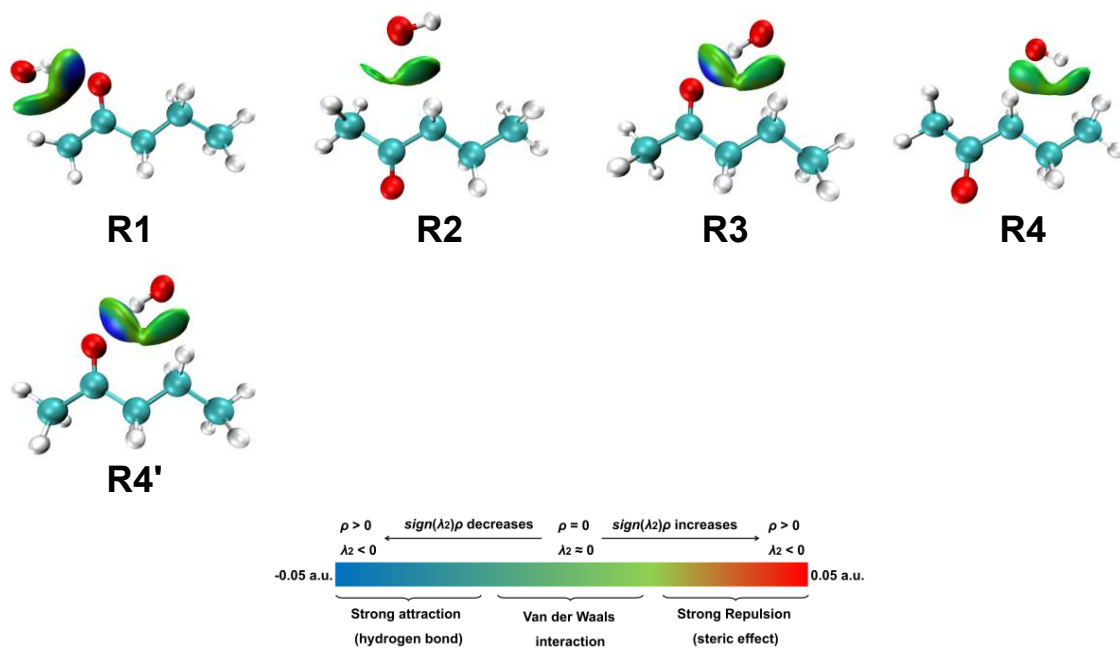

**Figure S18.** Intermolecular interaction of reactant complexes in the reactions of  $\text{CH}_3\text{CH}_2\text{CH}_2\text{C}(\text{O})\text{CH}_3$  with  $\text{HO}$ . Blue indicates hydrogen bond; green denotes the vdW interaction; red represents the spatial potential resistance.

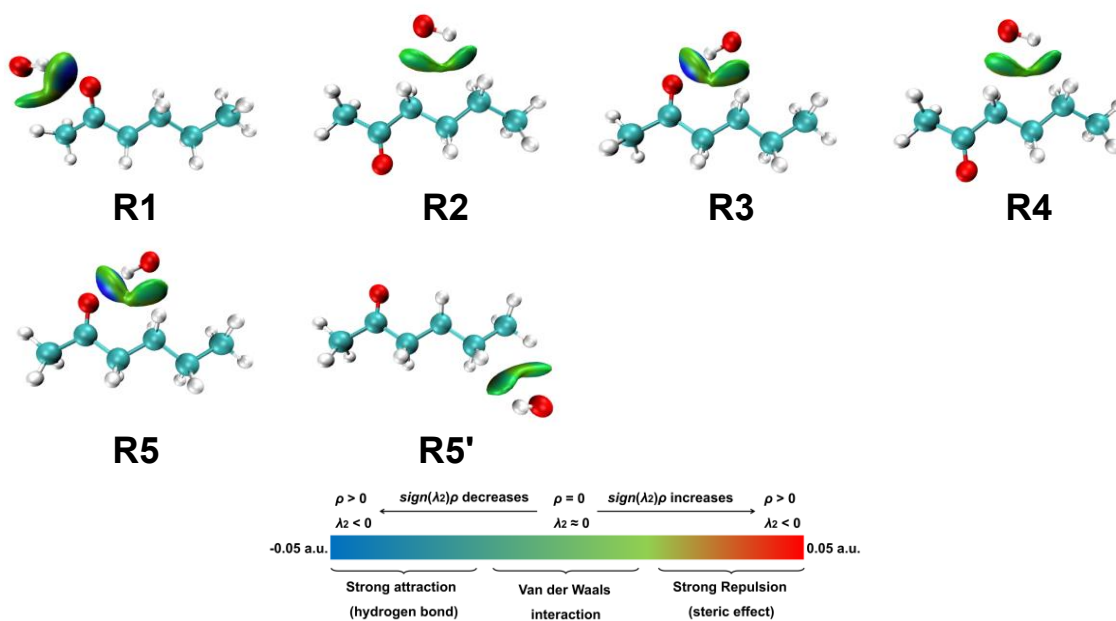

**Figure S19.** Intermolecular interaction of reactant complexes in the reactions of  $\text{CH}_3\text{CH}_2\text{CH}_2\text{CH}_2\text{C}(\text{O})\text{CH}_3$  with  $\text{HO}$ . Blue indicates hydrogen bond; green denotes the vdW interaction; red represents the spatial potential resistance.

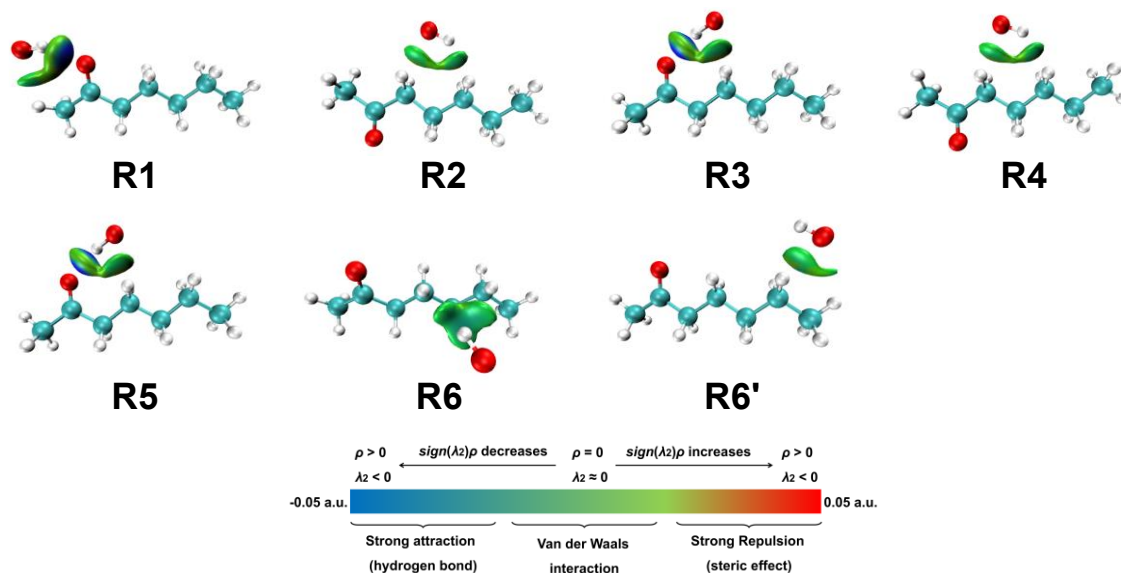

**Figure S20.** Intermolecular interaction of reactant complexes in the reactions of  $\text{CH}_3\text{CH}_2\text{CH}_2\text{CH}_2\text{CH}_2\text{C}(\text{O})\text{CH}_3$  with  $\text{HO}\cdot$ . Blue indicates hydrogen bond; green denotes the vdW interaction; red represents the spatial potential resistance.

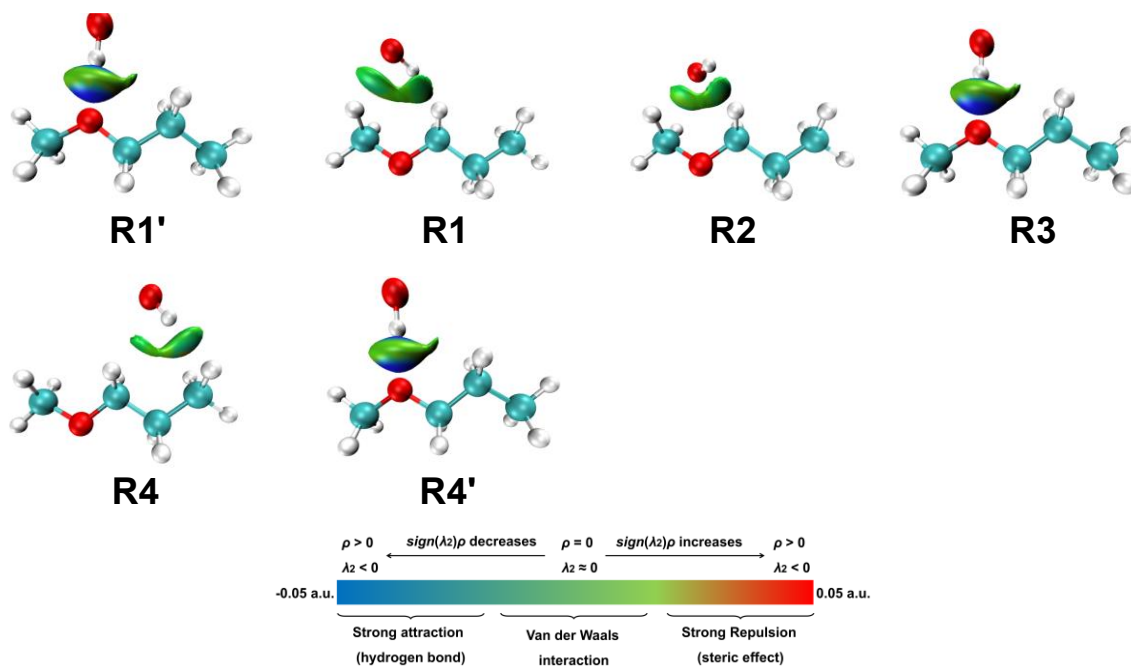

**Figure S21.** Intermolecular interaction of reactant complexes in the reactions of  $\text{CH}_3\text{CH}_2\text{CH}_2\text{OCH}_3$  with  $\text{HO}\cdot$ . Blue indicates hydrogen bond; green denotes the vdW interaction; red represents the spatial potential resistance.

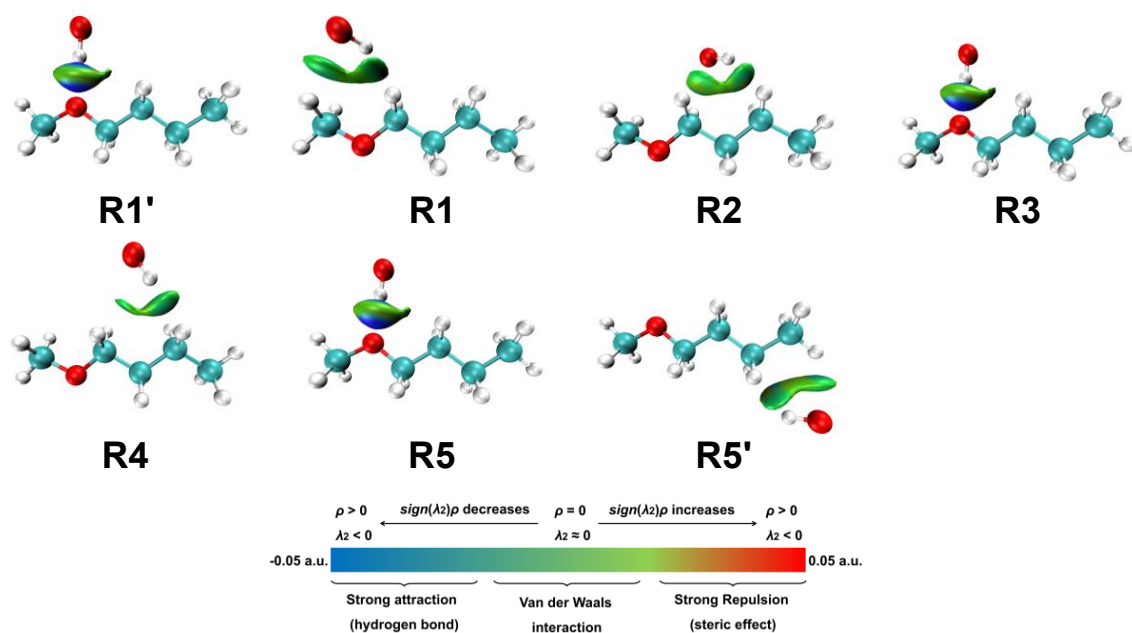

**Figure S22.** Intermolecular interaction of reactant complexes in the reactions of  $\text{CH}_3\text{CH}_2\text{CH}_2\text{CH}_2\text{OCH}_3$  with  $\text{HO}\cdot$ . Blue indicates hydrogen bond; green denotes the vdW interaction; red represents the spatial potential resistance.

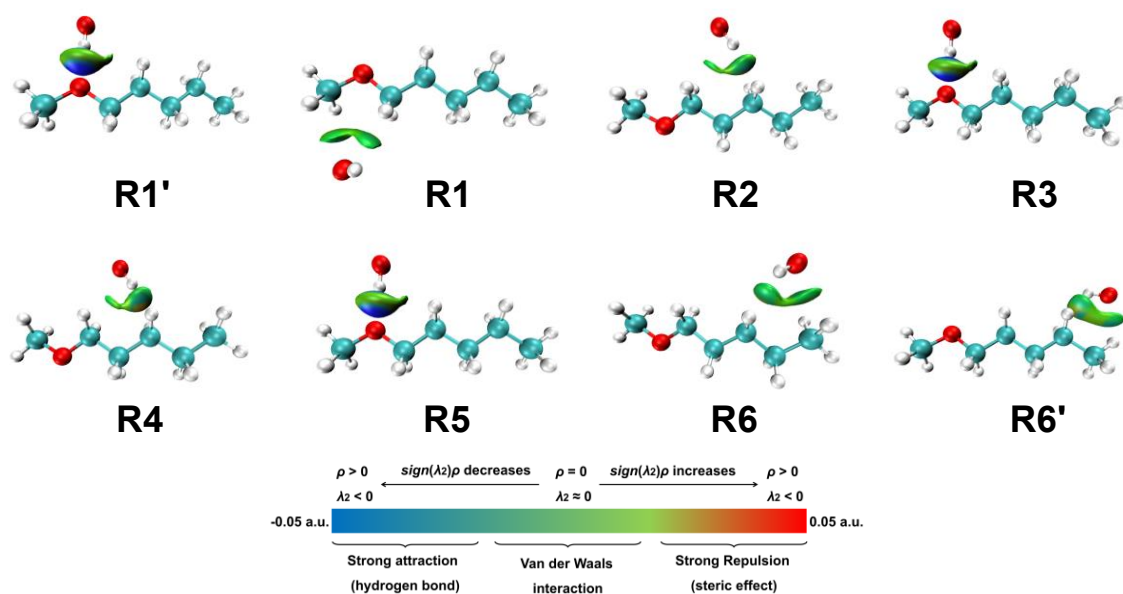

**Figure S23.** Intermolecular interaction of reactant complexes in the reactions of  $\text{CH}_3\text{CH}_2\text{CH}_2\text{CH}_2\text{CH}_2\text{OCH}_3$  with  $\text{HO}\cdot$ . Blue indicates hydrogen bond; green denotes the vdW interaction; red represents the spatial potential resistance.

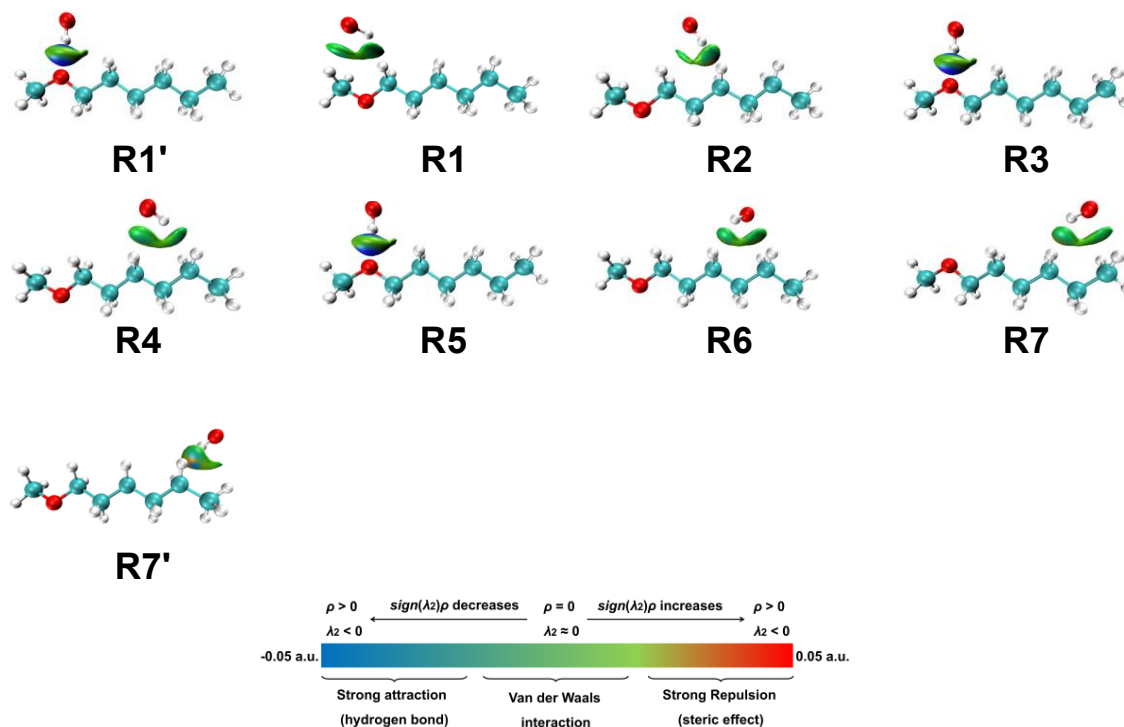

**Figure S24.** Intermolecular interaction of reactant complexes in the reactions of  $\text{CH}_3\text{CH}_2\text{CH}_2\text{CH}_2\text{CH}_2\text{CH}_2\text{OCH}_3$  with  $\text{HO}$ . Blue indicates hydrogen bond; green denotes the vdW interaction; red represents the spatial potential resistance.

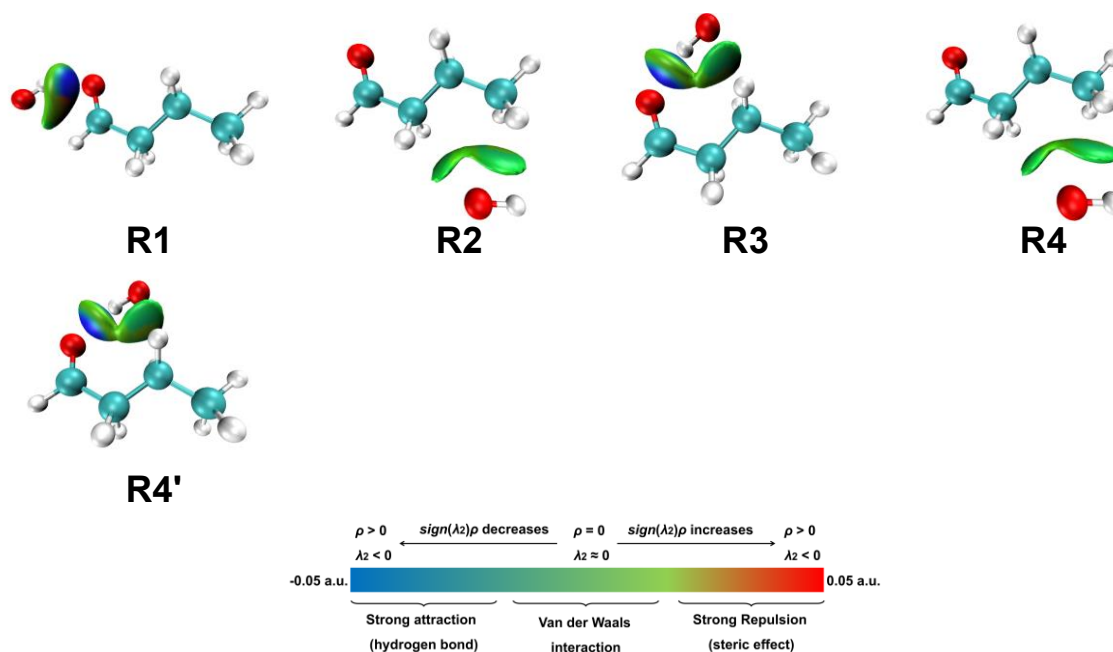

**Figure S25.** Intermolecular interaction of reactant complexes in the reactions of  $\text{CH}_3\text{CH}_2\text{CH}_2\text{CHO}$  with  $\text{HO}$ . Blue indicates hydrogen bond; green denotes the vdW interaction; red represents the spatial potential resistance.

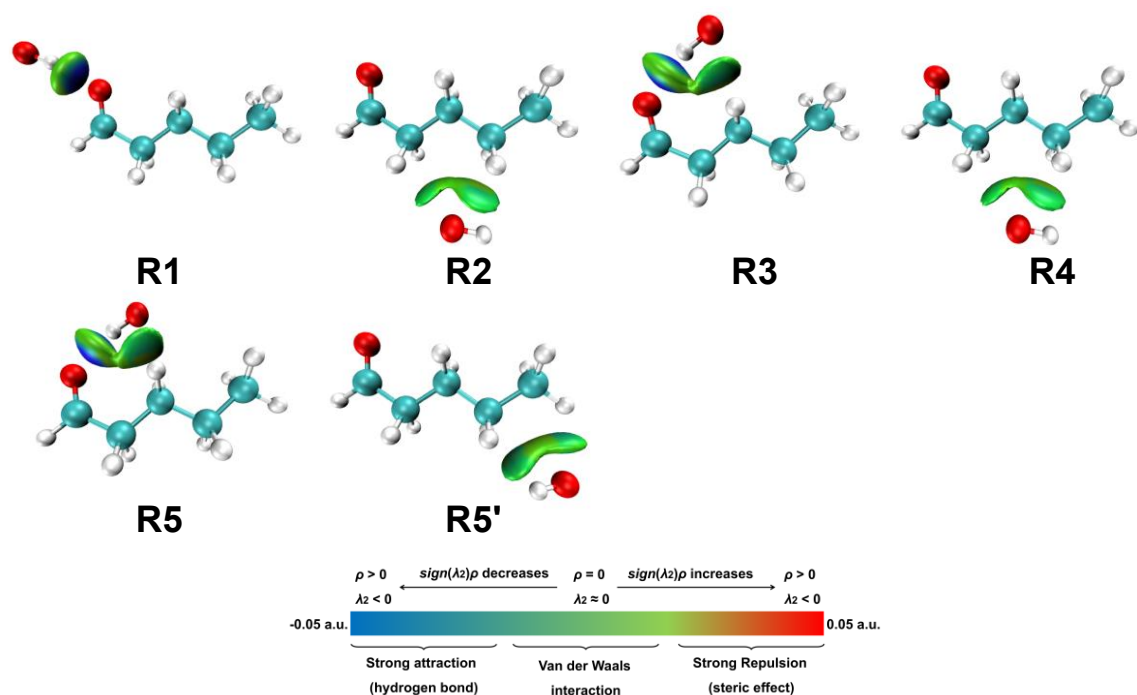

**Figure S26.** Intermolecular interaction of reactant complexes in the reactions of  $\text{CH}_3\text{CH}_2\text{CH}_2\text{CH}_2\text{CHO}$  with  $\text{HO}$ . Blue indicates hydrogen bond; green denotes the vdW interaction; red represents the spatial potential resistance.

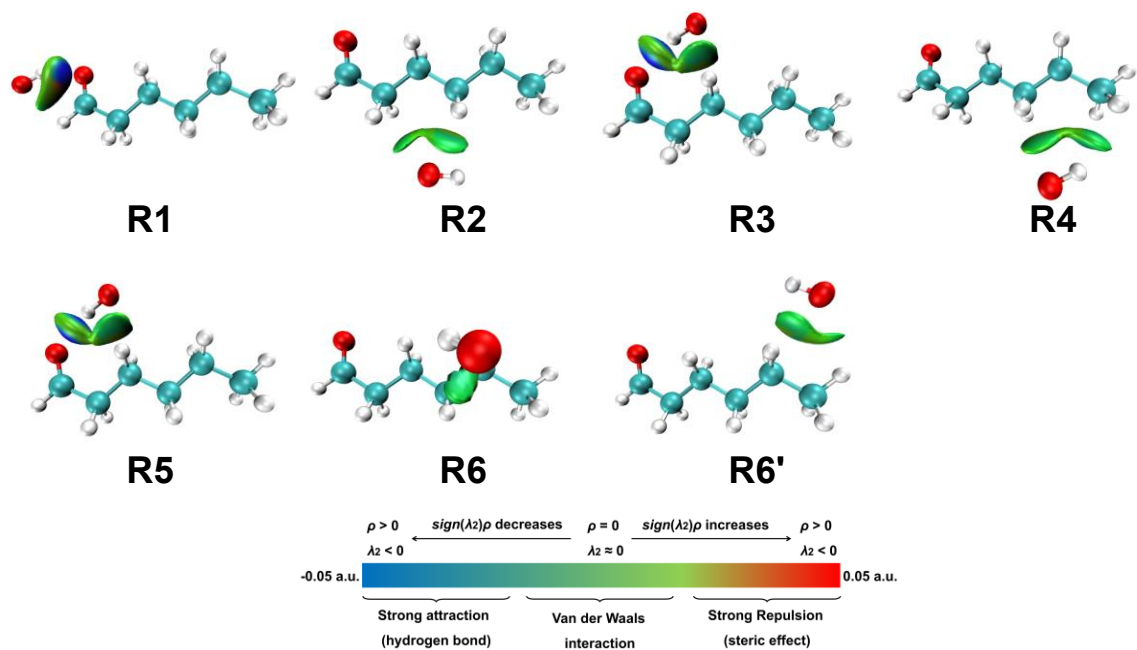

**Figure S27.** Intermolecular interaction of reactant complexes in the reactions of  $\text{CH}_3\text{CH}_2\text{CH}_2\text{CH}_2\text{CH}_2\text{CHO}$  with  $\text{HO}$ . Blue indicates hydrogen bond; green denotes the vdW interaction; red represents the spatial potential resistance.

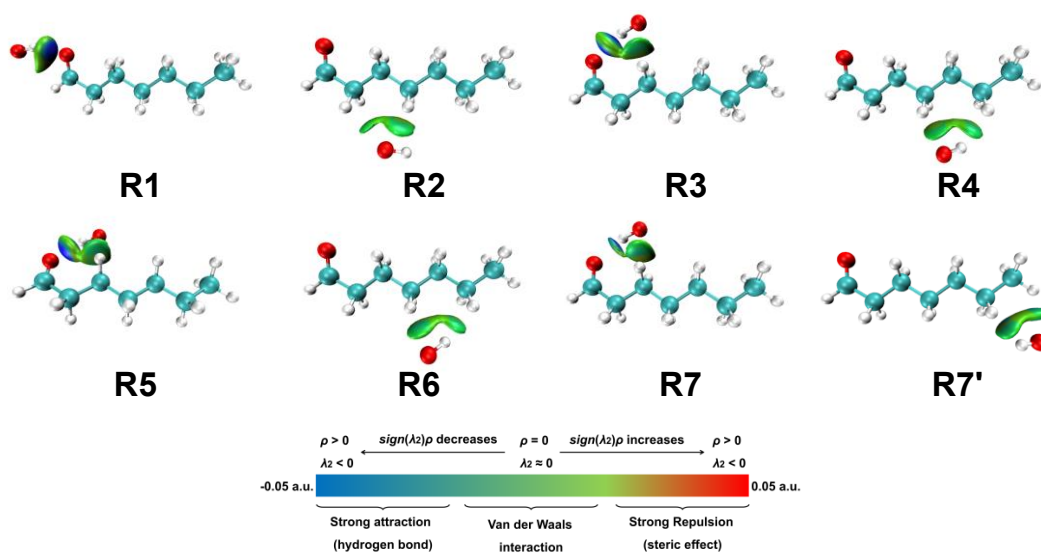

**Figure S28.** Intermolecular interaction of reactant complexes in the reactions of  $\text{CH}_3\text{CH}_2\text{CH}_2\text{CH}_2\text{CH}_2\text{CHO}$  with  $\text{H}\ddot{\text{O}}$ . Blue indicates hydrogen bond; green denotes the vdW interaction; red represents the spatial potential resistance.

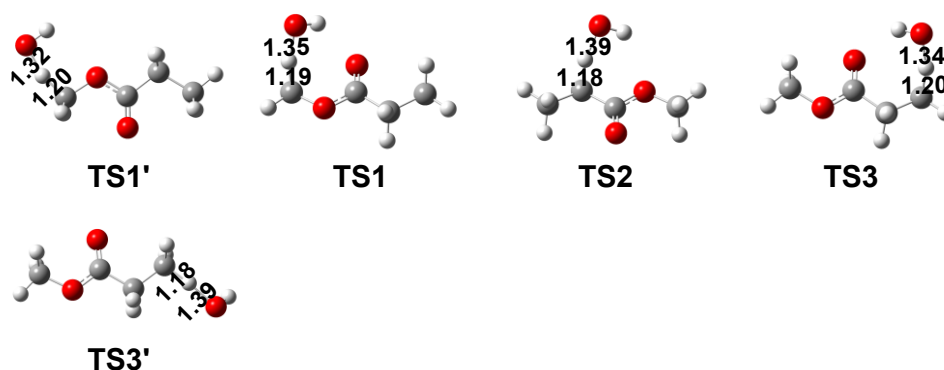

**Figure S29.** Geometries of the transition states involved in the reactions of  $\text{CH}_3\text{CH}_2\text{COOCH}_3$  with  $\text{H}\ddot{\text{O}}$  optimized at the M06-2X/6-311++G (d, p) level.

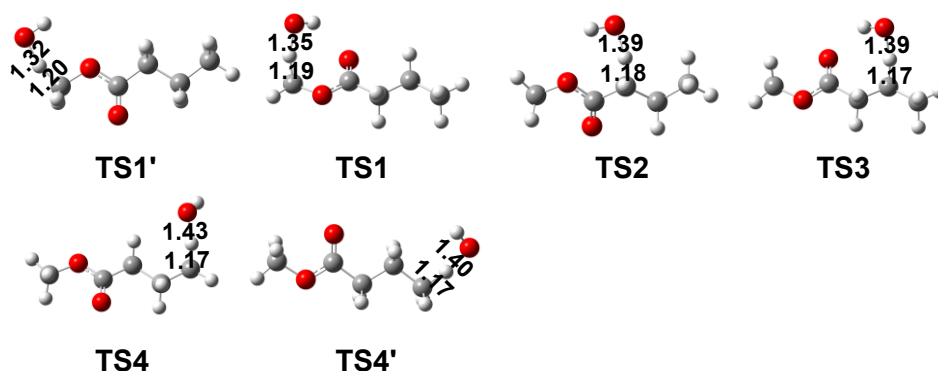

**Figure S30.** Geometries of the transition states involved in the reactions of  $\text{CH}_3\text{CH}_2\text{CH}_2\text{COOCH}_3$  with  $\text{H}\ddot{\text{O}}$  optimized at the M06-2X/6-311++G (d, p) level.

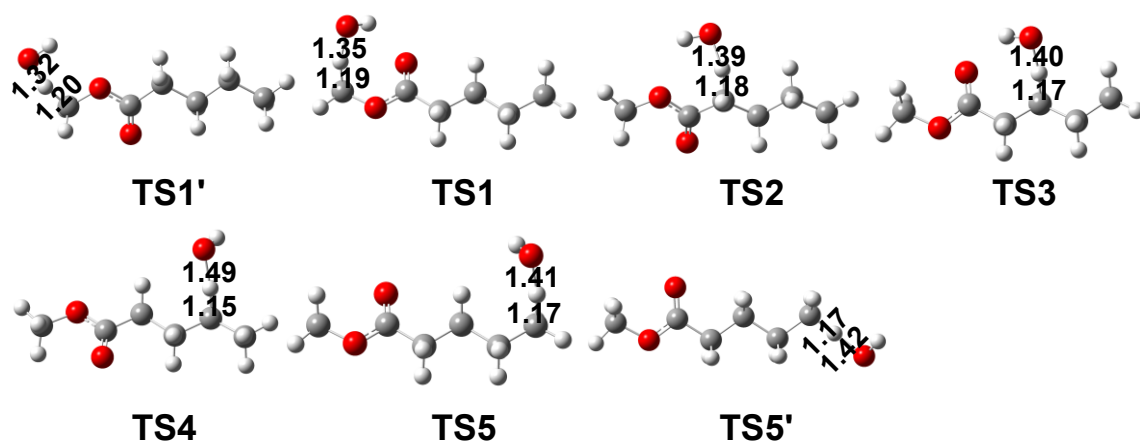

**Figure S31.** Geometries of the transition states involved in the reactions of  $\text{CH}_3\text{CH}_2\text{CH}_2\text{CH}_2\text{COOCH}_3$  with  $\text{HO}\cdot$  optimized at the M06-2X/6-311++G (d, p) level.

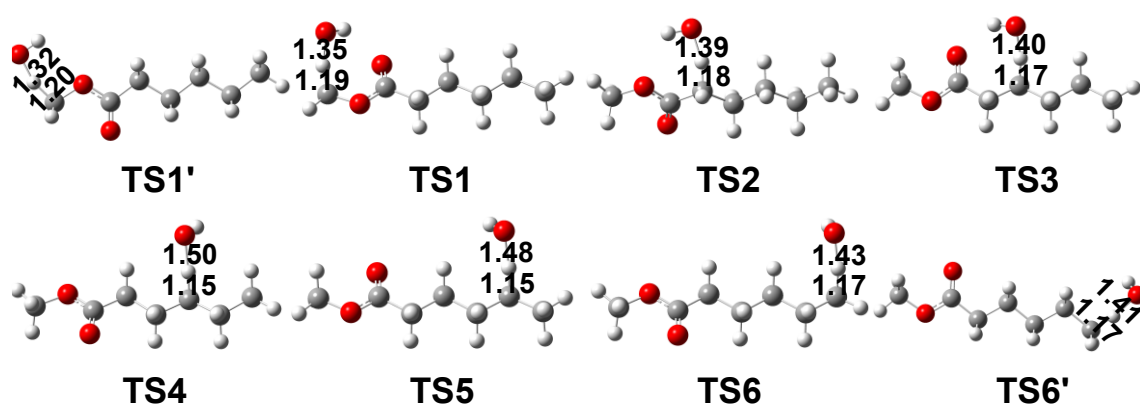

**Figure S32.** Geometries of the transition states involved in the reactions of  $\text{CH}_3\text{CH}_2\text{CH}_2\text{CH}_2\text{CH}_2\text{COOCH}_3$  with  $\text{HO}\cdot$  optimized at the M06-2X/6-311++G (d, p) level.

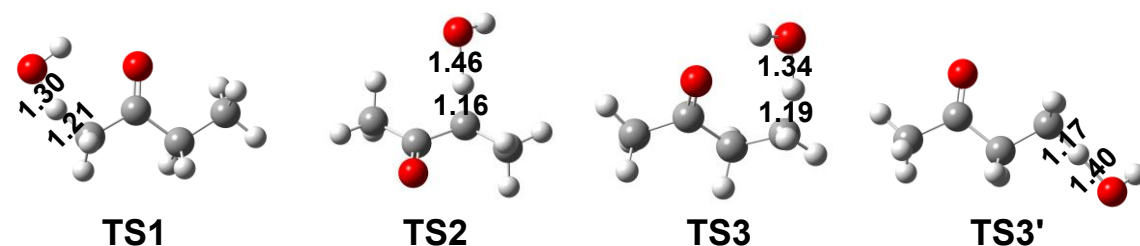

**Figure S33.** Geometries of the transition states involved in the reactions of  $\text{CH}_3\text{CH}_2\text{C(O)CH}_3$  with  $\text{HO}\cdot$  optimized at the M06-2X/6-311++G (d, p) level.

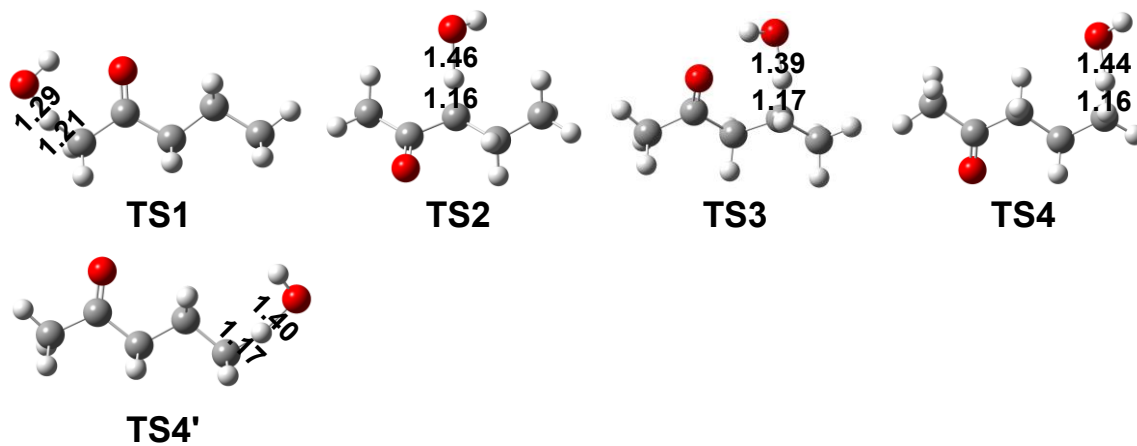

**Figure S34.** Geometries of the transition states involved in the reactions of  $\text{CH}_3\text{CH}_2\text{CH}_2\text{C}(\text{O})\text{CH}_3$  with  $\text{HO}^\bullet$  optimized at the M06-2X/6-311++G (d, p) level.

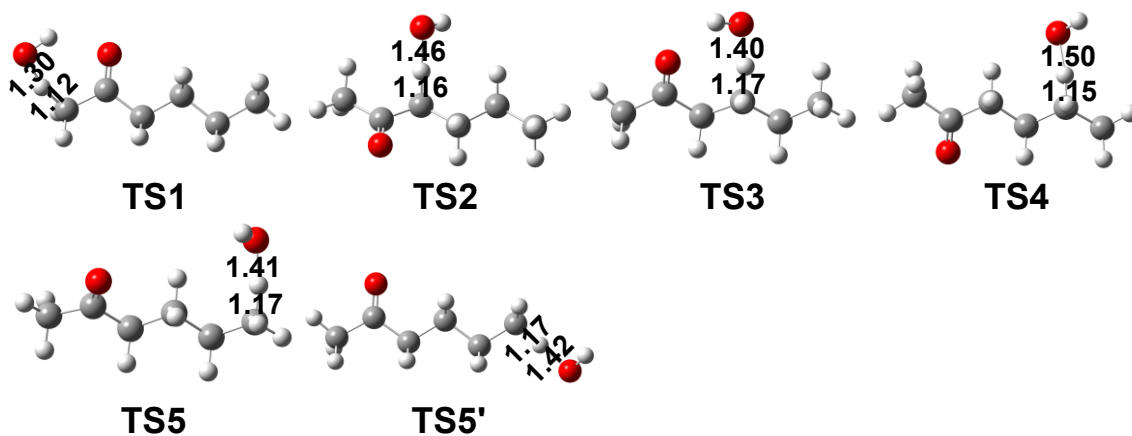

**Figure S35.** Geometries of the transition states involved in the reactions of  $\text{CH}_3\text{CH}_2\text{CH}_2\text{CH}_2\text{C}(\text{O})\text{CH}_3$  with  $\text{HO}^\bullet$  optimized at the M06-2X/6-311++G (d, p) level.

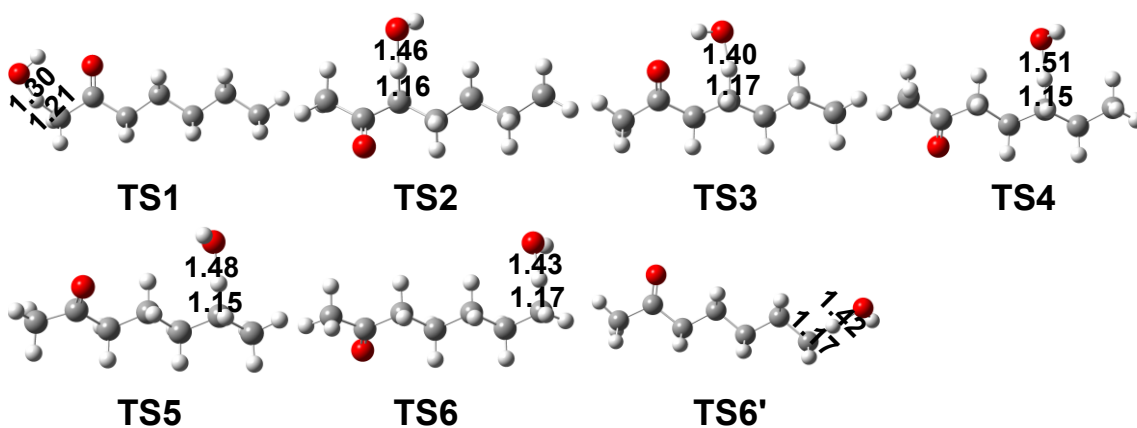

**Figure S36.** Geometries of the transition states involved in the reactions of  $\text{CH}_3\text{CH}_2\text{CH}_2\text{CH}_2\text{CH}_2\text{C}(\text{O})\text{CH}_3$  with  $\text{HO}^\bullet$  optimized at the M06-2X/6-311++G (d, p) level.

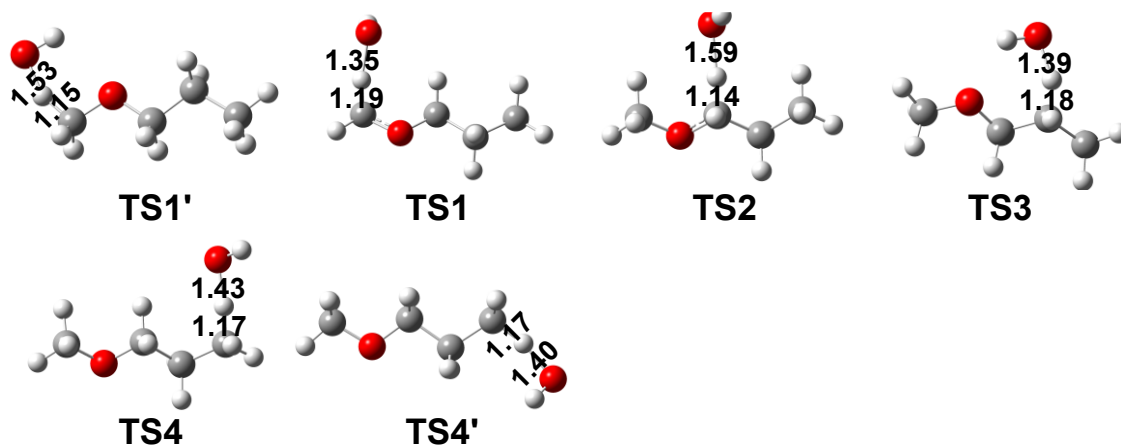

**Figure S37.** Geometries of the transition states involved in the reactions of  $\text{CH}_3\text{OCH}_2\text{CH}_2\text{CH}_3$  with  $\text{HO}$  optimized at the M06-2X/6-311++G (d, p) level.

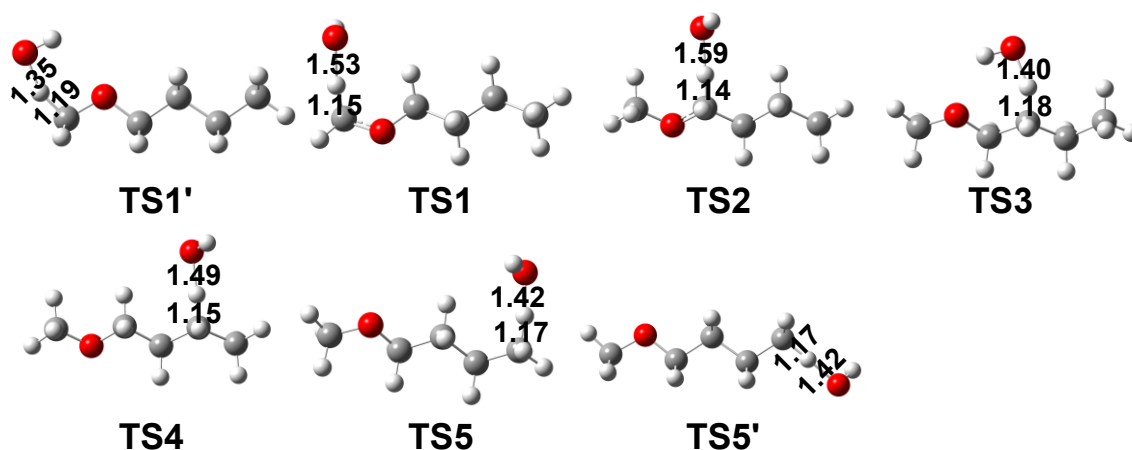

**Figure S38.** Geometries of the transition states involved in the reactions of  $\text{CH}_3\text{OCH}_2\text{CH}_2\text{CH}_2\text{CH}_3$  with  $\text{HO}$  optimized at the M06-2X/6-311++G (d, p) level.

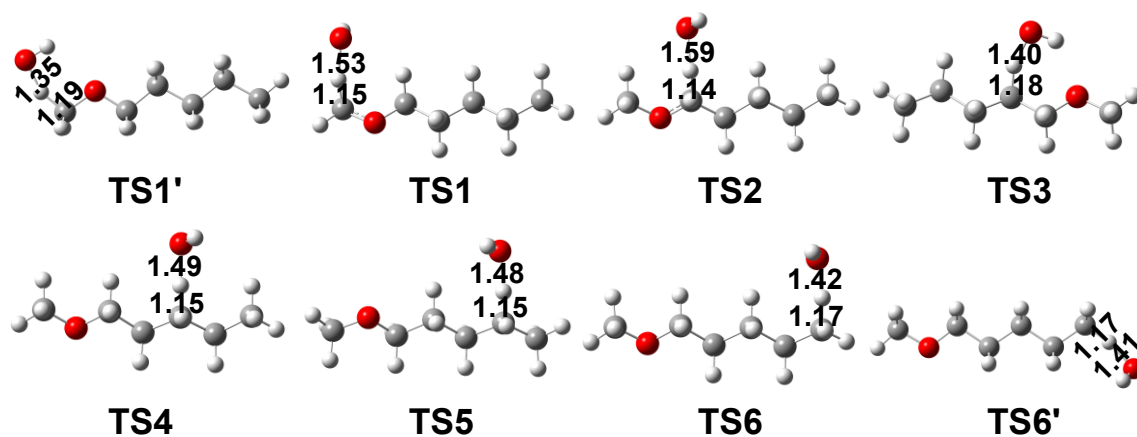

**Figure S39.** Geometries of the transition states involved in the reactions of  $\text{CH}_3\text{OCH}_2\text{CH}_2\text{CH}_2\text{CH}_2\text{CH}_3$  with  $\text{HO}$  optimized at the M06-2X/6-311++G (d, p) level.

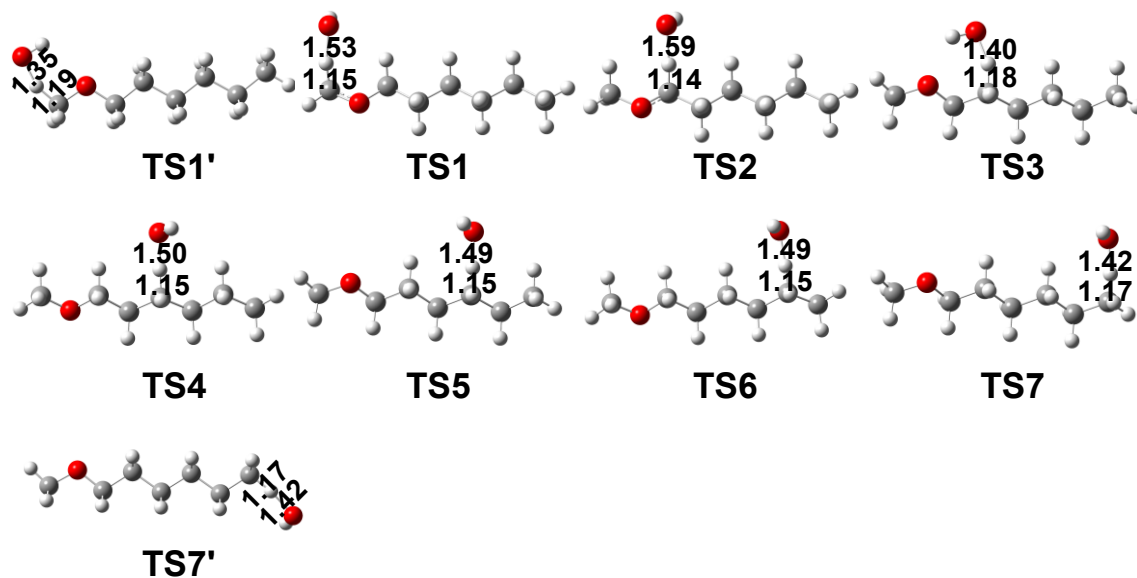

**Figure S40.** Geometries of the transition states involved in the reactions of  $\text{CH}_3\text{OCH}_2\text{CH}_2\text{CH}_2\text{CH}_2\text{CH}_2\text{CH}_3$  with  $\text{HO}$  optimized at the M06-2X/6-311++G (d, p) level.

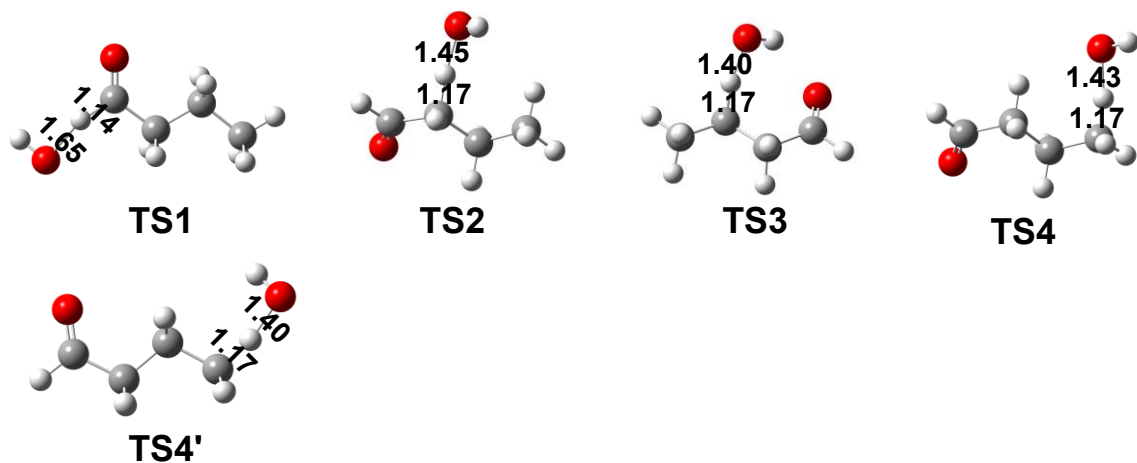

**Figure S41.** Geometries of the transition states involved in the reactions of  $\text{CH}_3\text{CH}_2\text{CH}_2\text{CHO}$  with  $\text{HO}$  optimized at the M06-2X/6-311++G (d, p) level.

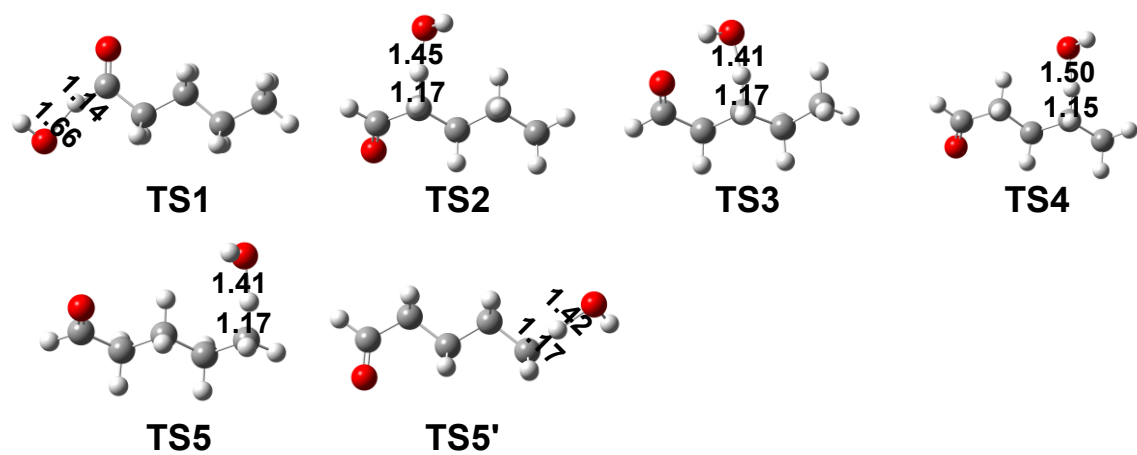

**Figure S42.** Geometries of the transition states involved in the reactions of  $\text{CH}_3\text{CH}_2\text{CH}_2\text{CH}_2\text{CHO}$  with  $\text{HO}$  optimized at the M06-2X/6-311++G (d, p) level.

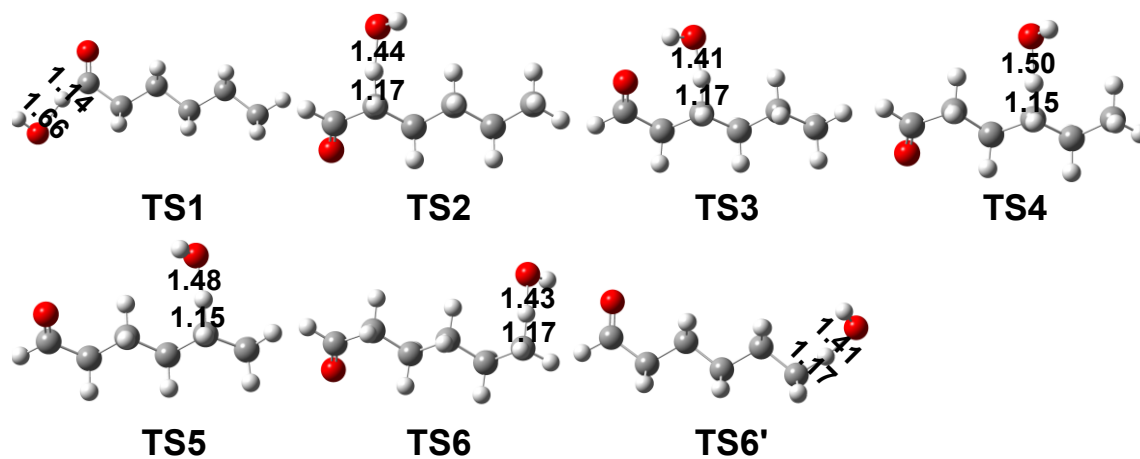

**Figure S43.** Geometries of the transition states involved in the reactions of  $\text{CH}_3\text{CH}_2\text{CH}_2\text{CH}_2\text{CH}_2\text{CHO}$  with  $\text{HO}$  optimized at the M06-2X/6-311++G (d, p) level.

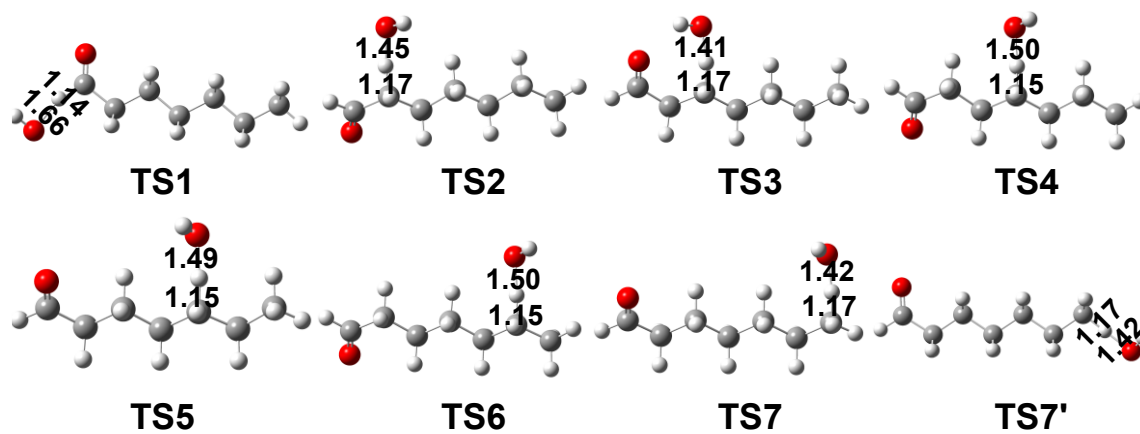

**Figure S44.** Geometries of the transition states involved in the reactions of  $\text{CH}_3\text{CH}_2\text{CH}_2\text{CH}_2\text{CH}_2\text{CH}_2\text{CHO}$  with  $\text{HO}$  optimized at the M06-2X/6-311++G (d, p) level.

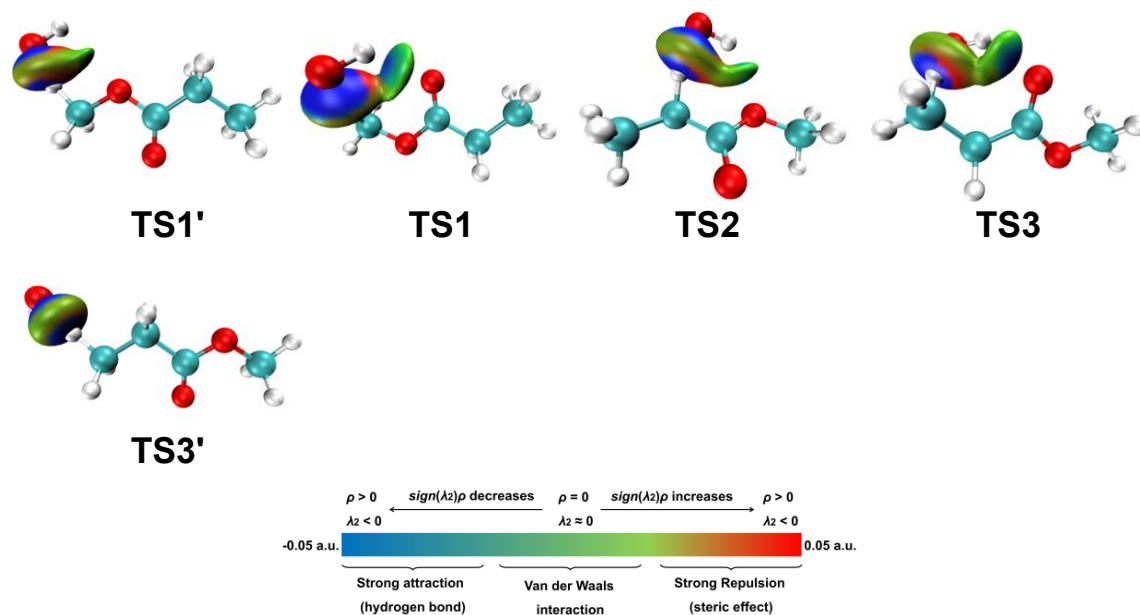

**Figure S45.** Intermolecular interaction of transition states in the reactions of  $\text{CH}_3\text{CH}_2\text{COOCH}_3$  with  $\text{HO}\cdot$ . Blue indicates hydrogen bond; green denotes the vdW interaction; red represents the spatial potential resistance.

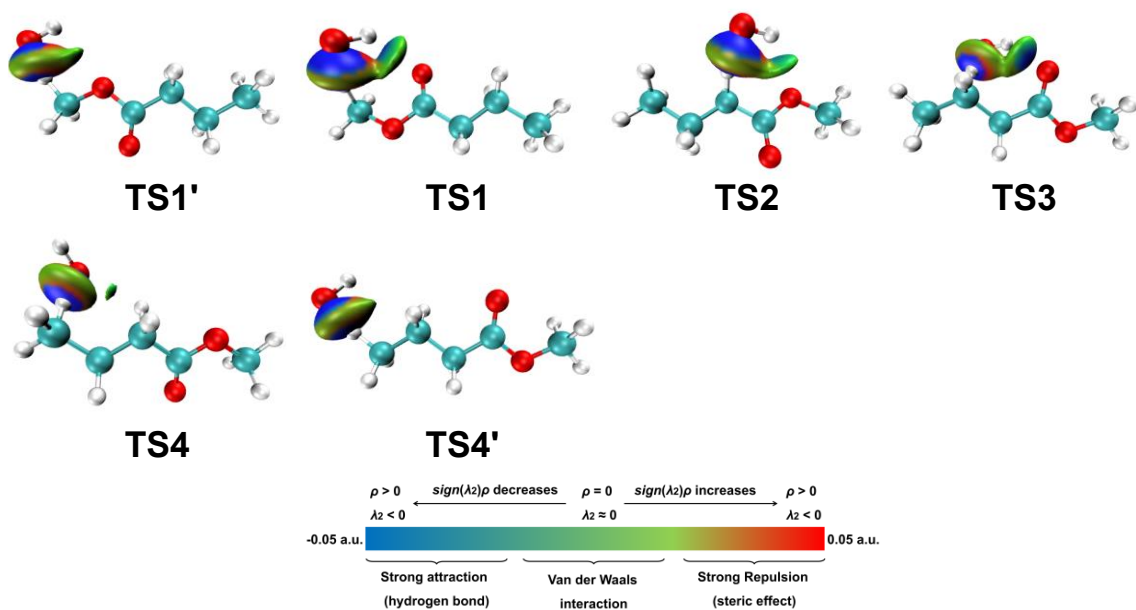

**Figure S46.** Intermolecular interaction of transition states in the reactions of  $\text{CH}_3\text{CH}_2\text{CH}_2\text{COOCH}_3$  with  $\text{HO}\cdot$ . Blue indicates hydrogen bond; green denotes the vdW interaction; red represents the spatial potential resistance.

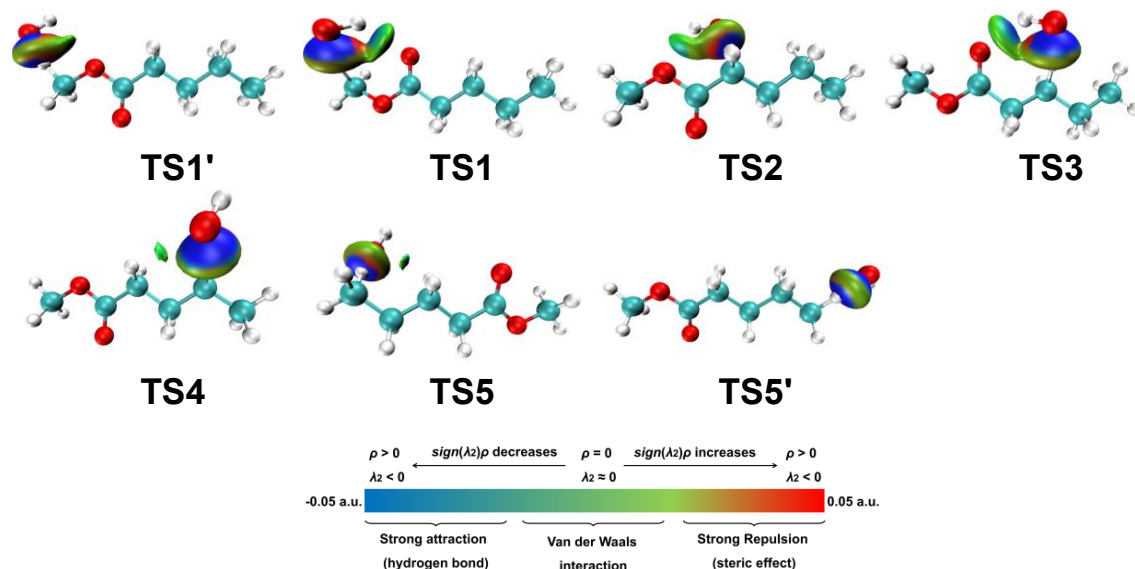

**Figure S47.** Intermolecular interaction of transition states in the reactions of  $\text{CH}_3\text{CH}_2\text{CH}_2\text{CH}_2\text{COOCH}_3$  with  $\text{HO}$ . Blue indicates hydrogen bond; green denotes the vdW interaction; red represents the spatial potential resistance.

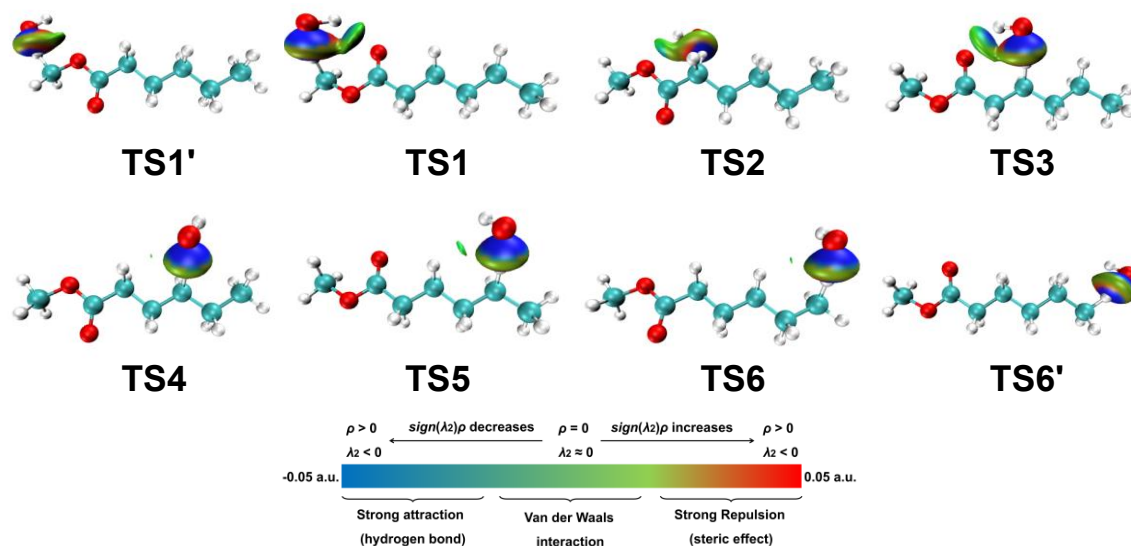

**Figure S48.** Intermolecular interaction of transition states in the reactions of  $\text{CH}_3\text{CH}_2\text{CH}_2\text{CH}_2\text{CH}_2\text{COOCH}_3$  with  $\text{HO}$ . Blue indicates hydrogen bond; green denotes the vdW interaction; red represents the spatial potential resistance.

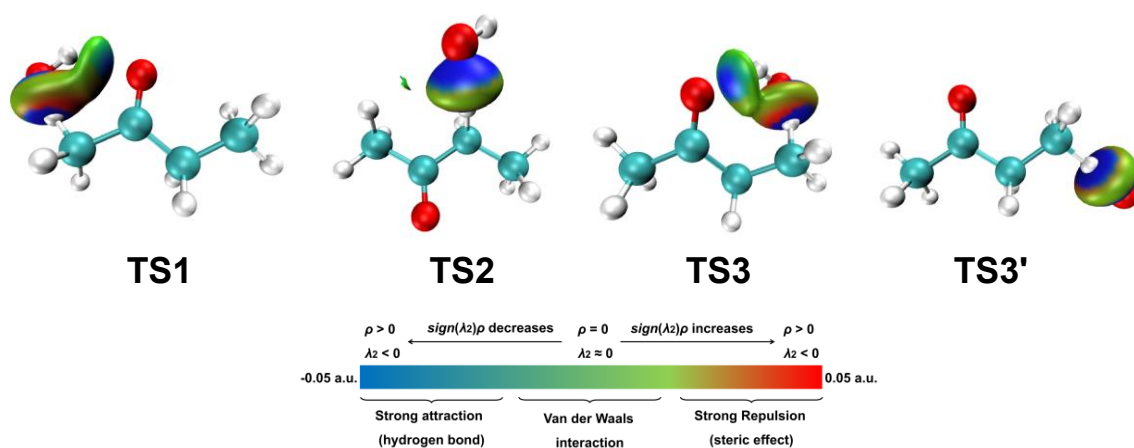

**Figure S49.** Intermolecular interaction of transition states in the reactions of  $\text{CH}_3\text{CH}_2\text{C}(\text{O})\text{CH}_3$  with  $\text{HO}\cdot$ . Blue indicates hydrogen bond; green denotes the vdW interaction; red represents the spatial potential resistance.

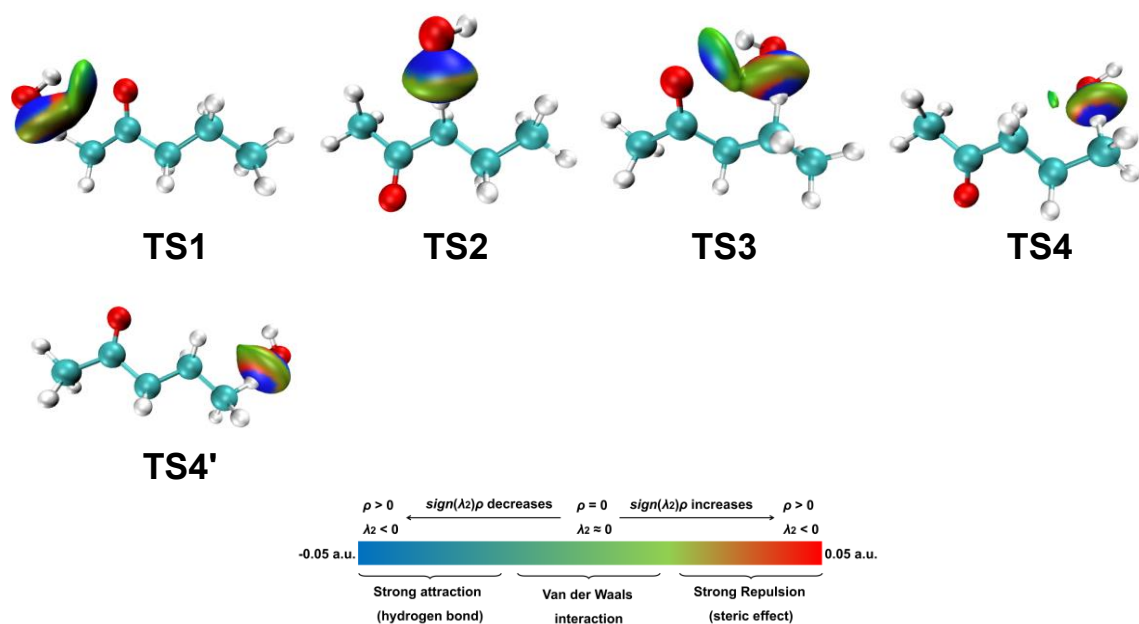

**Figure S50.** Intermolecular interaction of transition states in the reactions of  $\text{CH}_3\text{CH}_2\text{CH}_2\text{C}(\text{O})\text{CH}_3$  with  $\text{HO}\cdot$ . Blue indicates hydrogen bond; green denotes the vdW interaction; red represents the spatial potential resistance.

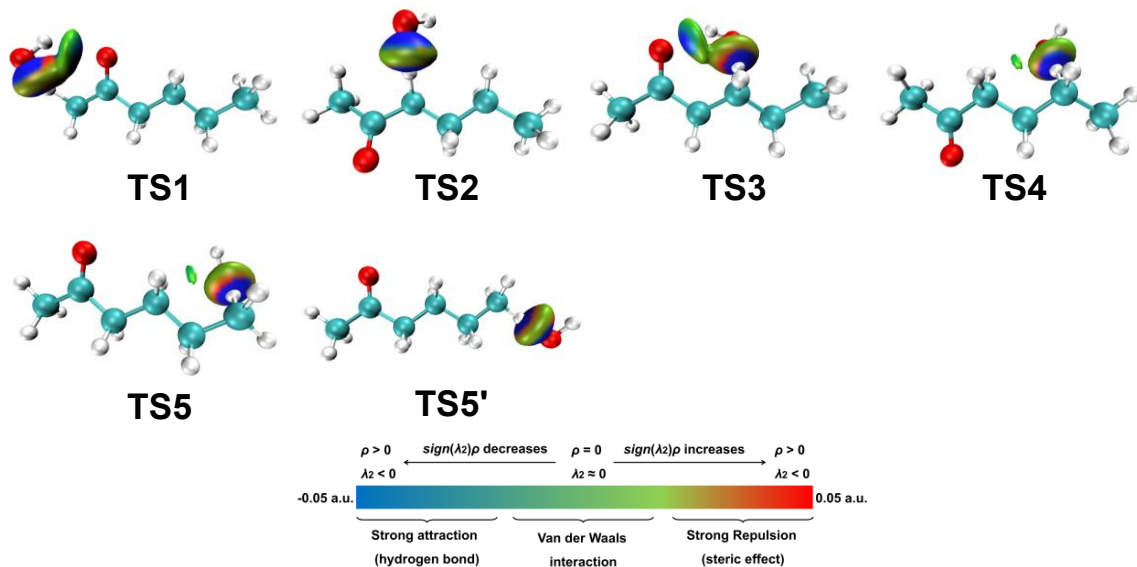

**Figure S51.** Intermolecular interaction of transition states in the reactions of  $\text{CH}_3\text{CH}_2\text{CH}_2\text{CH}_2\text{C}(\text{O})\text{CH}_3$  with  $\text{HO}$ . Blue indicates hydrogen bond; green denotes the vdW interaction; red represents the spatial potential resistance.

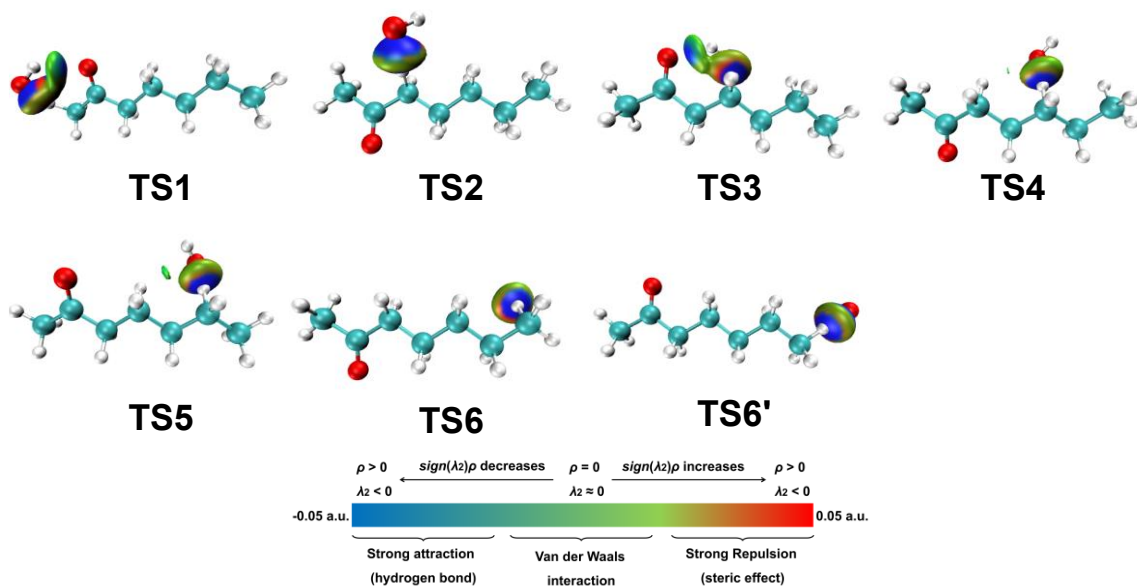

**Figure S52.** Intermolecular interaction of transition states in the reactions of  $\text{CH}_3\text{CH}_2\text{CH}_2\text{CH}_2\text{CH}_2\text{C}(\text{O})\text{CH}_3$  with  $\text{HO}$ . Blue indicates hydrogen bond; green denotes the vdW interaction; red represents the spatial potential resistance.

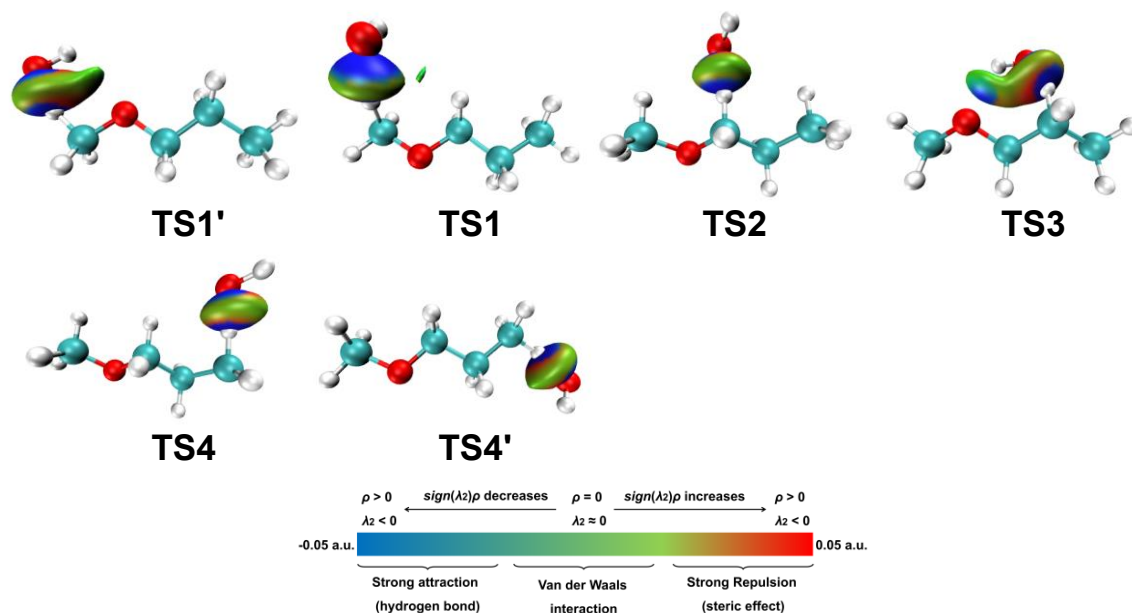

**Figure S53.** Intermolecular interaction of transition states in the reactions of  $\text{CH}_3\text{OCH}_2\text{CH}_2\text{CH}_3$  with  $\text{HO}$ . Blue indicates hydrogen bond; green denotes the vdW interaction; red represents the spatial potential resistance.

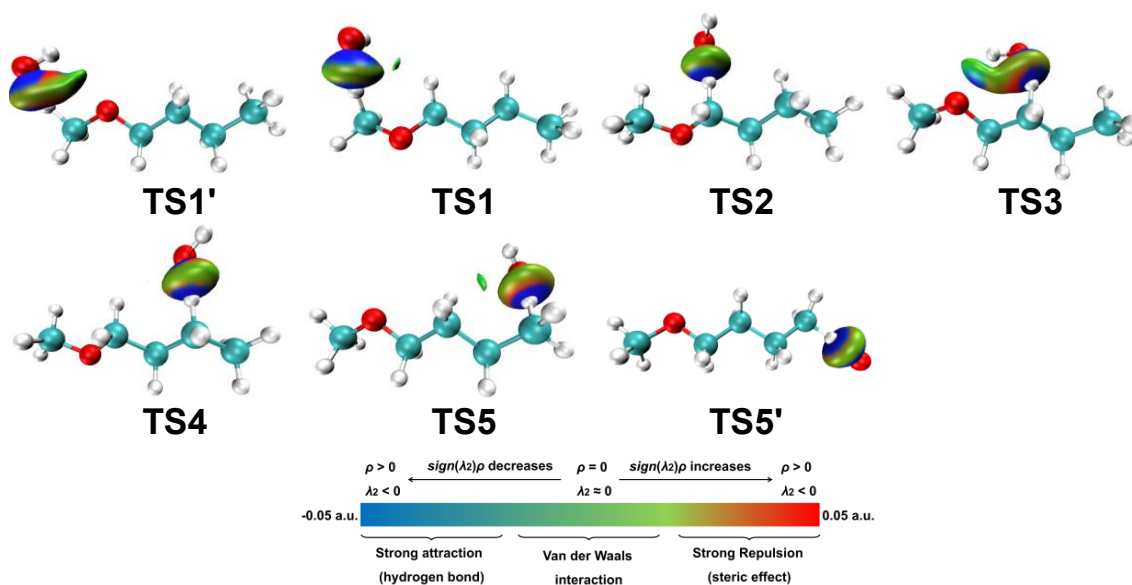

**Figure S54.** Intermolecular interaction of transition states in the reactions of  $\text{CH}_3\text{OCH}_2\text{CH}_2\text{CH}_2\text{CH}_3$  with  $\text{HO}$ . Blue indicates hydrogen bond; green denotes the vdW interaction; red represents the spatial potential resistance.

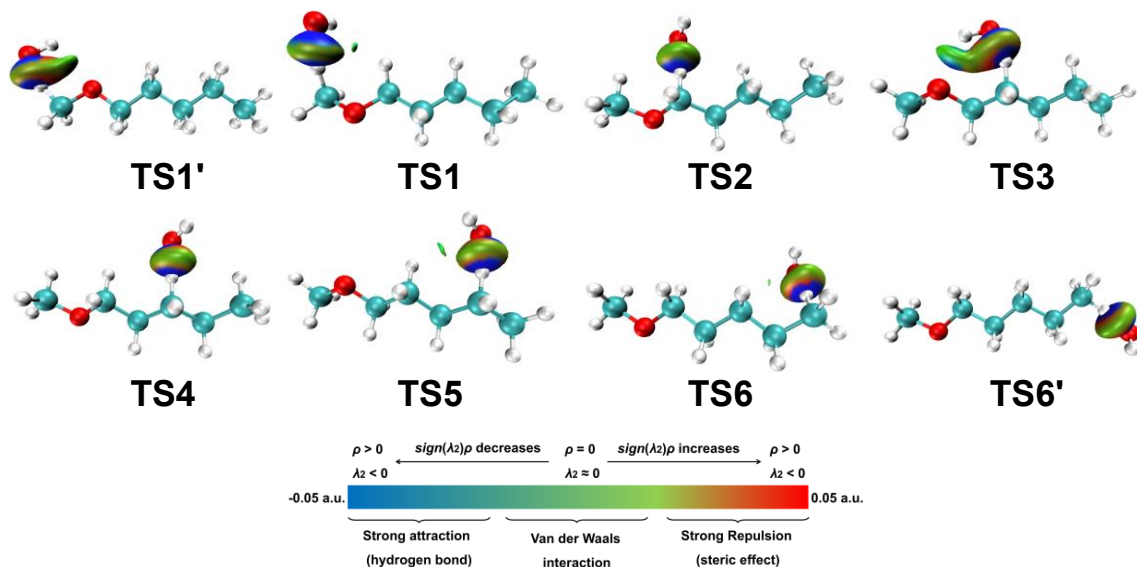

**Figure S55.** Intermolecular interaction of transition states in the reactions of  $\text{CH}_3\text{OCH}_2\text{CH}_2\text{CH}_2\text{CH}_2\text{CH}_3$  with  $\text{HO}$ . Blue indicates hydrogen bond; green denotes the vdW interaction; red represents the spatial potential resistance.

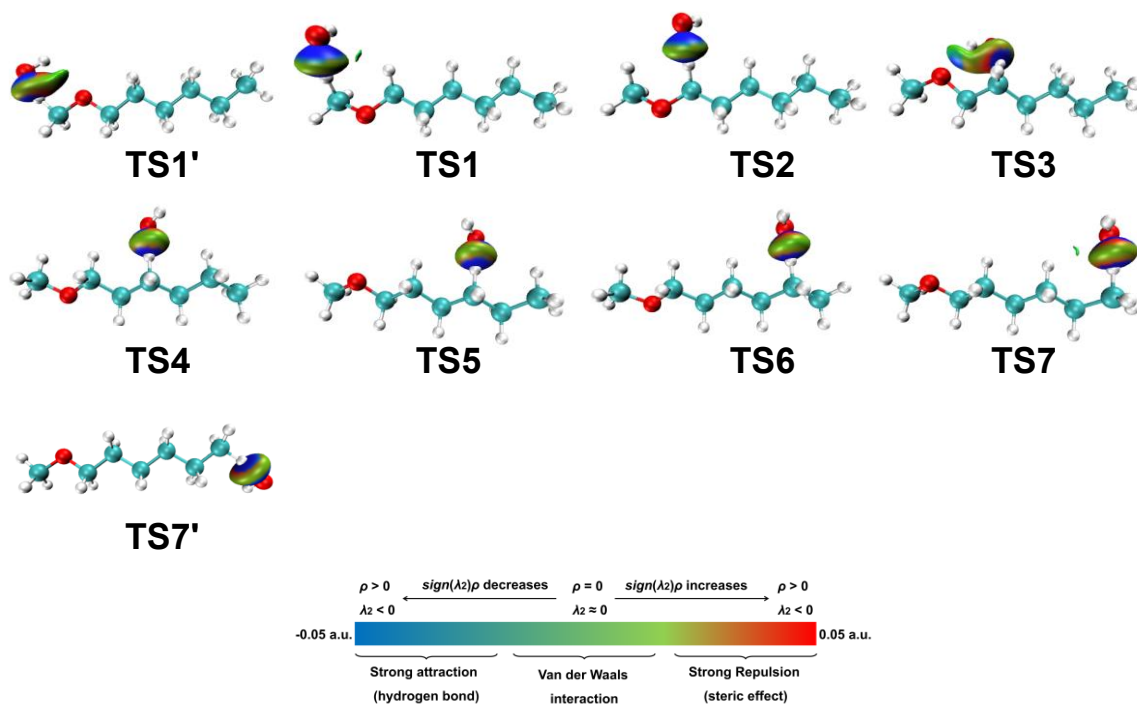

**Figure S56.** Intermolecular interaction of transition states in the reactions of  $\text{CH}_3\text{OCH}_2\text{CH}_2\text{CH}_2\text{CH}_2\text{CH}_2\text{CH}_3$  with  $\text{HO}$ . Blue indicates hydrogen bond; green denotes the vdW interaction; red represents the spatial potential resistance.

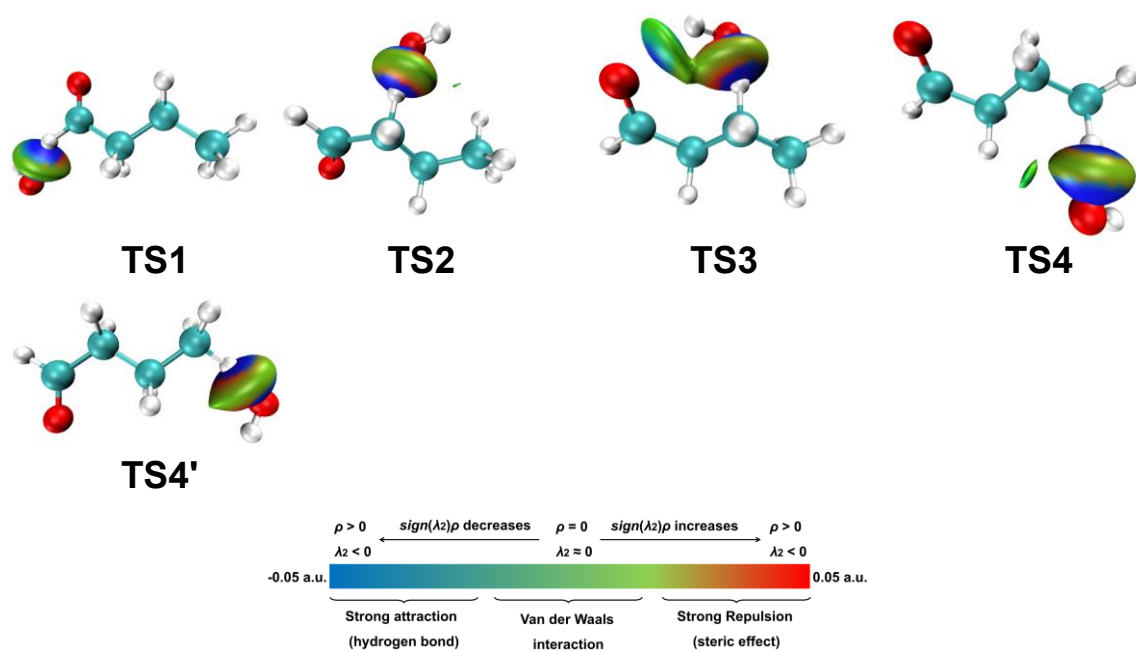

**Figure S57.** Intermolecular interaction of transition states in the reactions of  $\text{CH}_3\text{CH}_2\text{CH}_2\text{CHO}$  with  $\text{HO}\cdot$ . Blue indicates hydrogen bond; green denotes the vdW interaction; red represents the spatial potential resistance.

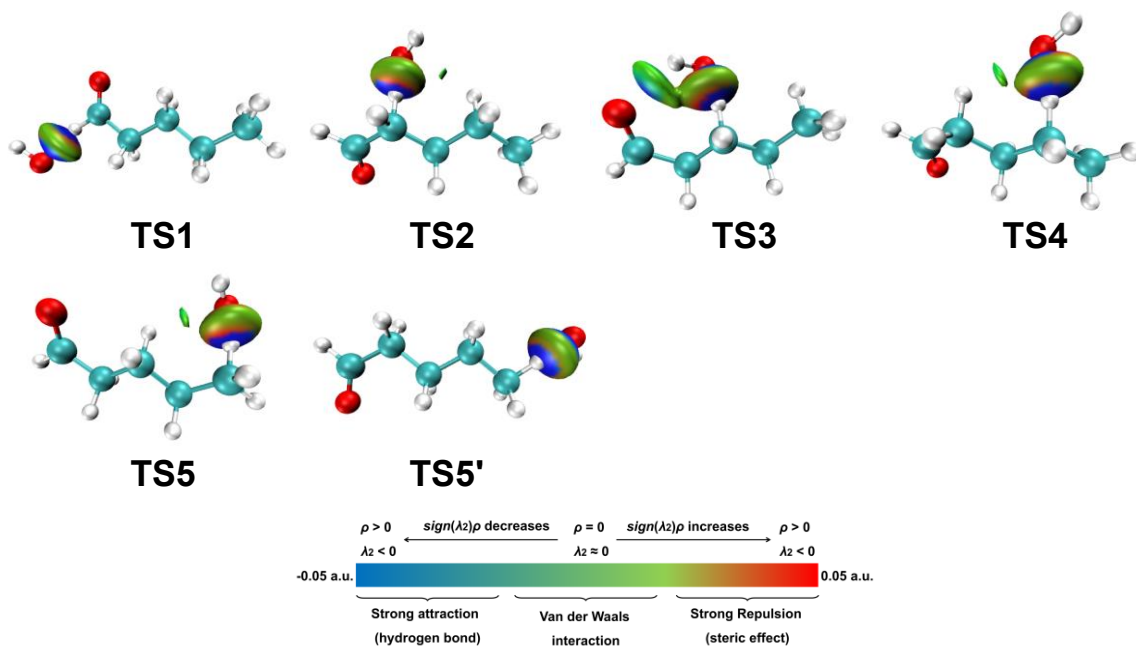

**Figure S58.** Intermolecular interaction of transition states in the reactions of  $\text{CH}_3\text{CH}_2\text{CH}_2\text{CH}_2\text{CHO}$  with  $\text{HO}\cdot$ . Blue indicates hydrogen bond; green denotes the vdW interaction; red represents the spatial potential resistance.

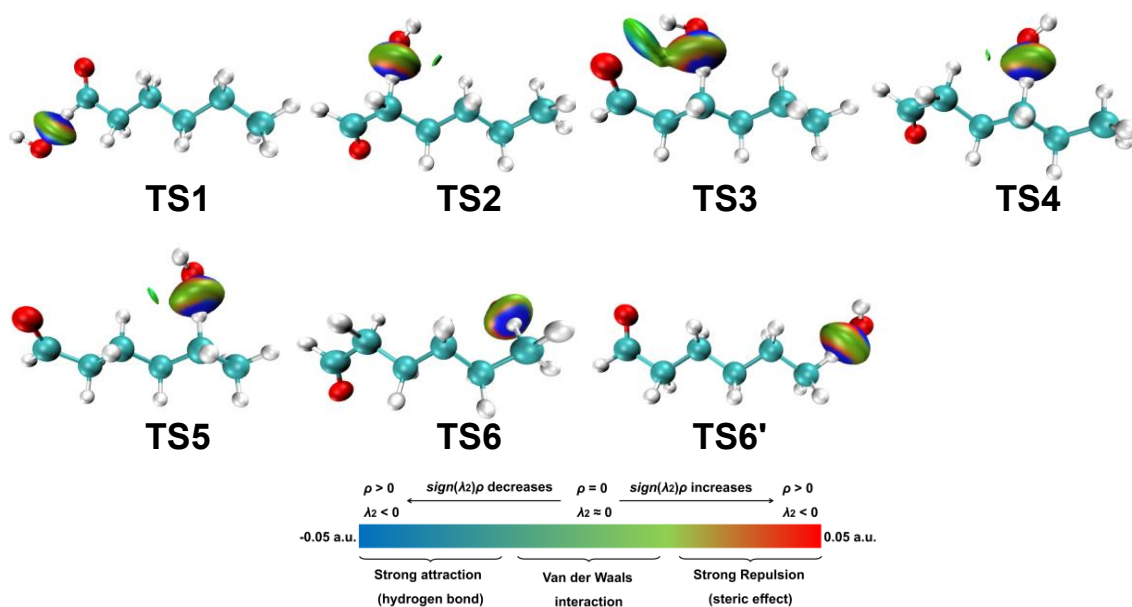

**Figure S59.** Intermolecular interaction of transition states in the reactions of  $\text{CH}_3\text{CH}_2\text{CH}_2\text{CH}_2\text{CH}_2\text{CHO}$  with  $\text{HO}\cdot$ . Blue indicates hydrogen bond; green denotes the vdW interaction; red represents the spatial potential resistance.

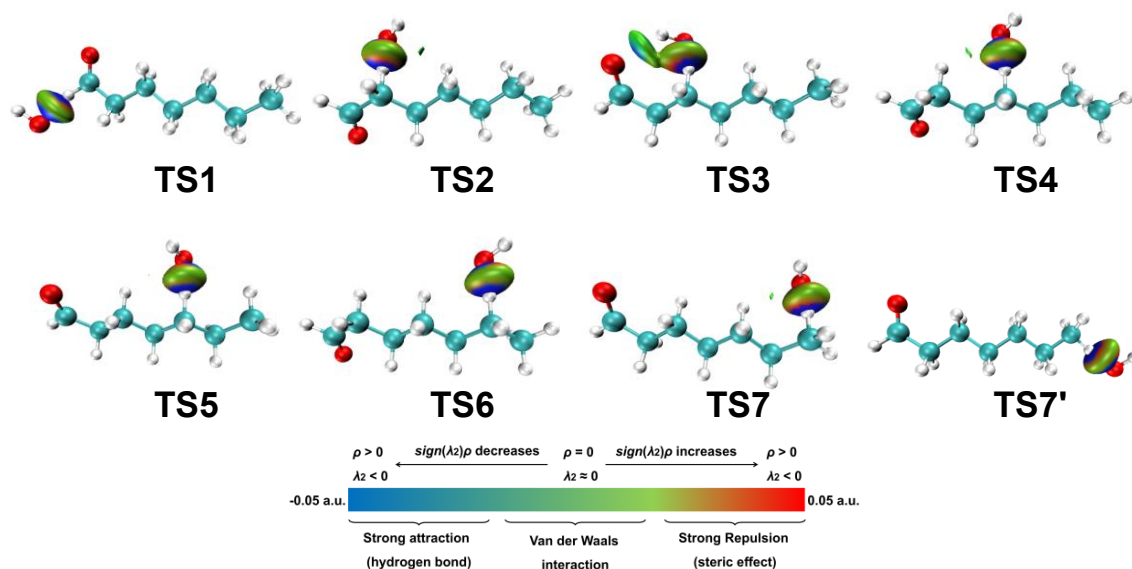

**Figure S60.** Intermolecular interaction of transition states in the reactions of  $\text{CH}_3\text{CH}_2\text{CH}_2\text{CH}_2\text{CH}_2\text{CH}_2\text{CHO}$  with  $\text{HO}\cdot$ . Blue indicates hydrogen bond; green denotes the vdW interaction; red represents the spatial potential resistance.

### S3 Potential energy surface of the H-abstraction reaction system

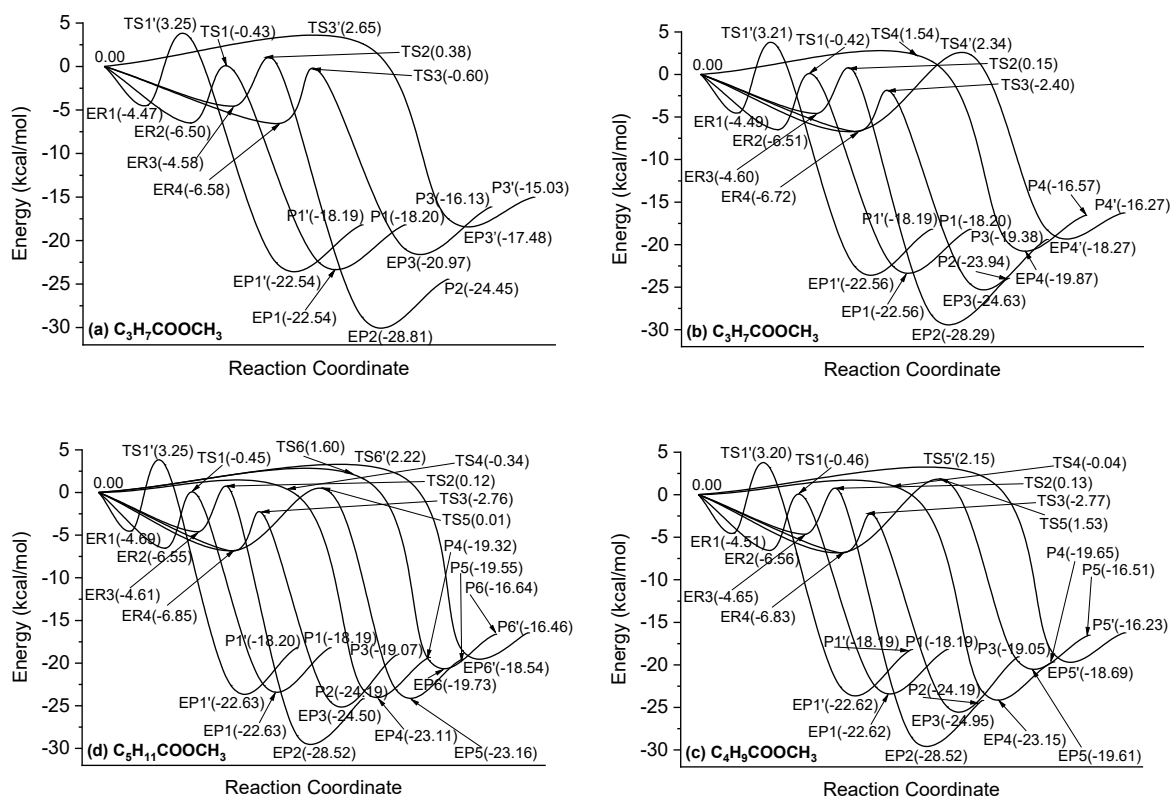

**Figure S61.** PES of the H-abstraction reactions of  $C_nH_{2n+1}COOCH_3$  ( $n = 2-5$ ) with  $\dot{H}O$  calculated at the M06-2X/6-311++G(d,p) level.

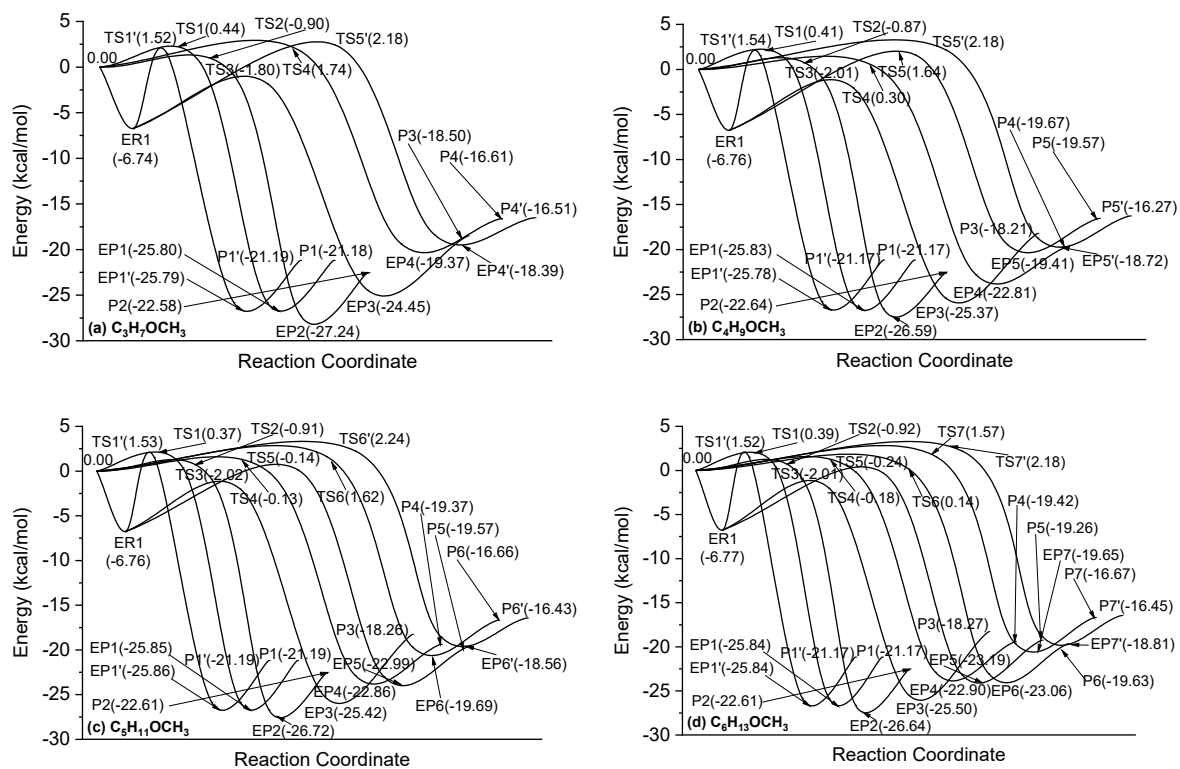

**Figure S62.** PES of the H-abstraction reactions of  $C_nH_{2n+1}OCH_3$  ( $n = 3-6$ ) with  $\dot{H}O$  calculated at the M06-2X/6-311++G (d, p) level.

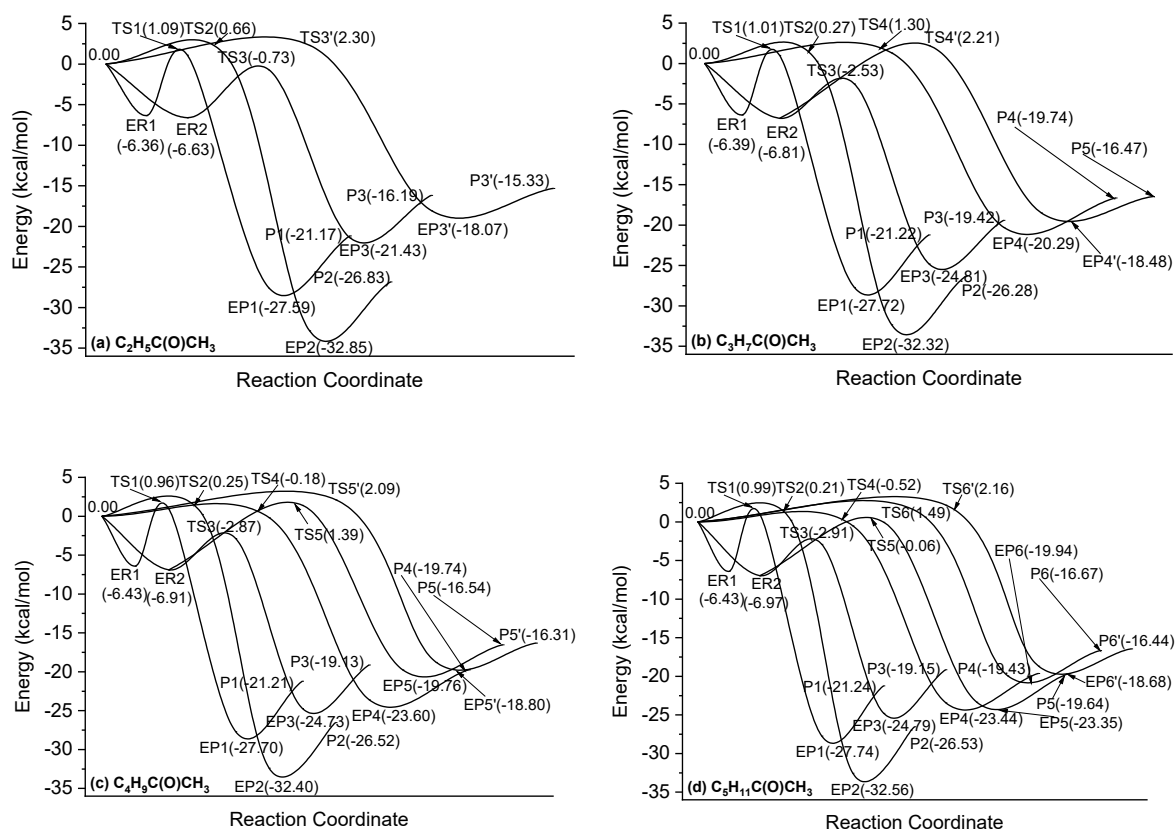

**Figure S63.** PES of the H-abstraction reactions of  $C_nH_{2n+1}C(O)CH_3$  ( $n = 2-5$ ) with  $HO$  calculated at the M06-2X/6-311++G (d, p) level.

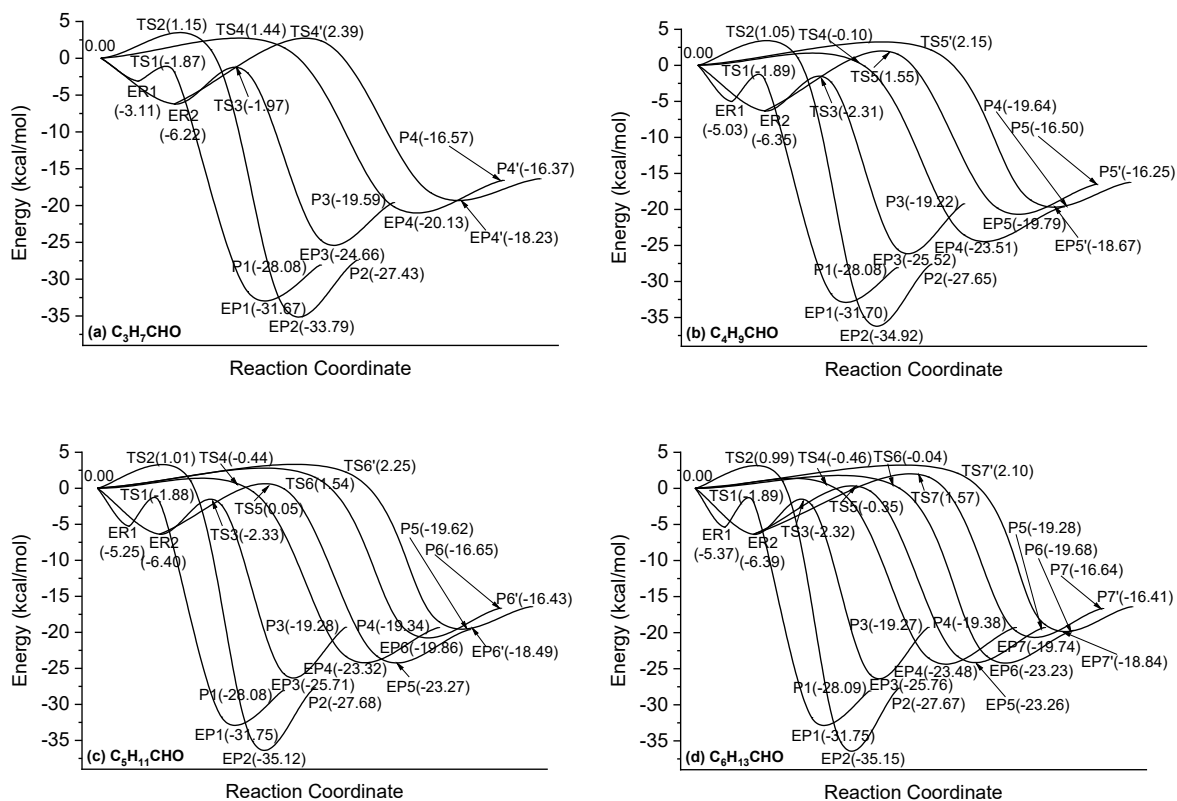

**Figure S64.** The PES of the H-abstraction reactions of  $C_nH_{2n+1}CHO$  ( $n = 3-6$ ) with  $\dot{H}O$  calculated at the M06-2X/6-311++G (d, p) level.

## S4 Individual reaction rates for H-abstraction reactions

To explore the competition among the H-abstraction reaction paths, the individual reaction rates for each H-abstraction reaction are compared in Figures S65–S68 in the Supporting Information. The reaction rates for the H-abstraction reactions in  $\text{CH}_3\text{COOC}_n\text{H}_{2n+1}$  ( $n = 2-5$ ) are categorized into eight types, i.e.,  $k_{R1'}$ ,  $k_{R1}$ ,  $k_{R2}$ ,  $k_{R3}$ ,  $k_{RS}$ ,  $k_{RE2}$ ,  $k_{RE1}$ , and  $k_{RE1'}$ . The reaction rates for the H-abstraction reactions in  $\text{C}_n\text{H}_{2n+1}\text{OCH}_3$  ( $n = 3-6$ ) fall into eight types, i.e.,  $k_{R1'}$ ,  $k_{R1}$ ,  $k_{R2}$ ,  $k_{R3}$ ,  $k_{RS}$ ,  $k_{RE2}$ ,  $k_{RE1}$ , and  $k_{RE1'}$ . The reaction rates for the H-abstraction reactions in  $\text{C}_n\text{H}_{2n+1}\text{C}(\text{O})\text{CH}_3$  ( $n = 2-5$ ) fall into seven types, i.e.,  $k_{R1}$ ,  $k_{R2}$ ,  $k_{R3}$ ,  $k_{RS}$ ,  $k_{RE2}$ ,  $k_{RE1}$ , and  $k_{RE1'}$ . And the reaction rates for the H-abstraction reactions in  $\text{C}_n\text{H}_{2n+1}\text{CHO}$  ( $n = 4-6$ ) fall into eight types, i.e.,  $k_{R1}$ ,  $k_{R2}$ ,  $k_{R3}$ ,  $k_{RS}$ ,  $k_{RE2}$ ,  $k_{RE1}$ , and  $k_{RE1'}$ .

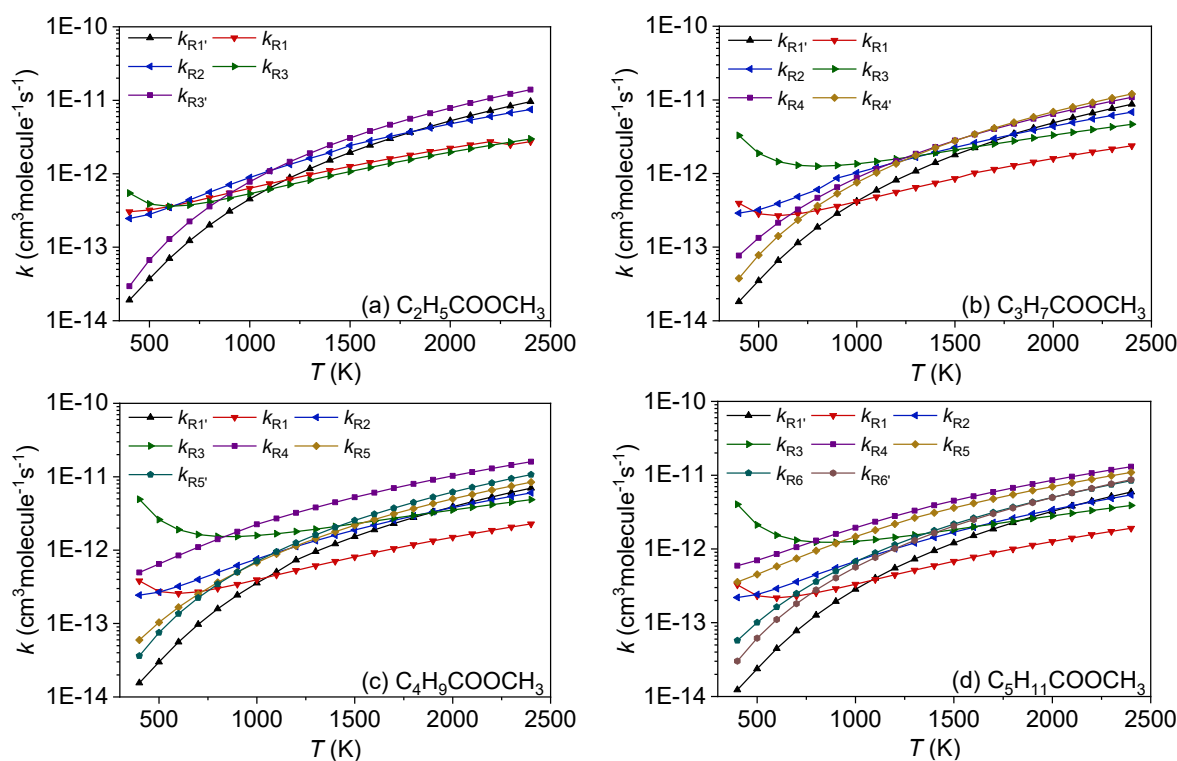

**Figure S65.** Individual reaction rates of  $\text{C}_n\text{H}_{2n+1}\text{COOCH}_3$  ( $n = 2-5$ ) over  $T = 400-2400$  K for (a)  $\text{C}_2\text{H}_5\text{COOCH}_3$ , (b)  $\text{C}_3\text{H}_7\text{COOCH}_3$ , (c)  $\text{C}_4\text{H}_9\text{COOCH}_3$ , and (d)  $\text{C}_5\text{H}_{11}\text{COOCH}_3$ .

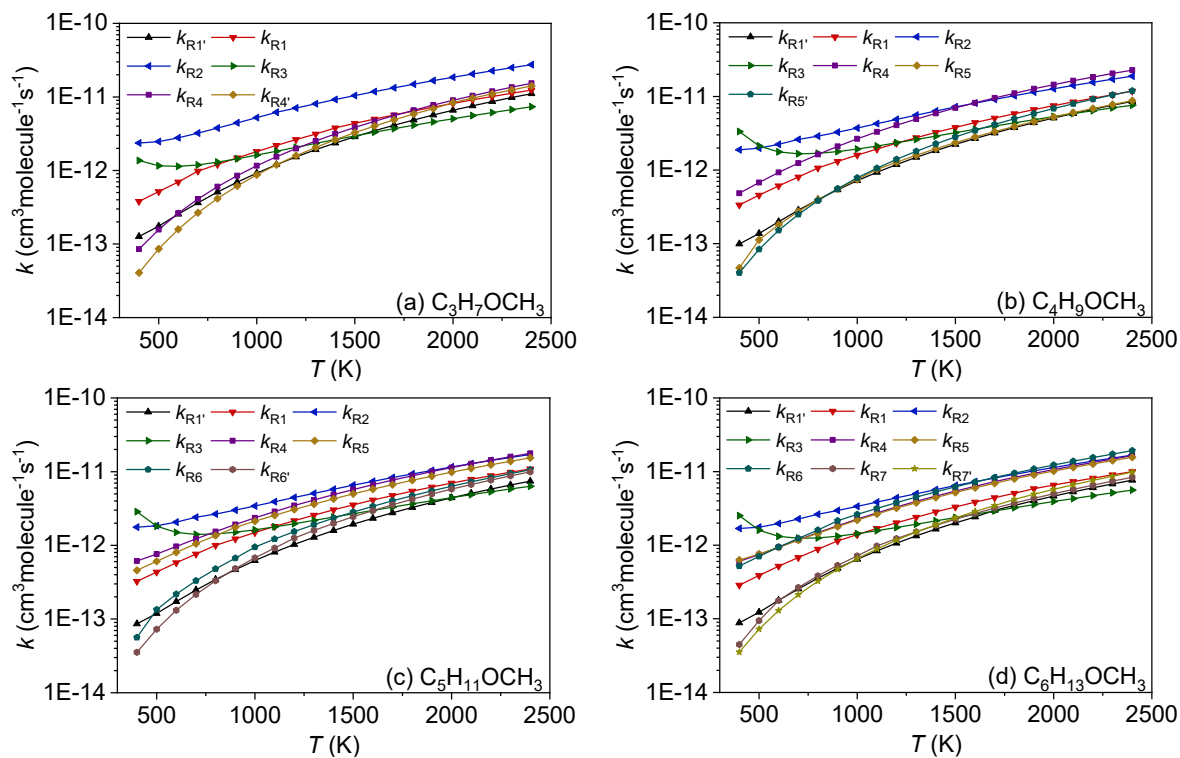

**Figure S66.** Individual reaction rates of  $\text{C}_n\text{H}_{2n+1}\text{OCH}_3$  ( $n = 3\text{--}6$ ) over  $T = 400\text{--}2400$  K for (a)  $\text{C}_3\text{H}_7\text{OCH}_3$ , (b)  $\text{C}_4\text{H}_9\text{OCH}_3$ , (c)  $\text{C}_5\text{H}_{11}\text{OCH}_3$ , and (d)  $\text{C}_6\text{H}_{13}\text{OCH}_3$ .

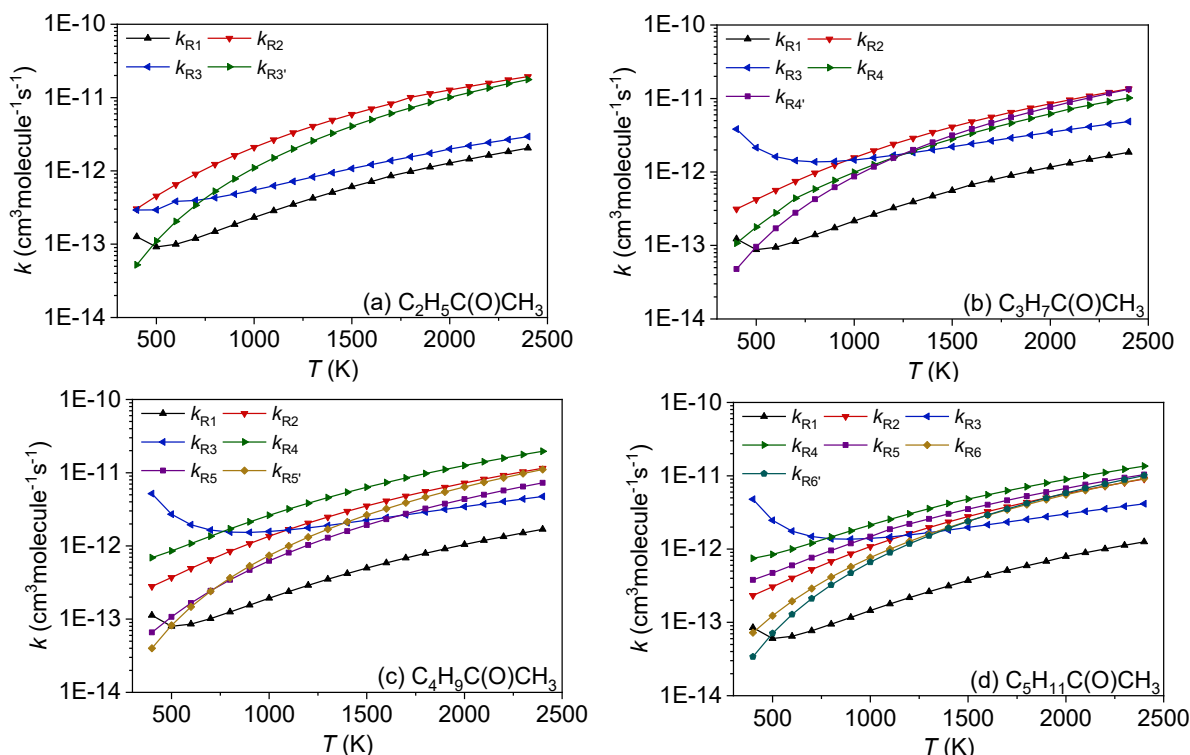

**Figure S67.** Individual reaction rates of  $\text{C}_n\text{H}_{2n+1}\text{C(O)CH}_3$  ( $n = 2\text{--}5$ ) over  $T = 400\text{--}2400$  K for (a)  $\text{C}_2\text{H}_5\text{C(O)CH}_3$ , (b)  $\text{C}_3\text{H}_7\text{C(O)CH}_3$ , (c)  $\text{C}_4\text{H}_9\text{C(O)CH}_3$ , and (d)  $\text{C}_5\text{H}_{11}\text{C(O)CH}_3$ .

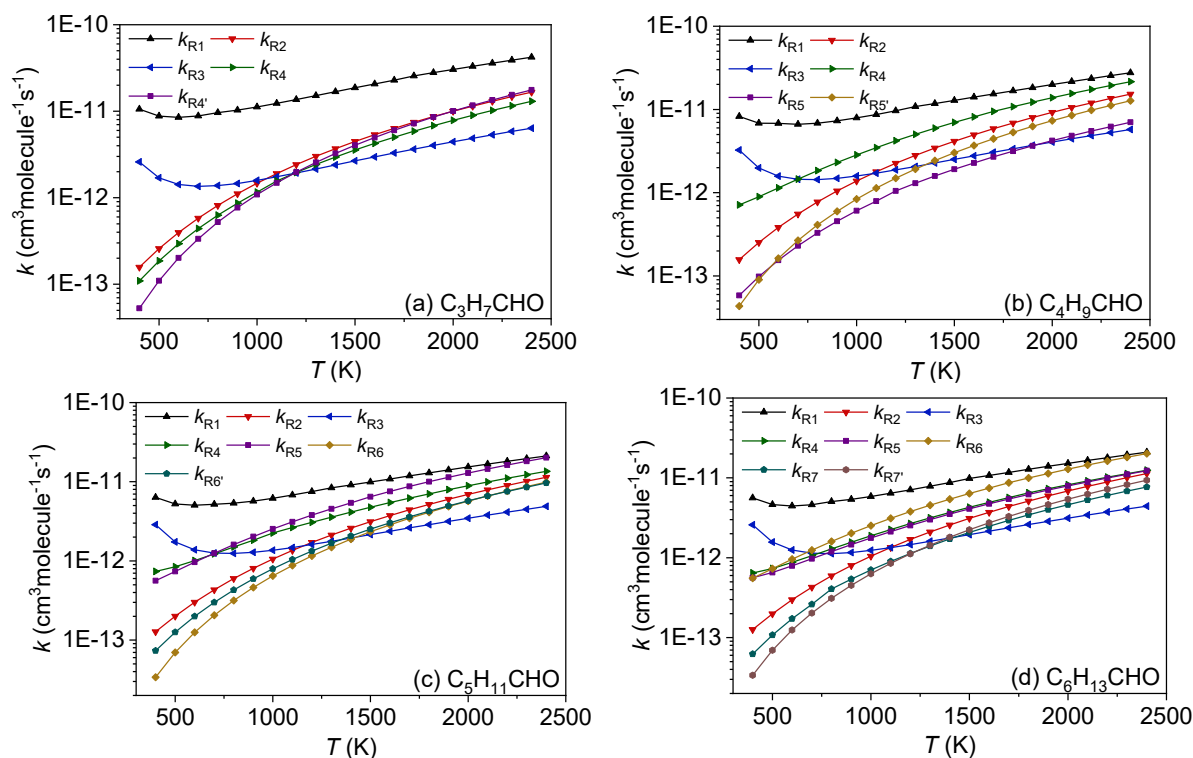

**Figure S68.** Individual reaction rates of  $C_nH_{2n+1}CHO$  ( $n = 3-6$ ) over  $T = 400-2400$  K for (a)  $C_3H_7CHO$ , (b)  $C_4H_9CHO$ , (c)  $C_5H_{11}CHO$ , and (d)  $C_6H_{13}CHO$ .

To quantitatively assess the consistency within each characteristic pathway type, Figure S69 is constructed, in which the average rate constants for each pathway type (solid lines) are presented along with their corresponding standard deviations (error bars). The average values are calculated from all individual reaction paths belonging to each type across different chain lengths. As shown in Figure S69, the relatively small error bars for each pathway type are observed, by which the high consistency of rate constants within each category is visually confirmed. Furthermore, based on the underlying raw data, the maximum relative deviation of each individual reaction path from its corresponding characteristic pathway average is computed. The results demonstrate that this maximum deviation is consistently found to be below 35% over the entire temperature range (400–2400 K). This 35% threshold is regarded as the upper bound of the intrinsic uncertainty within each pathway type and is widely recognized as a reasonable accuracy level in kinetic rate constant calculations<sup>1</sup>, by which its reliability as a benchmark for the classification scheme is supported. Consequently, the deviation between the rate constants predicted by our generalized rate rules and the explicitly calculated values is confirmed to be no more than 35%, by which the robustness and accuracy of the proposed classification are validated. Accordingly, this 35% threshold is also adopted as the criterion for identifying functional group effects in the comparative analysis between oxygenated

fuels and alkanes. Reaction pathways with relative deviations from the corresponding alkane rate constants within  $\pm 35\%$  are classified as alkane-like (i.e., are considered unaffected by the functional group), while those exceeding this threshold are identified as functionally influenced.

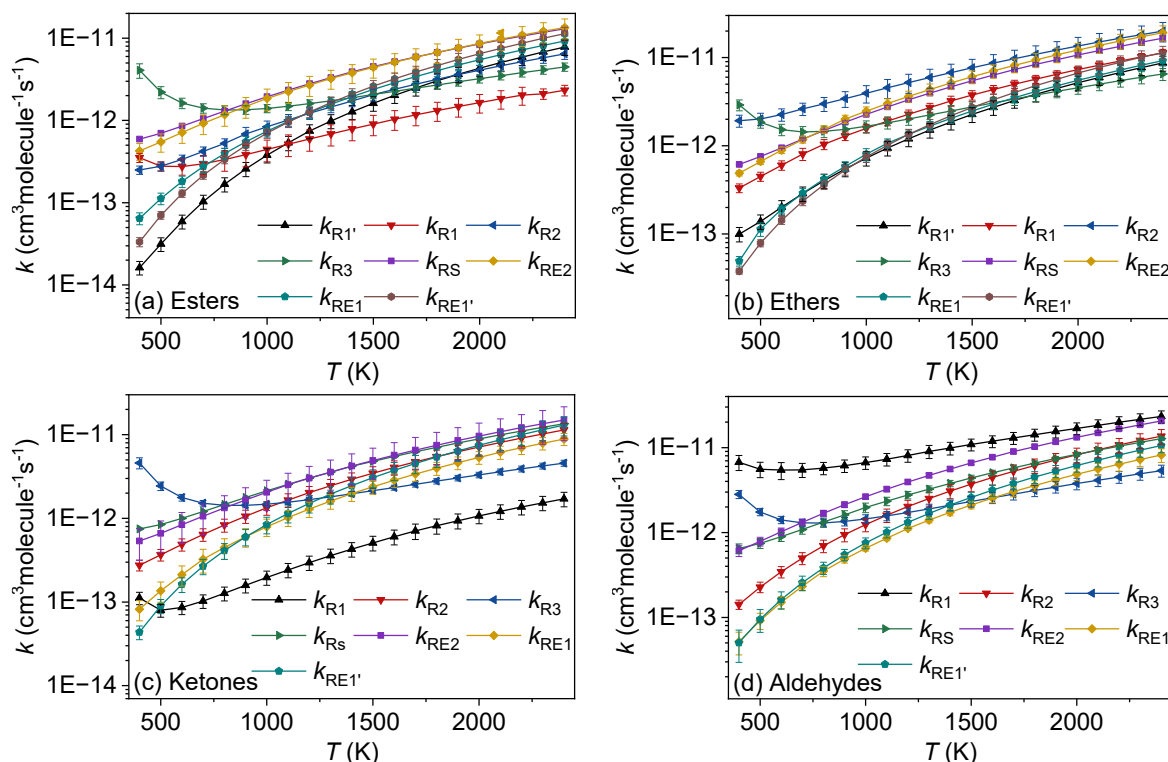

**Figure S69.** Characteristic reaction rates over  $T= 400\text{--}2400$  K for (a) esters, (b) ethers, (c) ketones, and (d) aldehydes. The solid lines represent the average rate constants calculated from all individual reaction paths belonging to each type across different chain lengths (C4–C7), and the error bars denote the corresponding standard deviations.

## S5 Computational workflow

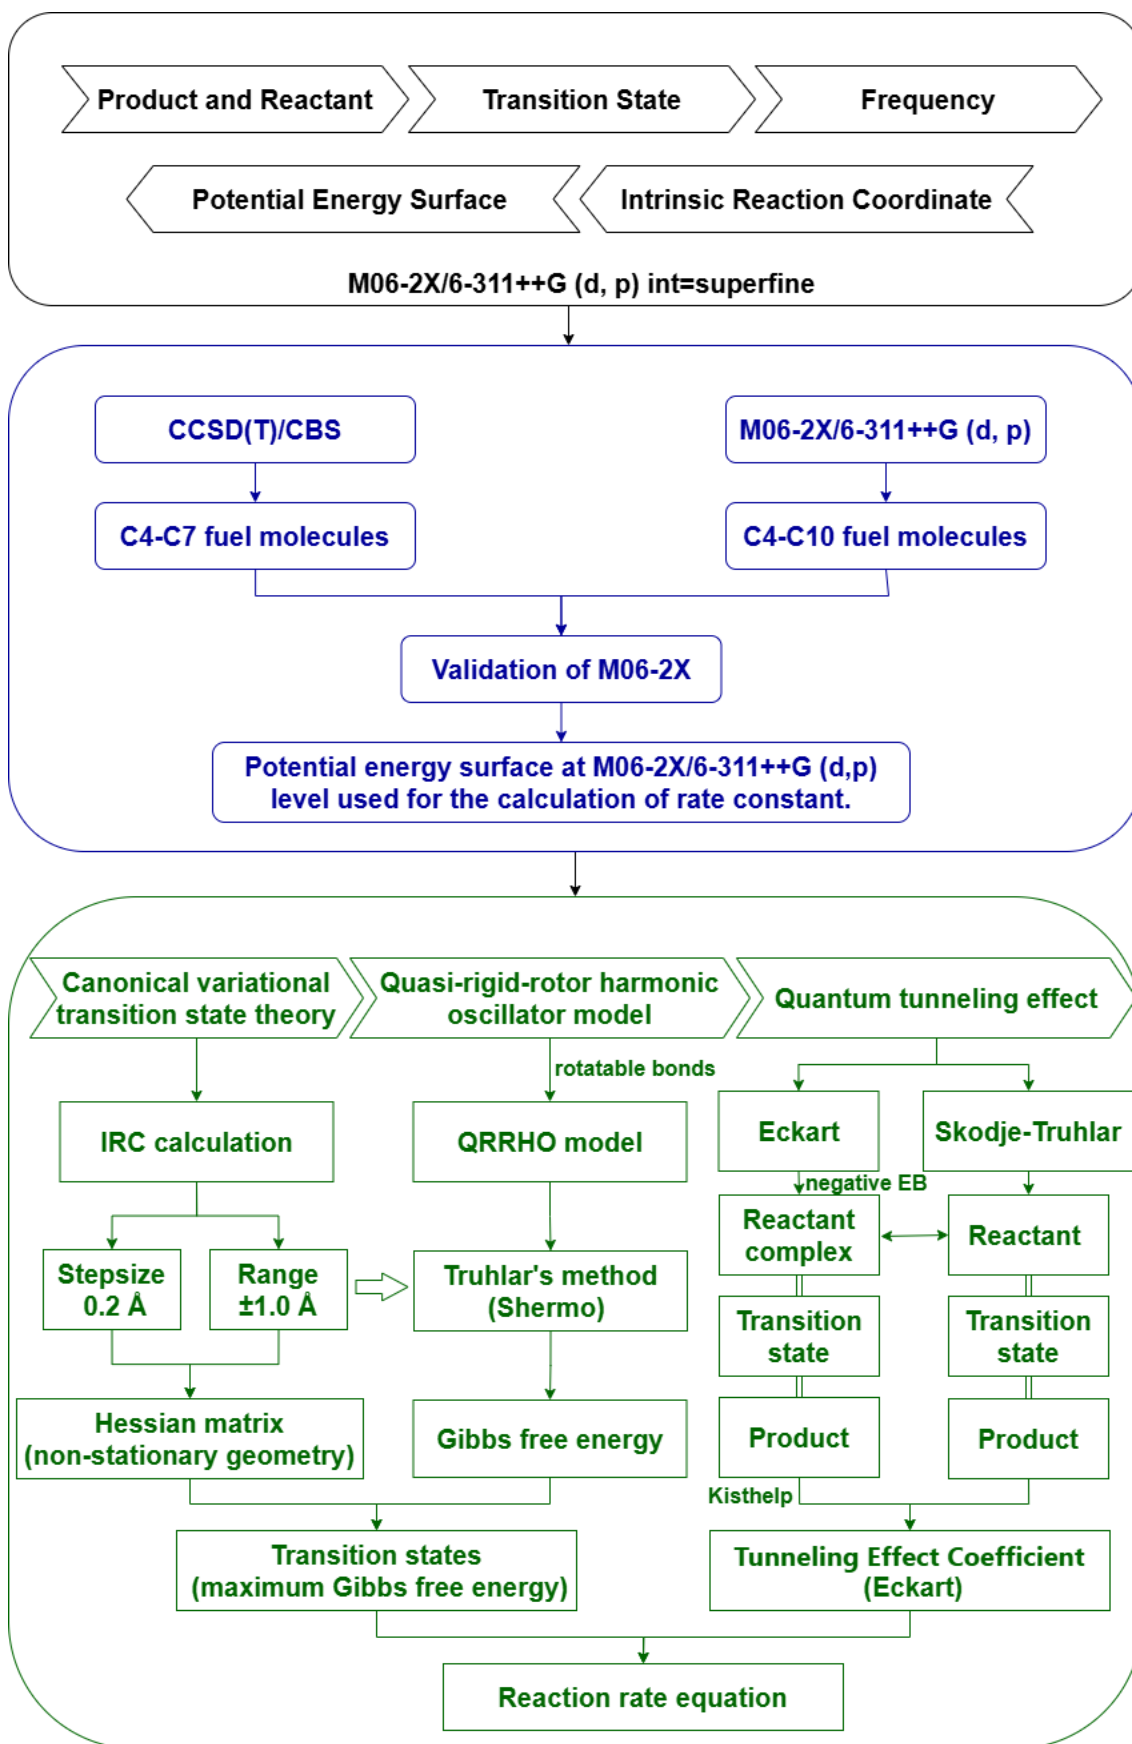

**Table S3.** Summary of computational methods applied to alkanes and oxygenated fuels

| Computational aspect         | Alkanes                | Oxygenated fuels       |
|------------------------------|------------------------|------------------------|
| Geometry optimization        | M06-2X/6-311++G (d, p) | M06-2X/6-311++G (d, p) |
| Frequency calculation        | M06-2X/6-311++G (d, p) | M06-2X/6-311++G (d, p) |
| Frequency scaling factor     | 0.983                  | 0.983                  |
| IRC analysis                 | M06-2X/6-311++G (d, p) | M06-2X/6-311++G (d, p) |
| Low-frequency mode treatment | Quasi-RRHO (Shermo)    | Quasi-RRHO (Shermo)    |
| High-level benchmark         | -                      | CCSD(T)/CBS (C4–C5)    |
| PES for kinetics             | M06-2X/6-311++G (d, p) | M06-2X/6-311++G (d, p) |
| Rate constant theory         | CVT + Eckart           | CVT + Eckart           |
| Temperature range            | 400–2400 K             | 400–2400 K             |

## S6 Vibrational frequencies of transition state structures

### 1. Esters

All frequencies are in  $\text{cm}^{-1}$ .

#### (1) $\text{C}_2\text{H}_5\text{C}(\text{O})\text{OCH}_3$

##### TS1'

|         |        |        |        |        |        |        |        |        |
|---------|--------|--------|--------|--------|--------|--------|--------|--------|
| -1264.4 | 21.0   | 53.9   | 78.1   | 133.3  | 164.5  | 189.1  | 220.4  | 303.6  |
| 321.0   | 444.8  | 577.5  | 644.3  | 733.3  | 814.4  | 882.7  | 924.2  | 1021.8 |
| 1067.9  | 1114.9 | 1131.9 | 1151.8 | 1229.2 | 1254.8 | 1280.3 | 1285.1 | 1397.8 |
| 1425.6  | 1467.0 | 1485.5 | 1498.7 | 1506.8 | 1531.2 | 1865.2 | 3081.2 | 3083.3 |
| 3106.4  | 3116.1 | 3160.1 | 3161.8 | 3194.7 | 3805.3 |        |        |        |

##### TS1

|         |        |        |        |        |        |        |        |        |
|---------|--------|--------|--------|--------|--------|--------|--------|--------|
| -1211.0 | 47.7   | 63.3   | 139.1  | 182.7  | 213.5  | 228.7  | 340.1  | 346.3  |
| 405.9   | 455.6  | 584.1  | 666.1  | 795.3  | 816.2  | 897.4  | 902.0  | 1016.6 |
| 1079.1  | 1116.3 | 1137.7 | 1141.7 | 1240.8 | 1256.0 | 1285.5 | 1374.2 | 1402.8 |
| 1427.0  | 1465.3 | 1471.9 | 1499.7 | 1504.6 | 1510.6 | 1844.4 | 3081.7 | 3083.7 |
| 3116.6  | 3117.2 | 3160.7 | 3161.6 | 3216.4 | 3765.7 |        |        |        |

##### TS2

|        |        |        |        |        |        |        |        |        |
|--------|--------|--------|--------|--------|--------|--------|--------|--------|
| -992.6 | 50.1   | 105.0  | 133.2  | 149.7  | 168.8  | 210.1  | 224.1  | 320.6  |
| 338.9  | 438.8  | 594.7  | 643.8  | 668.5  | 846.1  | 875.9  | 934.5  | 1030.1 |
| 1074.7 | 1097.2 | 1148.3 | 1187.7 | 1218.7 | 1246.4 | 1303.2 | 1363.4 | 1415.8 |
| 1480.1 | 1487.6 | 1491.9 | 1495.3 | 1510.5 | 1526.5 | 1859.0 | 3074.1 | 3089.1 |
| 3118.4 | 3145.8 | 3167.3 | 3167.6 | 3200.5 | 3782.4 |        |        |        |

##### TS3

|         |        |        |        |        |        |        |        |        |
|---------|--------|--------|--------|--------|--------|--------|--------|--------|
| -1172.0 | 39.4   | 108.0  | 148.4  | 162.3  | 180.1  | 215.5  | 344.0  | 359.1  |
| 440.8   | 460.5  | 584.7  | 661.1  | 763.2  | 850.4  | 920.2  | 945.8  | 1020.6 |
| 1066.1  | 1102.1 | 1143.3 | 1188.3 | 1219.4 | 1252.7 | 1274.3 | 1322.2 | 1410.9 |
| 1447.4  | 1454.9 | 1466.7 | 1489.8 | 1497.6 | 1509.4 | 1833.6 | 3074.7 | 3089.7 |
| 3108.8  | 3118.3 | 3167.3 | 3189.5 | 3203.9 | 3754.8 |        |        |        |

##### TS3'

|        |        |        |        |        |        |        |        |        |
|--------|--------|--------|--------|--------|--------|--------|--------|--------|
| -838.5 | 37.2   | 52.1   | 60.8   | 100.5  | 152.5  | 177.1  | 194.5  | 308.4  |
| 347.1  | 444.2  | 586.1  | 663.8  | 751.2  | 820.4  | 906.8  | 982.4  | 1036.6 |
| 1098.4 | 1115.7 | 1187.8 | 1205.1 | 1219.4 | 1252.8 | 1280.1 | 1316.2 | 1390.4 |
| 1410.4 | 1467.0 | 1479.7 | 1487.1 | 1496.7 | 1510.0 | 1849.7 | 3086.8 | 3089.2 |
| 3117.6 | 3127.6 | 3163.2 | 3187.7 | 3200.2 | 3807.0 |        |        |        |

#### (2) $\text{C}_3\text{H}_7\text{C}(\text{O})\text{OCH}_3$

##### TS1'

|         |        |        |        |        |        |        |        |        |
|---------|--------|--------|--------|--------|--------|--------|--------|--------|
| -1265.7 | 18.3   | 47.0   | 68.6   | 80.6   | 131.6  | 146.8  | 176.4  | 242.4  |
| 266.2   | 320.1  | 343.5  | 433.0  | 581.3  | 663.7  | 751.7  | 768.0  | 884.8  |
| 889.0   | 922.0  | 964.3  | 1070.4 | 1076.7 | 1130.3 | 1150.4 | 1152.3 | 1218.5 |
| 1253.8  | 1254.9 | 1280.7 | 1329.1 | 1338.6 | 1417.0 | 1423.9 | 1464.0 | 1485.5 |

|        |        |        |        |        |        |        |        |        |
|--------|--------|--------|--------|--------|--------|--------|--------|--------|
| 1496.0 | 1506.0 | 1512.6 | 1531.6 | 1864.1 | 3060.2 | 3067.8 | 3085.3 | 3099.7 |
| 3106.1 | 3116.8 | 3137.7 | 3142.7 | 3194.3 | 3805.2 |        |        |        |

**TS1**

|         |        |        |        |        |        |        |        |        |
|---------|--------|--------|--------|--------|--------|--------|--------|--------|
| -1207.5 | 42.2   | 50.0   | 99.7   | 125.0  | 165.7  | 201.7  | 247.1  | 312.3  |
| 345.8   | 350.0  | 407.0  | 445.9  | 588.4  | 704.2  | 753.1  | 811.7  | 889.0  |
| 900.1   | 920.4  | 942.3  | 1070.7 | 1090.1 | 1131.7 | 1142.3 | 1153.3 | 1234.9 |
| 1249.2  | 1255.7 | 1328.7 | 1341.8 | 1376.5 | 1418.2 | 1425.9 | 1462.2 | 1471.8 |
| 1496.5  | 1507.0 | 1508.4 | 1513.3 | 1843.1 | 3060.7 | 3068.4 | 3084.8 | 3100.0 |
| 3117.1  | 3117.2 | 3137.7 | 3143.3 | 3216.2 | 3766.8 |        |        |        |

**TS2**

|        |        |        |        |        |        |        |        |        |
|--------|--------|--------|--------|--------|--------|--------|--------|--------|
| -936.5 | 44.6   | 74.0   | 100.0  | 112.5  | 142.4  | 161.5  | 189.7  | 250.1  |
| 310.6  | 321.1  | 343.4  | 428.5  | 597.8  | 655.1  | 718.0  | 772.8  | 895.1  |
| 899.1  | 948.4  | 971.1  | 1060.2 | 1084.3 | 1123.3 | 1167.2 | 1187.9 | 1217.3 |
| 1238.4 | 1271.9 | 1314.6 | 1327.1 | 1395.4 | 1420.4 | 1479.2 | 1483.7 | 1495.9 |
| 1504.2 | 1508.0 | 1510.2 | 1511.9 | 1857.9 | 3063.0 | 3067.1 | 3089.0 | 3099.5 |
| 3114.1 | 3136.9 | 3146.5 | 3167.1 | 3200.3 | 3781.1 |        |        |        |

**TS3**

|        |        |        |        |        |        |        |        |        |
|--------|--------|--------|--------|--------|--------|--------|--------|--------|
| -832.7 | 34.9   | 81.8   | 125.6  | 151.6  | 154.4  | 168.0  | 191.6  | 231.7  |
| 318.6  | 346.8  | 432.7  | 454.9  | 594.5  | 681.1  | 726.7  | 767.0  | 906.3  |
| 934.2  | 944.7  | 1056.0 | 1062.9 | 1095.7 | 1139.9 | 1149.5 | 1187.8 | 1218.7 |
| 1256.1 | 1258.1 | 1313.3 | 1353.9 | 1410.7 | 1414.1 | 1447.1 | 1454.8 | 1489.2 |
| 1495.5 | 1497.0 | 1502.1 | 1509.5 | 1832.3 | 3053.1 | 3064.5 | 3089.4 | 3099.9 |
| 3111.8 | 3124.3 | 3151.7 | 3166.9 | 3203.2 | 3750.3 |        |        |        |

**TS4**

|        |        |        |        |        |        |        |        |        |
|--------|--------|--------|--------|--------|--------|--------|--------|--------|
| -748.3 | 30.7   | 53.3   | 81.6   | 104.4  | 123.7  | 150.7  | 157.4  | 184.8  |
| 320.9  | 324.7  | 350.5  | 443.9  | 593.6  | 691.6  | 719.5  | 786.2  | 888.6  |
| 916.1  | 939.0  | 1052.7 | 1068.8 | 1103.3 | 1141.1 | 1187.7 | 1200.4 | 1220.6 |
| 1248.1 | 1301.3 | 1322.6 | 1334.0 | 1360.8 | 1424.2 | 1441.3 | 1469.3 | 1485.0 |
| 1488.0 | 1491.2 | 1496.4 | 1510.5 | 1851.3 | 3065.3 | 3074.3 | 3085.8 | 3092.5 |
| 3107.9 | 3126.3 | 3161.1 | 3164.7 | 3198.0 | 3804.9 |        |        |        |

**TS4'**

|        |        |        |        |        |        |        |        |        |
|--------|--------|--------|--------|--------|--------|--------|--------|--------|
| -866.4 | 26.4   | 36.3   | 64.9   | 79.8   | 89.4   | 154.0  | 156.3  | 183.7  |
| 296.4  | 336.2  | 352.5  | 442.5  | 592.3  | 690.7  | 726.1  | 757.3  | 888.3  |
| 921.6  | 956.2  | 1035.4 | 1073.9 | 1092.1 | 1127.1 | 1187.9 | 1216.2 | 1238.5 |
| 1242.8 | 1278.0 | 1318.6 | 1329.9 | 1356.6 | 1416.0 | 1426.0 | 1465.1 | 1476.9 |
| 1487.1 | 1496.7 | 1503.0 | 1510.4 | 1853.1 | 3071.6 | 3080.1 | 3087.1 | 3092.0 |
| 3105.7 | 3126.0 | 3162.2 | 3163.2 | 3200.0 | 3804.2 |        |        |        |

**(3) C<sub>4</sub>H<sub>9</sub>C(O)OCH<sub>3</sub>****TS1'**

|         |        |        |        |        |        |        |        |        |
|---------|--------|--------|--------|--------|--------|--------|--------|--------|
| -1261.7 | 17.1   | 40.4   | 61.5   | 69.3   | 113.6  | 119.9  | 131.3  | 174.2  |
| 233.4   | 243.9  | 312.4  | 320.3  | 329.8  | 493.2  | 579.9  | 662.8  | 733.9  |
| 764.3   | 808.6  | 887.7  | 916.4  | 941.6  | 964.6  | 1043.9 | 1081.6 | 1093.9 |
| 1137.3  | 1149.3 | 1152.6 | 1215.1 | 1237.8 | 1254.4 | 1281.0 | 1301.1 | 1316.4 |
| 1332.9  | 1383.7 | 1417.5 | 1426.5 | 1463.9 | 1485.5 | 1491.6 | 1500.1 | 1504.7 |

|             |        |        |        |        |        |        |        |        |
|-------------|--------|--------|--------|--------|--------|--------|--------|--------|
| 1513.9      | 1531.4 | 1864.0 | 3048.3 | 3061.0 | 3066.4 | 3075.2 | 3078.7 | 3099.7 |
| 3106.1      | 3120.2 | 3132.4 | 3139.3 | 3194.1 | 3805.1 |        |        |        |
| <b>TS1</b>  |        |        |        |        |        |        |        |        |
| -1206.4     | 31.2   | 47.9   | 89.6   | 97.6   | 121.4  | 151.5  | 199.4  | 247.5  |
| 262.2       | 315.7  | 346.4  | 357.0  | 405.7  | 498.2  | 587.3  | 701.3  | 735.2  |
| 807.9       | 812.4  | 898.0  | 911.7  | 941.8  | 946.5  | 1046.0 | 1089.3 | 1098.1 |
| 1138.4      | 1142.7 | 1152.1 | 1231.7 | 1238.3 | 1247.7 | 1305.8 | 1316.5 | 1333.1 |
| 1374.0      | 1387.8 | 1417.6 | 1428.9 | 1462.0 | 1471.9 | 1491.9 | 1500.3 | 1505.2 |
| 1508.8      | 1514.4 | 1843.0 | 3048.9 | 3061.0 | 3066.6 | 3075.1 | 3079.3 | 3100.0 |
| 3117.0      | 3120.0 | 3132.4 | 3139.6 | 3216.0 | 3766.5 |        |        |        |
| <b>TS2</b>  |        |        |        |        |        |        |        |        |
| -934.7      | 40.7   | 66.6   | 72.1   | 94.1   | 111.4  | 148.0  | 163.3  | 187.3  |
| 247.2       | 270.6  | 309.6  | 314.7  | 358.2  | 465.1  | 601.4  | 663.4  | 717.1  |
| 745.6       | 830.4  | 905.5  | 927.6  | 939.5  | 966.0  | 1038.6 | 1076.5 | 1102.4 |
| 1137.4      | 1166.1 | 1188.0 | 1215.6 | 1233.4 | 1253.1 | 1294.7 | 1314.4 | 1330.3 |
| 1367.3      | 1409.5 | 1417.9 | 1478.5 | 1480.9 | 1496.2 | 1497.6 | 1505.3 | 1506.5 |
| 1511.0      | 1512.8 | 1857.8 | 3050.0 | 3057.1 | 3061.4 | 3084.6 | 3089.0 | 3099.9 |
| 3112.6      | 3131.7 | 3140.2 | 3167.0 | 3200.2 | 3781.1 |        |        |        |
| <b>TS3</b>  |        |        |        |        |        |        |        |        |
| -794.9      | 31.0   | 58.7   | 94.6   | 107.4  | 137.4  | 148.0  | 160.6  | 187.2  |
| 250.5       | 267.3  | 313.6  | 369.0  | 437.6  | 490.7  | 598.8  | 693.2  | 721.1  |
| 753.6       | 809.8  | 914.3  | 942.3  | 972.8  | 1036.3 | 1071.0 | 1093.3 | 1109.5 |
| 1140.8      | 1165.9 | 1188.0 | 1218.3 | 1238.8 | 1252.5 | 1293.0 | 1316.7 | 1334.8 |
| 1384.9      | 1403.6 | 1418.4 | 1436.0 | 1454.4 | 1485.5 | 1489.1 | 1497.2 | 1504.9 |
| 1509.3      | 1510.3 | 1831.8 | 3036.9 | 3063.8 | 3064.7 | 3079.0 | 3089.3 | 3096.7 |
| 3110.2      | 3135.9 | 3145.1 | 3166.8 | 3203.1 | 3747.5 |        |        |        |
| <b>TS4</b>  |        |        |        |        |        |        |        |        |
| -530.2      | 26.8   | 47.5   | 71.3   | 90.5   | 107.9  | 114.3  | 130.0  | 156.2  |
| 181.9       | 236.5  | 267.7  | 314.7  | 360.6  | 496.4  | 593.3  | 627.6  | 716.1  |
| 775.7       | 831.7  | 902.9  | 935.3  | 945.5  | 1039.6 | 1071.7 | 1089.7 | 1128.9 |
| 1149.1      | 1187.9 | 1196.7 | 1215.0 | 1232.5 | 1239.5 | 1303.9 | 1320.8 | 1366.6 |
| 1385.3      | 1412.7 | 1426.4 | 1469.7 | 1484.6 | 1489.0 | 1496.4 | 1496.6 | 1500.5 |
| 1510.8      | 1641.4 | 1851.2 | 3055.8 | 3059.6 | 3073.4 | 3075.1 | 3085.6 | 3102.6 |
| 3120.4      | 3125.3 | 3145.8 | 3160.7 | 3197.5 | 3800.7 |        |        |        |
| <b>TS5</b>  |        |        |        |        |        |        |        |        |
| -785.5      | 24.8   | 45.2   | 74.1   | 90.0   | 116.0  | 143.3  | 156.4  | 171.3  |
| 185.9       | 267.2  | 314.5  | 329.2  | 362.9  | 498.2  | 590.9  | 714.4  | 729.9  |
| 793.3       | 811.7  | 895.2  | 926.6  | 946.8  | 1038.8 | 1064.5 | 1093.7 | 1112.4 |
| 1142.0      | 1180.4 | 1188.1 | 1216.5 | 1232.5 | 1244.1 | 1298.1 | 1313.8 | 1330.4 |
| 1350.6      | 1389.0 | 1425.5 | 1450.1 | 1465.7 | 1478.1 | 1485.7 | 1486.9 | 1496.6 |
| 1506.3      | 1510.6 | 1852.1 | 3036.0 | 3066.6 | 3074.2 | 3083.4 | 3086.3 | 3095.2 |
| 3103.5      | 3124.3 | 3161.8 | 3162.4 | 3198.7 | 3799.7 |        |        |        |
| <b>TS5'</b> |        |        |        |        |        |        |        |        |
| -723.3      | 29.9   | 35.2   | 42.6   | 70.9   | 98.8   | 113.8  | 121.1  | 156.0  |
| 183.0       | 256.6  | 301.9  | 334.3  | 361.0  | 492.0  | 589.6  | 703.2  | 722.3  |

|        |        |        |        |        |        |        |        |        |
|--------|--------|--------|--------|--------|--------|--------|--------|--------|
| 738.7  | 811.9  | 923.5  | 935.2  | 983.3  | 1038.6 | 1061.6 | 1078.1 | 1113.3 |
| 1137.3 | 1187.8 | 1214.2 | 1224.1 | 1239.2 | 1244.9 | 1294.0 | 1313.7 | 1329.4 |
| 1335.5 | 1381.8 | 1422.2 | 1437.4 | 1465.2 | 1483.4 | 1487.5 | 1496.0 | 1496.5 |
| 1507.7 | 1510.6 | 1852.8 | 3058.9 | 3069.3 | 3078.0 | 3086.3 | 3090.6 | 3091.9 |
| 3104.9 | 3125.1 | 3158.2 | 3161.8 | 3198.5 | 3806.8 |        |        |        |

#### (4) C<sub>5</sub>H<sub>11</sub>C(O)OCH<sub>3</sub>

##### TS1'

|         |        |        |        |        |        |        |        |        |
|---------|--------|--------|--------|--------|--------|--------|--------|--------|
| -1261.7 | 10.8   | 38.2   | 50.2   | 54.5   | 97.1   | 108.3  | 126.2  | 155.4  |
| 182.3   | 194.3  | 247.1  | 265.1  | 302.7  | 320.9  | 411.9  | 500.6  | 580.6  |
| 663.4   | 729.6  | 764.7  | 766.3  | 857.5  | 888.1  | 912.9  | 965.4  | 977.2  |
| 1033.8  | 1067.9 | 1089.2 | 1097.1 | 1141.0 | 1151.8 | 1152.1 | 1212.9 | 1227.3 |
| 1254.8  | 1277.8 | 1280.8 | 1294.1 | 1331.5 | 1336.6 | 1350.3 | 1405.1 | 1416.0 |
| 1427.1  | 1463.8 | 1485.4 | 1489.0 | 1493.2 | 1504.6 | 1505.4 | 1514.2 | 1530.5 |
| 1863.9  | 3034.2 | 3053.8 | 3059.2 | 3064.7 | 3066.7 | 3075.6 | 3090.6 | 3100.7 |

##### TS1

|         |        |        |        |        |        |        |        |        |
|---------|--------|--------|--------|--------|--------|--------|--------|--------|
| -1205.6 | 30.0   | 37.2   | 71.2   | 77.7   | 110.0  | 135.1  | 143.2  | 201.1  |
| 211.9   | 246.1  | 275.9  | 335.1  | 346.2  | 402.4  | 419.2  | 505.3  | 587.2  |
| 702.3   | 730.9  | 765.9  | 811.1  | 857.8  | 898.2  | 908.9  | 945.0  | 977.6  |
| 1036.2  | 1071.9 | 1089.7 | 1105.2 | 1140.3 | 1144.1 | 1153.6 | 1227.6 | 1228.8 |
| 1246.7  | 1283.1 | 1294.0 | 1331.5 | 1337.0 | 1351.8 | 1376.2 | 1406.6 | 1415.9 |
| 1428.9  | 1462.0 | 1471.9 | 1489.5 | 1493.6 | 1504.7 | 1505.0 | 1509.1 | 1514.6 |
| 1842.9  | 3034.8 | 3053.7 | 3059.2 | 3065.2 | 3066.9 | 3075.5 | 3090.6 | 3101.0 |
| 3116.9  | 3121.4 | 3129.0 | 3137.4 | 3216.0 | 3766.7 |        |        |        |

##### TS2

|        |        |        |        |        |        |        |        |        |
|--------|--------|--------|--------|--------|--------|--------|--------|--------|
| -933.8 | 36.8   | 47.1   | 63.7   | 78.8   | 104.5  | 124.3  | 146.4  | 160.9  |
| 183.7  | 213.7  | 247.9  | 276.8  | 304.6  | 337.3  | 410.6  | 478.1  | 601.3  |
| 663.8  | 717.1  | 734.5  | 782.9  | 868.6  | 899.6  | 938.8  | 959.6  | 973.0  |
| 1032.3 | 1058.2 | 1090.9 | 1104.1 | 1142.3 | 1168.5 | 1187.8 | 1214.5 | 1230.1 |
| 1239.2 | 1277.7 | 1302.1 | 1321.8 | 1335.8 | 1340.6 | 1388.7 | 1416.1 | 1417.3 |
| 1478.4 | 1480.5 | 1491.5 | 1496.1 | 1500.9 | 1505.3 | 1507.2 | 1511.2 | 1513.7 |
| 1857.7 | 3038.9 | 3051.8 | 3056.0 | 3059.6 | 3071.4 | 3088.9 | 3090.2 | 3100.8 |
| 3113.4 | 3129.6 | 3137.3 | 3167.0 | 3200.1 | 3780.9 |        |        |        |

##### TS3

|        |        |        |        |        |        |        |        |        |
|--------|--------|--------|--------|--------|--------|--------|--------|--------|
| -795.9 | 31.4   | 49.3   | 67.7   | 79.9   | 115.6  | 144.5  | 155.6  | 162.4  |
| 189.4  | 216.6  | 246.3  | 280.7  | 344.8  | 409.2  | 446.4  | 496.3  | 598.2  |
| 698.4  | 721.7  | 749.0  | 770.7  | 868.7  | 906.3  | 941.8  | 988.0  | 1028.5 |
| 1066.3 | 1086.2 | 1100.9 | 1106.7 | 1146.9 | 1166.6 | 1187.9 | 1218.1 | 1228.9 |
| 1248.6 | 1273.0 | 1297.0 | 1324.5 | 1337.4 | 1359.9 | 1402.4 | 1405.5 | 1416.4 |
| 1435.3 | 1454.4 | 1481.7 | 1489.3 | 1497.0 | 1498.0 | 1505.7 | 1509.6 | 1512.2 |
| 1831.7 | 3023.1 | 3056.1 | 3058.9 | 3064.7 | 3067.9 | 3089.4 | 3094.2 | 3100.1 |

##### TS4

|        |       |       |       |       |       |       |       |        |
|--------|-------|-------|-------|-------|-------|-------|-------|--------|
| -496.4 | 26.4  | 44.1  | 56.6  | 71.6  | 84.4  | 113.0 | 121.9 | 137.6  |
| 158.2  | 185.8 | 206.7 | 253.3 | 276.3 | 341.3 | 418.6 | 504.0 | 593.0  |
| 624.9  | 716.9 | 762.5 | 780.2 | 879.9 | 906.5 | 941.1 | 973.4 | 1031.7 |

|        |        |        |        |        |        |        |        |        |
|--------|--------|--------|--------|--------|--------|--------|--------|--------|
| 1060.6 | 1092.9 | 1096.1 | 1134.7 | 1151.1 | 1187.7 | 1204.2 | 1215.2 | 1227.5 |
| 1237.8 | 1285.9 | 1297.1 | 1328.2 | 1340.7 | 1368.7 | 1399.4 | 1413.0 | 1426.2 |
| 1469.1 | 1482.3 | 1486.8 | 1492.9 | 1495.9 | 1504.7 | 1509.8 | 1510.8 | 1651.2 |
| 1851.3 | 3045.0 | 3058.1 | 3059.9 | 3060.7 | 3073.3 | 3085.6 | 3091.3 | 3102.7 |
| 3120.7 | 3128.8 | 3140.3 | 3160.8 | 3197.5 | 3798.1 |        |        |        |

**TS5**

|        |        |        |        |        |        |        |        |        |
|--------|--------|--------|--------|--------|--------|--------|--------|--------|
| -540.5 | 23.2   | 39.4   | 63.8   | 74.3   | 93.8   | 120.9  | 128.5  | 152.0  |
| 159.7  | 185.4  | 208.4  | 238.6  | 276.6  | 341.2  | 412.2  | 505.8  | 590.7  |
| 636.8  | 715.4  | 740.9  | 804.1  | 874.0  | 910.4  | 941.6  | 973.2  | 1031.1 |
| 1067.9 | 1089.6 | 1096.5 | 1136.4 | 1149.6 | 1188.0 | 1214.3 | 1219.1 | 1235.5 |
| 1242.8 | 1282.1 | 1303.1 | 1323.2 | 1340.1 | 1348.3 | 1399.9 | 1411.3 | 1426.2 |
| 1465.9 | 1481.3 | 1486.9 | 1495.1 | 1496.7 | 1499.8 | 1505.6 | 1510.8 | 1582.1 |
| 1851.9 | 3028.2 | 3054.7 | 3066.2 | 3068.7 | 3075.1 | 3085.7 | 3086.2 | 3102.4 |
| 3122.8 | 3123.8 | 3147.6 | 3161.7 | 3198.5 | 3794.9 |        |        |        |

**TS6**

|        |        |        |        |        |        |        |        |        |
|--------|--------|--------|--------|--------|--------|--------|--------|--------|
| -740.0 | 23.5   | 36.7   | 56.0   | 81.7   | 84.4   | 89.7   | 124.3  | 151.3  |
| 161.0  | 184.5  | 211.6  | 277.1  | 321.6  | 340.7  | 417.8  | 505.9  | 589.6  |
| 715.1  | 720.2  | 748.9  | 796.7  | 864.6  | 895.9  | 934.1  | 978.9  | 1027.1 |
| 1060.8 | 1085.3 | 1093.3 | 1124.4 | 1143.1 | 1185.6 | 1187.9 | 1215.1 | 1232.4 |
| 1241.8 | 1280.6 | 1291.0 | 1323.9 | 1332.1 | 1347.2 | 1359.4 | 1406.2 | 1427.2 |
| 1457.0 | 1465.0 | 1481.7 | 1486.4 | 1493.3 | 1496.4 | 1502.0 | 1510.1 | 1511.1 |
| 1853.5 | 3034.0 | 3039.8 | 3066.6 | 3073.4 | 3077.1 | 3085.8 | 3087.2 | 3096.6 |
| 3102.8 | 3122.1 | 3159.2 | 3161.1 | 3197.8 | 3804.9 |        |        |        |

**TS6'**

|        |        |        |        |        |        |        |        |        |
|--------|--------|--------|--------|--------|--------|--------|--------|--------|
| -799.7 | 22.9   | 43.6   | 48.5   | 57.9   | 73.7   | 100.6  | 127.4  | 131.1  |
| 157.2  | 184.7  | 195.4  | 273.3  | 333.4  | 346.5  | 400.8  | 500.5  | 590.3  |
| 707.8  | 727.1  | 734.1  | 771.7  | 859.2  | 919.4  | 942.2  | 978.7  | 1020.0 |
| 1061.1 | 1064.1 | 1086.9 | 1117.1 | 1140.2 | 1188.1 | 1213.3 | 1219.5 | 1231.7 |
| 1266.6 | 1284.4 | 1310.7 | 1331.8 | 1332.4 | 1336.2 | 1367.5 | 1399.7 | 1425.9 |
| 1437.1 | 1465.5 | 1477.1 | 1486.5 | 1491.8 | 1496.7 | 1497.1 | 1510.4 | 1511.1 |
| 1853.4 | 3039.3 | 3053.3 | 3067.8 | 3071.7 | 3076.5 | 3086.2 | 3089.0 | 3096.2 |
| 3103.5 | 3123.2 | 3157.9 | 3161.8 | 3198.6 | 3805.6 |        |        |        |

**(5) C<sub>6</sub>H<sub>13</sub>C(O)OH**

**TS1**

|         |        |        |        |        |        |        |        |        |
|---------|--------|--------|--------|--------|--------|--------|--------|--------|
| -1774.1 | 18.8   | 39.4   | 61.4   | 71.9   | 98.7   | 139.0  | 148.9  | 150.5  |
| 224.9   | 246.3  | 250.2  | 338.1  | 398.4  | 425.4  | 457.8  | 494.7  | 582.5  |
| 637.4   | 729.7  | 745.2  | 757.6  | 806.5  | 896.2  | 907.8  | 918.5  | 946.0  |
| 1001.4  | 1035.6 | 1060.7 | 1081.9 | 1092.0 | 1137.8 | 1141.3 | 1179.3 | 1220.1 |
| 1252.4  | 1276.1 | 1308.1 | 1318.8 | 1333.4 | 1338.6 | 1362.2 | 1399.3 | 1413.6 |
| 1416.9  | 1462.9 | 1488.6 | 1489.4 | 1497.6 | 1504.9 | 1507.4 | 1514.8 | 1583.4 |
| 1790.3  | 3035.4 | 3041.4 | 3052.7 | 3059.3 | 3063.4 | 3073.5 | 3077.0 | 3082.9 |
| 3095.6  | 3110.6 | 3129.1 | 3130.8 | 3136.8 | 3723.9 |        |        |        |

**TS2**

|        |      |      |      |      |       |       |       |       |
|--------|------|------|------|------|-------|-------|-------|-------|
| -957.2 | 39.9 | 47.6 | 54.6 | 68.6 | 105.8 | 122.5 | 127.3 | 167.9 |
|--------|------|------|------|------|-------|-------|-------|-------|

|        |        |        |        |        |        |        |        |        |
|--------|--------|--------|--------|--------|--------|--------|--------|--------|
| 189.6  | 247.5  | 256.6  | 291.8  | 354.3  | 453.0  | 486.9  | 533.0  | 640.6  |
| 649.6  | 672.3  | 731.4  | 753.7  | 818.3  | 885.4  | 903.5  | 923.2  | 955.9  |
| 997.3  | 1040.1 | 1066.7 | 1090.3 | 1099.0 | 1142.3 | 1155.6 | 1185.6 | 1227.5 |
| 1251.2 | 1284.8 | 1293.6 | 1311.8 | 1333.6 | 1335.2 | 1341.5 | 1376.6 | 1403.3 |
| 1415.3 | 1419.9 | 1478.4 | 1489.5 | 1494.0 | 1498.6 | 1505.0 | 1505.4 | 1514.6 |
| 1878.7 | 3035.7 | 3042.4 | 3052.6 | 3055.2 | 3058.9 | 3065.0 | 3079.8 | 3094.1 |
| 3102.2 | 3114.7 | 3128.7 | 3136.4 | 3780.8 | 3829.8 |        |        |        |

**TS3**

|        |        |        |        |        |        |        |        |        |
|--------|--------|--------|--------|--------|--------|--------|--------|--------|
| -788.0 | 38.9   | 44.2   | 60.2   | 70.5   | 102.5  | 141.4  | 150.2  | 158.4  |
| 201.1  | 247.2  | 258.4  | 348.3  | 429.8  | 452.1  | 498.2  | 537.0  | 651.5  |
| 666.0  | 696.9  | 736.5  | 762.6  | 805.6  | 901.8  | 911.7  | 919.3  | 1005.7 |
| 1041.1 | 1061.7 | 1088.0 | 1096.2 | 1107.9 | 1146.1 | 1166.7 | 1199.0 | 1222.6 |
| 1254.9 | 1273.7 | 1299.7 | 1309.3 | 1330.9 | 1337.5 | 1348.1 | 1389.1 | 1413.8 |
| 1415.9 | 1418.0 | 1446.3 | 1454.6 | 1481.6 | 1491.9 | 1501.7 | 1504.7 | 1513.9 |
| 1855.2 | 3024.3 | 3041.8 | 3051.2 | 3059.5 | 3064.9 | 3066.8 | 3076.5 | 3095.2 |
| 3100.1 | 3110.2 | 3129.9 | 3136.7 | 3755.2 | 3825.8 |        |        |        |

**TS4**

|        |        |        |        |        |        |        |        |        |
|--------|--------|--------|--------|--------|--------|--------|--------|--------|
| -504.5 | 30.2   | 48.2   | 54.3   | 60.7   | 73.4   | 90.9   | 130.7  | 135.3  |
| 166.2  | 193.0  | 246.7  | 256.8  | 351.1  | 456.6  | 510.4  | 520.4  | 625.5  |
| 648.0  | 653.1  | 740.2  | 777.7  | 818.2  | 900.2  | 908.7  | 918.8  | 995.4  |
| 1038.4 | 1070.7 | 1086.7 | 1094.6 | 1136.0 | 1144.0 | 1182.9 | 1201.3 | 1223.5 |
| 1260.9 | 1280.3 | 1295.2 | 1319.0 | 1334.2 | 1340.4 | 1363.8 | 1387.2 | 1409.7 |
| 1416.2 | 1440.3 | 1467.1 | 1480.0 | 1491.2 | 1497.9 | 1505.4 | 1511.7 | 1643.0 |
| 1872.1 | 3031.2 | 3048.7 | 3060.1 | 3060.8 | 3061.2 | 3072.9 | 3074.4 | 3093.6 |
| 3102.6 | 3120.6 | 3130.5 | 3138.2 | 3797.7 | 3832.6 |        |        |        |

**TS5**

|        |        |        |        |        |        |        |        |        |
|--------|--------|--------|--------|--------|--------|--------|--------|--------|
| -523.6 | 25.6   | 42.6   | 57.9   | 75.0   | 79.4   | 83.0   | 124.4  | 132.3  |
| 159.7  | 193.9  | 249.5  | 257.2  | 353.5  | 456.8  | 513.4  | 523.2  | 632.2  |
| 650.5  | 653.7  | 739.9  | 776.6  | 813.4  | 898.9  | 908.7  | 928.1  | 1001.4 |
| 1041.7 | 1062.0 | 1089.6 | 1099.2 | 1138.1 | 1144.9 | 1184.1 | 1212.5 | 1233.2 |
| 1257.9 | 1286.6 | 1299.3 | 1315.1 | 1333.5 | 1335.1 | 1360.5 | 1387.6 | 1408.8 |
| 1416.3 | 1439.3 | 1464.5 | 1479.4 | 1488.7 | 1504.0 | 1506.2 | 1510.9 | 1589.2 |
| 1873.3 | 3029.8 | 3041.3 | 3060.6 | 3061.8 | 3066.6 | 3073.7 | 3078.4 | 3090.3 |
| 3101.9 | 3123.4 | 3132.5 | 3142.3 | 3794.9 | 3831.7 |        |        |        |

**TS6**

|        |        |        |        |        |        |        |        |        |
|--------|--------|--------|--------|--------|--------|--------|--------|--------|
| -677.7 | 26.4   | 37.9   | 63.3   | 75.3   | 80.9   | 97.4   | 116.9  | 138.9  |
| 152.1  | 195.2  | 235.4  | 257.0  | 353.5  | 456.7  | 512.1  | 519.9  | 617.8  |
| 649.2  | 651.0  | 733.6  | 764.3  | 816.4  | 899.3  | 902.8  | 921.9  | 992.5  |
| 1039.7 | 1067.6 | 1092.6 | 1096.9 | 1132.5 | 1144.5 | 1180.4 | 1194.0 | 1244.4 |
| 1257.3 | 1279.7 | 1296.1 | 1329.7 | 1336.5 | 1340.1 | 1381.7 | 1406.0 | 1413.4 |
| 1418.7 | 1439.9 | 1463.6 | 1482.1 | 1492.8 | 1498.7 | 1501.2 | 1509.4 | 1638.7 |
| 1873.2 | 3029.5 | 3042.2 | 3052.8 | 3063.8 | 3066.9 | 3075.0 | 3079.9 | 3088.8 |
| 3101.6 | 3116.9 | 3121.6 | 3138.7 | 3801.1 | 3832.4 |        |        |        |

**TS7**

|        |      |      |      |      |      |       |       |       |
|--------|------|------|------|------|------|-------|-------|-------|
| -752.2 | 23.9 | 38.9 | 60.6 | 62.6 | 86.1 | 110.3 | 117.4 | 136.2 |
|--------|------|------|------|------|------|-------|-------|-------|

|        |        |        |        |        |        |        |        |        |
|--------|--------|--------|--------|--------|--------|--------|--------|--------|
| 165.1  | 192.0  | 258.6  | 323.5  | 352.5  | 457.5  | 511.8  | 518.9  | 647.3  |
| 651.1  | 725.6  | 738.9  | 783.9  | 815.5  | 881.8  | 902.9  | 917.0  | 994.6  |
| 1035.6 | 1062.8 | 1084.2 | 1095.3 | 1124.7 | 1143.6 | 1171.4 | 1190.4 | 1227.6 |
| 1258.5 | 1269.8 | 1298.5 | 1312.8 | 1332.9 | 1335.4 | 1347.4 | 1351.5 | 1391.3 |
| 1415.3 | 1439.5 | 1454.6 | 1463.8 | 1479.6 | 1489.6 | 1492.7 | 1498.2 | 1511.5 |
| 1874.1 | 3034.3 | 3035.3 | 3043.4 | 3066.3 | 3067.2 | 3075.7 | 3079.5 | 3090.2 |
| 3098.4 | 3102.8 | 3122.0 | 3159.5 | 3803.1 | 3831.8 |        |        |        |

**TS7'**

|        |        |        |        |        |        |        |        |        |
|--------|--------|--------|--------|--------|--------|--------|--------|--------|
| -706.6 | 25.4   | 35.8   | 39.8   | 64.5   | 76.3   | 87.5   | 91.0   | 138.0  |
| 151.6  | 195.3  | 237.0  | 329.4  | 356.8  | 444.8  | 512.4  | 520.6  | 650.3  |
| 650.8  | 708.5  | 730.2  | 748.6  | 808.9  | 894.6  | 903.9  | 968.9  | 1001.2 |
| 1033.0 | 1064.3 | 1082.3 | 1086.4 | 1112.4 | 1143.2 | 1177.8 | 1215.7 | 1229.2 |
| 1257.3 | 1274.9 | 1295.0 | 1316.8 | 1324.6 | 1335.5 | 1338.4 | 1348.7 | 1385.5 |
| 1410.5 | 1439.6 | 1443.7 | 1463.9 | 1484.4 | 1489.7 | 1497.3 | 1502.4 | 1512.6 |
| 1874.1 | 3037.0 | 3044.9 | 3063.0 | 3066.3 | 3067.2 | 3076.1 | 3083.4 | 3088.4 |
| 3100.1 | 3107.4 | 3122.4 | 3155.4 | 3807.1 | 3831.9 |        |        |        |

**(6) C<sub>4</sub>H<sub>9</sub>C(O)OC<sub>2</sub>H<sub>5</sub>**

**TS1'**

|        |        |        |        |        |        |        |        |        |
|--------|--------|--------|--------|--------|--------|--------|--------|--------|
| -988.2 | 21.6   | 36.5   | 48.6   | 71.2   | 80.9   | 91.9   | 100.8  | 120.1  |
| 176.7  | 188.6  | 249.7  | 290.5  | 334.7  | 344.6  | 381.2  | 499.0  | 587.1  |
| 722.1  | 733.4  | 765.7  | 807.9  | 837.3  | 886.5  | 920.6  | 940.9  | 971.5  |
| 1003.3 | 1054.2 | 1088.7 | 1095.8 | 1137.3 | 1143.9 | 1173.8 | 1197.4 | 1218.8 |
| 1237.0 | 1297.4 | 1302.5 | 1310.8 | 1315.2 | 1331.4 | 1379.9 | 1399.8 | 1412.3 |
| 1416.4 | 1434.4 | 1464.2 | 1484.1 | 1491.1 | 1500.2 | 1505.5 | 1514.0 | 1522.1 |
| 1853.6 | 3047.7 | 3060.4 | 3066.4 | 3074.9 | 3078.0 | 3091.0 | 3099.4 | 3112.9 |
| 3119.7 | 3131.7 | 3137.0 | 3138.4 | 3188.8 | 3805.0 |        |        |        |

**TS1**

|         |        |        |        |        |        |        |        |        |
|---------|--------|--------|--------|--------|--------|--------|--------|--------|
| -1138.2 | 28.0   | 45.7   | 58.6   | 76.5   | 97.0   | 121.3  | 135.3  | 186.2  |
| 204.2   | 247.0  | 289.6  | 300.5  | 333.0  | 377.6  | 388.9  | 498.5  | 586.1  |
| 702.1   | 734.0  | 736.5  | 809.8  | 855.2  | 902.8  | 923.0  | 942.1  | 970.8  |
| 983.1   | 1052.4 | 1085.9 | 1094.7 | 1137.7 | 1145.0 | 1160.3 | 1199.4 | 1217.3 |
| 1238.0  | 1285.4 | 1301.7 | 1317.0 | 1322.4 | 1332.8 | 1381.3 | 1411.1 | 1417.1 |
| 1432.3  | 1459.3 | 1464.4 | 1491.9 | 1500.5 | 1503.4 | 1505.1 | 1512.9 | 1514.6 |
| 1861.1  | 3048.2 | 3060.8 | 3064.0 | 3074.1 | 3078.8 | 3081.7 | 3098.3 | 3113.6 |
| 3119.7  | 3131.6 | 3132.2 | 3139.2 | 3191.6 | 3786.5 |        |        |        |

**TS2**

|        |        |        |        |        |        |        |        |        |
|--------|--------|--------|--------|--------|--------|--------|--------|--------|
| -889.7 | 28.9   | 47.5   | 79.8   | 90.1   | 115.0  | 128.2  | 158.4  | 172.7  |
| 203.6  | 245.6  | 265.0  | 298.4  | 334.8  | 386.5  | 411.3  | 500.6  | 587.6  |
| 646.3  | 728.6  | 735.8  | 809.2  | 866.5  | 909.4  | 935.6  | 942.0  | 954.1  |
| 976.7  | 1055.3 | 1092.7 | 1123.8 | 1138.8 | 1154.2 | 1161.0 | 1165.8 | 1237.5 |
| 1238.2 | 1307.2 | 1316.3 | 1316.9 | 1333.1 | 1381.2 | 1399.1 | 1417.4 | 1423.4 |
| 1438.1 | 1462.5 | 1485.3 | 1492.2 | 1496.2 | 1500.6 | 1504.9 | 1514.4 | 1518.9 |
| 1838.8 | 3048.6 | 3060.8 | 3066.5 | 3071.4 | 3075.0 | 3079.0 | 3099.9 | 3114.2 |
| 3119.9 | 3132.2 | 3139.2 | 3147.1 | 3165.7 | 3762.1 |        |        |        |

**TS3**

|        |        |        |        |        |        |        |        |        |
|--------|--------|--------|--------|--------|--------|--------|--------|--------|
| -943.3 | 27.5   | 63.7   | 71.5   | 73.0   | 88.0   | 98.4   | 142.7  | 173.2  |
| 201.4  | 245.2  | 263.5  | 297.1  | 308.3  | 333.4  | 389.6  | 471.6  | 602.0  |
| 662.2  | 725.6  | 746.4  | 813.2  | 831.7  | 896.0  | 924.2  | 936.0  | 942.2  |
| 987.8  | 1058.7 | 1083.4 | 1104.0 | 1135.4 | 1150.6 | 1166.0 | 1185.0 | 1222.9 |
| 1252.6 | 1293.4 | 1312.1 | 1314.6 | 1329.9 | 1365.3 | 1400.9 | 1409.8 | 1417.7 |
| 1437.9 | 1479.9 | 1493.0 | 1497.6 | 1503.7 | 1504.6 | 1506.1 | 1512.7 | 1529.6 |
| 1853.9 | 3050.0 | 3057.1 | 3061.3 | 3075.1 | 3084.2 | 3092.1 | 3099.1 | 3111.8 |
| 3131.6 | 3132.3 | 3139.9 | 3153.9 | 3160.0 | 3777.7 |        |        |        |

**TS4**

|        |        |        |        |        |        |        |        |        |
|--------|--------|--------|--------|--------|--------|--------|--------|--------|
| -795.0 | 25.3   | 58.3   | 80.7   | 90.2   | 95.9   | 130.8  | 145.8  | 159.7  |
| 207.6  | 248.8  | 265.7  | 294.2  | 339.2  | 401.0  | 441.4  | 494.3  | 597.3  |
| 694.6  | 731.1  | 755.2  | 808.9  | 817.1  | 899.8  | 932.7  | 970.2  | 977.6  |
| 1050.6 | 1082.4 | 1095.2 | 1109.7 | 1138.0 | 1152.8 | 1167.1 | 1185.3 | 1238.5 |
| 1245.4 | 1292.7 | 1313.3 | 1316.3 | 1334.6 | 1380.7 | 1397.9 | 1409.3 | 1418.6 |
| 1432.1 | 1447.8 | 1456.6 | 1486.3 | 1491.9 | 1504.5 | 1504.7 | 1510.5 | 1528.9 |
| 1827.3 | 3036.8 | 3064.0 | 3064.4 | 3077.9 | 3078.9 | 3091.6 | 3096.5 | 3109.9 |
| 3132.9 | 3136.0 | 3145.5 | 3156.3 | 3163.0 | 3745.4 |        |        |        |

**TS5**

|        |        |        |        |        |        |        |        |        |
|--------|--------|--------|--------|--------|--------|--------|--------|--------|
| -527.1 | 22.0   | 40.4   | 62.9   | 78.7   | 83.7   | 94.6   | 102.4  | 127.8  |
| 153.9  | 201.0  | 235.9  | 265.6  | 298.6  | 331.0  | 394.8  | 499.5  | 591.1  |
| 628.1  | 728.2  | 775.4  | 814.8  | 832.5  | 896.4  | 920.6  | 943.8  | 973.8  |
| 1054.4 | 1081.1 | 1094.0 | 1128.3 | 1142.7 | 1157.1 | 1185.4 | 1196.8 | 1224.6 |
| 1235.3 | 1302.9 | 1312.0 | 1320.1 | 1365.3 | 1383.0 | 1400.0 | 1412.6 | 1423.9 |
| 1446.0 | 1468.9 | 1486.0 | 1491.7 | 1496.1 | 1500.3 | 1504.7 | 1529.7 | 1644.3 |
| 1847.4 | 3055.7 | 3059.5 | 3072.9 | 3074.8 | 3075.9 | 3087.4 | 3102.3 | 3120.1 |
| 3125.2 | 3127.6 | 3145.5 | 3153.6 | 3160.2 | 3800.9 |        |        |        |

**TS6**

|        |        |        |        |        |        |        |        |        |
|--------|--------|--------|--------|--------|--------|--------|--------|--------|
| -785.1 | 18.3   | 41.5   | 68.9   | 82.2   | 85.1   | 100.3  | 135.5  | 148.5  |
| 167.6  | 203.1  | 263.9  | 297.2  | 329.4  | 334.8  | 395.5  | 501.0  | 589.5  |
| 725.7  | 730.2  | 793.2  | 809.5  | 816.0  | 892.6  | 911.3  | 943.1  | 972.4  |
| 1049.9 | 1081.2 | 1093.5 | 1112.5 | 1139.4 | 1153.6 | 1179.4 | 1185.2 | 1229.1 |
| 1237.3 | 1297.5 | 1312.2 | 1312.5 | 1329.7 | 1350.9 | 1384.2 | 1401.7 | 1423.4 |
| 1445.2 | 1450.9 | 1465.9 | 1478.1 | 1485.7 | 1491.4 | 1504.4 | 1506.0 | 1529.6 |
| 1848.1 | 3035.7 | 3066.4 | 3073.9 | 3076.3 | 3083.1 | 3088.1 | 3095.2 | 3103.2 |

**TS6'**

|        |        |        |        |        |        |        |        |        |
|--------|--------|--------|--------|--------|--------|--------|--------|--------|
| -718.2 | 25.2   | 28.6   | 39.1   | 51.1   | 79.5   | 95.5   | 98.2   | 120.5  |
| 155.4  | 193.4  | 264.3  | 288.8  | 318.5  | 342.7  | 392.3  | 495.3  | 588.9  |
| 705.9  | 731.6  | 740.0  | 809.4  | 816.3  | 903.3  | 934.8  | 970.5  | 985.4  |
| 1048.8 | 1073.3 | 1083.9 | 1113.1 | 1136.6 | 1152.3 | 1185.2 | 1218.5 | 1233.9 |
| 1243.2 | 1293.8 | 1311.9 | 1313.2 | 1329.2 | 1335.4 | 1378.8 | 1399.1 | 1420.8 |
| 1437.2 | 1444.8 | 1465.1 | 1484.5 | 1491.6 | 1496.4 | 1504.4 | 1507.9 | 1529.8 |
| 1848.9 | 3058.9 | 3069.0 | 3076.2 | 3077.9 | 3088.0 | 3090.5 | 3091.9 | 3104.5 |
| 3125.0 | 3128.3 | 3154.1 | 3157.9 | 3160.5 | 3806.9 |        |        |        |

**(7) C<sub>3</sub>H<sub>7</sub>C(O)OC<sub>3</sub>H<sub>7</sub>****TS1'**

|        |        |        |        |        |        |        |        |        |
|--------|--------|--------|--------|--------|--------|--------|--------|--------|
| -860.6 | 25.7   | 36.7   | 47.6   | 57.5   | 67.4   | 101.1  | 101.9  | 104.5  |
| 187.2  | 193.6  | 244.8  | 286.4  | 326.8  | 348.6  | 370.1  | 500.0  | 588.0  |
| 725.7  | 745.3  | 752.1  | 785.5  | 888.4  | 897.0  | 913.7  | 925.2  | 964.0  |
| 1055.4 | 1069.2 | 1075.8 | 1087.7 | 1129.9 | 1147.6 | 1182.7 | 1221.7 | 1242.1 |
| 1254.1 | 1285.8 | 1307.8 | 1322.8 | 1327.8 | 1339.9 | 1357.8 | 1411.9 | 1419.7 |
| 1426.2 | 1442.6 | 1464.9 | 1477.4 | 1496.1 | 1501.8 | 1506.2 | 1512.9 | 1525.5 |
| 1851.7 | 3059.2 | 3067.9 | 3072.9 | 3080.3 | 3084.6 | 3093.8 | 3099.1 | 3111.6 |
| 3115.8 | 3132.8 | 3136.7 | 3140.8 | 3163.6 | 3805.7 |        |        |        |

**TS1**

|        |        |        |        |        |        |        |        |        |
|--------|--------|--------|--------|--------|--------|--------|--------|--------|
| -811.1 | 29.1   | 31.5   | 51.5   | 78.1   | 88.2   | 99.5   | 112.9  | 135.9  |
| 194.8  | 198.7  | 245.8  | 300.9  | 322.5  | 342.0  | 369.6  | 512.4  | 588.5  |
| 727.1  | 736.5  | 752.3  | 802.7  | 870.2  | 889.4  | 913.8  | 934.3  | 968.6  |
| 1052.7 | 1067.4 | 1070.4 | 1117.1 | 1130.1 | 1147.4 | 1176.5 | 1214.6 | 1234.6 |
| 1254.2 | 1275.0 | 1312.0 | 1327.5 | 1335.0 | 1341.3 | 1349.6 | 1413.3 | 1420.0 |
| 1434.2 | 1446.9 | 1464.8 | 1475.4 | 1491.1 | 1496.0 | 1506.1 | 1512.8 | 1529.7 |
| 1850.3 | 3058.9 | 3060.5 | 3067.8 | 3075.9 | 3084.4 | 3095.5 | 3099.1 | 3112.0 |
| 3115.6 | 3134.4 | 3136.5 | 3140.4 | 3168.7 | 3801.4 |        |        |        |

**TS2**

|        |        |        |        |        |        |        |        |        |
|--------|--------|--------|--------|--------|--------|--------|--------|--------|
| -821.1 | 31.2   | 39.9   | 58.8   | 79.4   | 98.2   | 128.5  | 135.0  | 191.8  |
| 198.9  | 226.3  | 244.6  | 293.8  | 316.3  | 344.5  | 368.6  | 505.9  | 586.3  |
| 650.2  | 727.6  | 751.9  | 757.9  | 889.5  | 906.7  | 919.5  | 937.5  | 970.3  |
| 1017.9 | 1058.1 | 1070.6 | 1108.2 | 1130.0 | 1146.6 | 1168.9 | 1176.4 | 1223.1 |
| 1255.0 | 1287.3 | 1321.6 | 1329.0 | 1338.0 | 1355.3 | 1411.7 | 1414.2 | 1419.9 |
| 1436.0 | 1464.2 | 1495.2 | 1495.8 | 1498.6 | 1506.4 | 1510.0 | 1512.7 | 1578.1 |
| 1860.3 | 3056.4 | 3059.8 | 3064.3 | 3073.9 | 3085.0 | 3097.9 | 3105.8 | 3116.1 |
| 3122.2 | 3129.8 | 3137.3 | 3142.2 | 3156.0 | 3782.8 |        |        |        |

**TS3**

|        |        |        |        |        |        |        |        |        |
|--------|--------|--------|--------|--------|--------|--------|--------|--------|
| -835.2 | 36.1   | 48.6   | 65.9   | 89.3   | 101.9  | 116.2  | 137.4  | 197.7  |
| 222.8  | 244.7  | 246.1  | 299.5  | 337.7  | 371.2  | 406.5  | 513.4  | 588.9  |
| 654.9  | 727.9  | 753.2  | 787.0  | 888.6  | 905.3  | 921.4  | 951.1  | 971.5  |
| 990.2  | 1059.2 | 1070.8 | 1111.5 | 1131.8 | 1154.0 | 1166.0 | 1179.0 | 1246.3 |
| 1255.4 | 1274.5 | 1318.0 | 1328.4 | 1340.3 | 1353.1 | 1413.5 | 1420.2 | 1421.7 |
| 1437.6 | 1462.8 | 1491.0 | 1496.6 | 1505.5 | 1506.2 | 1507.2 | 1513.4 | 1513.6 |
| 1838.6 | 3060.2 | 3062.7 | 3067.9 | 3068.2 | 3084.7 | 3097.2 | 3099.9 | 3114.2 |
| 3116.8 | 3137.4 | 3140.5 | 3142.4 | 3151.4 | 3761.0 |        |        |        |

**TS4**

|        |        |        |        |        |        |        |        |        |
|--------|--------|--------|--------|--------|--------|--------|--------|--------|
| -946.5 | 29.6   | 56.1   | 70.0   | 82.2   | 85.5   | 110.9  | 129.6  | 184.7  |
| 204.2  | 234.4  | 251.7  | 293.5  | 325.3  | 338.8  | 362.1  | 504.5  | 598.7  |
| 654.5  | 726.2  | 764.4  | 773.9  | 892.6  | 896.7  | 901.7  | 934.6  | 967.3  |
| 980.6  | 1049.7 | 1077.1 | 1085.3 | 1122.5 | 1163.1 | 1166.5 | 1190.2 | 1229.1 |
| 1272.3 | 1282.9 | 1314.7 | 1323.1 | 1325.3 | 1340.3 | 1394.0 | 1419.4 | 1420.4 |
| 1436.3 | 1483.5 | 1498.6 | 1503.8 | 1506.6 | 1508.0 | 1510.5 | 1511.9 | 1527.1 |

|        |        |        |        |        |        |        |        |        |
|--------|--------|--------|--------|--------|--------|--------|--------|--------|
| 1853.7 | 3062.9 | 3064.9 | 3067.3 | 3069.9 | 3081.4 | 3098.2 | 3104.6 | 3113.3 |
| 3127.4 | 3136.6 | 3140.8 | 3146.1 | 3148.2 | 3776.9 |        |        |        |

**TS5**

|        |        |        |        |        |        |        |        |        |
|--------|--------|--------|--------|--------|--------|--------|--------|--------|
| -834.2 | 24.1   | 59.6   | 73.3   | 87.5   | 102.1  | 127.8  | 158.8  | 194.7  |
| 209.7  | 232.8  | 235.4  | 299.0  | 338.3  | 372.4  | 447.1  | 507.6  | 594.2  |
| 682.5  | 735.6  | 763.0  | 767.5  | 897.0  | 906.1  | 918.9  | 946.7  | 975.8  |
| 1047.6 | 1061.8 | 1077.5 | 1094.5 | 1139.8 | 1148.8 | 1164.5 | 1190.2 | 1249.2 |
| 1256.9 | 1282.1 | 1313.3 | 1325.8 | 1335.5 | 1355.1 | 1407.2 | 1413.6 | 1419.7 |
| 1439.3 | 1451.7 | 1456.2 | 1495.3 | 1499.0 | 1502.4 | 1506.8 | 1511.7 | 1526.5 |
| 1827.4 | 3052.9 | 3064.1 | 3064.4 | 3073.7 | 3082.2 | 3099.7 | 3107.6 | 3111.5 |
| 3124.0 | 3126.5 | 3141.7 | 3147.6 | 3151.6 | 3747.6 |        |        |        |

**TS6**

|        |        |        |        |        |        |        |        |        |
|--------|--------|--------|--------|--------|--------|--------|--------|--------|
| -797.9 | 23.1   | 38.4   | 66.5   | 77.1   | 84.8   | 104.2  | 115.8  | 136.9  |
| 194.1  | 200.6  | 236.0  | 300.6  | 325.7  | 347.5  | 379.7  | 511.2  | 593.4  |
| 705.9  | 729.0  | 763.3  | 801.8  | 854.8  | 897.7  | 909.2  | 933.5  | 974.2  |
| 1046.4 | 1051.2 | 1080.0 | 1094.2 | 1146.5 | 1164.1 | 1189.9 | 1197.3 | 1238.8 |
| 1281.4 | 1310.8 | 1324.6 | 1330.1 | 1338.4 | 1350.7 | 1362.5 | 1417.1 | 1418.7 |
| 1443.0 | 1447.7 | 1468.6 | 1485.4 | 1492.7 | 1498.4 | 1507.1 | 1511.5 | 1526.9 |
| 1845.8 | 3063.4 | 3064.8 | 3071.3 | 3075.8 | 3079.9 | 3090.9 | 3104.9 | 3105.1 |
| 3123.0 | 3123.4 | 3139.7 | 3145.9 | 3163.5 | 3804.0 |        |        |        |

**TS6'**

|        |        |        |        |        |        |        |        |        |
|--------|--------|--------|--------|--------|--------|--------|--------|--------|
| -864.6 | 19.6   | 49.1   | 56.8   | 71.8   | 73.7   | 86.7   | 100.8  | 103.9  |
| 191.8  | 195.4  | 233.8  | 290.4  | 331.5  | 351.7  | 360.0  | 510.1  | 590.5  |
| 693.8  | 730.7  | 756.5  | 763.6  | 887.2  | 898.3  | 916.2  | 948.3  | 975.3  |
| 1033.5 | 1065.7 | 1077.2 | 1093.2 | 1126.1 | 1163.6 | 1189.8 | 1230.6 | 1240.8 |
| 1278.5 | 1281.4 | 1318.8 | 1324.9 | 1329.9 | 1336.1 | 1357.6 | 1411.2 | 1419.1 |
| 1427.4 | 1444.3 | 1465.2 | 1477.1 | 1498.4 | 1503.1 | 1506.6 | 1511.5 | 1526.5 |
| 1848.8 | 3063.9 | 3071.3 | 3072.0 | 3079.7 | 3080.6 | 3091.8 | 3105.2 | 3105.7 |
| 3124.3 | 3125.6 | 3140.3 | 3146.6 | 3162.0 | 3804.1 |        |        |        |

**(8) C<sub>2</sub>H<sub>5</sub>C(O)OC<sub>4</sub>H<sub>9</sub>**

**TS1'**

|        |        |        |        |        |        |        |        |        |
|--------|--------|--------|--------|--------|--------|--------|--------|--------|
| -804.8 | 27.8   | 36.1   | 43.4   | 59.0   | 69.0   | 94.4   | 100.3  | 128.0  |
| 175.4  | 200.9  | 223.9  | 266.8  | 318.1  | 337.5  | 425.1  | 512.7  | 584.4  |
| 679.5  | 735.5  | 764.7  | 815.2  | 825.9  | 899.7  | 930.4  | 956.6  | 1011.6 |
| 1034.0 | 1066.4 | 1074.6 | 1114.8 | 1120.7 | 1126.5 | 1188.3 | 1235.8 | 1249.9 |
| 1270.9 | 1284.8 | 1288.3 | 1323.3 | 1327.9 | 1342.0 | 1388.3 | 1398.2 | 1423.8 |
| 1434.8 | 1443.8 | 1468.2 | 1477.1 | 1496.7 | 1498.6 | 1505.5 | 1507.0 | 1526.6 |
| 1852.3 | 3055.7 | 3066.6 | 3078.2 | 3081.0 | 3082.3 | 3090.2 | 3092.2 | 3108.2 |
| 3115.8 | 3131.0 | 3157.5 | 3159.4 | 3160.3 | 3805.5 |        |        |        |

**TS1**

|        |        |        |        |        |        |        |        |        |
|--------|--------|--------|--------|--------|--------|--------|--------|--------|
| -770.4 | 26.7   | 35.1   | 51.0   | 72.3   | 91.7   | 95.3   | 112.0  | 142.6  |
| 177.9  | 211.2  | 225.7  | 282.1  | 316.0  | 327.0  | 440.9  | 514.4  | 584.9  |
| 679.7  | 730.1  | 782.7  | 814.7  | 827.1  | 888.1  | 926.6  | 958.7  | 1018.4 |
| 1035.2 | 1068.5 | 1094.0 | 1114.9 | 1124.8 | 1128.9 | 1176.9 | 1210.3 | 1246.5 |

|        |        |        |        |        |        |        |        |        |
|--------|--------|--------|--------|--------|--------|--------|--------|--------|
| 1259.2 | 1284.1 | 1295.6 | 1317.8 | 1324.9 | 1345.6 | 1388.9 | 1401.2 | 1423.5 |
| 1444.6 | 1451.2 | 1468.1 | 1481.2 | 1488.1 | 1498.7 | 1506.0 | 1507.0 | 1526.9 |
| 1851.6 | 3039.3 | 3061.8 | 3076.5 | 3080.9 | 3082.0 | 3085.8 | 3096.2 | 3108.2 |
| 3115.7 | 3130.5 | 3157.2 | 3160.1 | 3163.1 | 3803.4 |        |        |        |

**TS2**

|        |        |        |        |        |        |        |        |        |
|--------|--------|--------|--------|--------|--------|--------|--------|--------|
| -554.6 | 30.4   | 34.0   | 52.7   | 69.2   | 87.3   | 108.4  | 114.9  | 127.7  |
| 168.8  | 209.3  | 222.6  | 242.5  | 279.8  | 317.5  | 435.4  | 515.5  | 584.7  |
| 636.1  | 680.0  | 777.5  | 816.0  | 850.4  | 902.9  | 939.4  | 950.4  | 1021.3 |
| 1038.5 | 1080.9 | 1089.7 | 1114.9 | 1126.0 | 1157.7 | 1180.6 | 1224.9 | 1245.9 |
| 1262.9 | 1284.5 | 1290.1 | 1320.0 | 1349.8 | 1384.0 | 1398.4 | 1413.1 | 1423.8 |
| 1443.7 | 1468.0 | 1488.0 | 1495.9 | 1498.8 | 1500.3 | 1507.0 | 1529.2 | 1556.9 |
| 1850.7 | 3053.4 | 3057.5 | 3075.5 | 3078.3 | 3080.9 | 3082.2 | 3103.8 | 3116.0 |
| 3126.1 | 3131.9 | 3149.9 | 3157.2 | 3160.2 | 3795.7 |        |        |        |

**TS3**

|        |        |        |        |        |        |        |        |        |
|--------|--------|--------|--------|--------|--------|--------|--------|--------|
| -775.9 | 32.7   | 45.7   | 58.6   | 77.5   | 82.9   | 108.7  | 148.2  | 172.7  |
| 209.3  | 224.5  | 250.7  | 278.7  | 305.7  | 312.1  | 437.2  | 513.0  | 582.2  |
| 658.7  | 685.4  | 736.2  | 810.0  | 817.9  | 899.5  | 942.0  | 976.7  | 1016.8 |
| 1035.3 | 1047.5 | 1078.2 | 1114.5 | 1119.7 | 1126.6 | 1158.8 | 1187.9 | 1236.2 |
| 1265.9 | 1285.8 | 1297.6 | 1308.8 | 1355.3 | 1383.3 | 1397.0 | 1418.9 | 1423.8 |
| 1435.2 | 1467.0 | 1485.7 | 1499.4 | 1505.5 | 1506.4 | 1509.1 | 1512.2 | 1572.0 |
| 1860.9 | 3040.7 | 3064.6 | 3075.7 | 3078.1 | 3082.8 | 3083.9 | 3099.5 | 3113.9 |
| 3126.5 | 3136.9 | 3145.6 | 3159.3 | 3161.8 | 3781.6 |        |        |        |

**TS4**

|        |        |        |        |        |        |        |        |        |
|--------|--------|--------|--------|--------|--------|--------|--------|--------|
| -831.2 | 38.4   | 58.1   | 64.4   | 71.5   | 83.6   | 138.5  | 153.0  | 199.5  |
| 215.2  | 233.2  | 252.3  | 284.2  | 319.1  | 406.2  | 425.2  | 515.6  | 584.7  |
| 660.8  | 686.5  | 750.8  | 815.9  | 848.3  | 899.3  | 938.7  | 965.1  | 984.7  |
| 1025.8 | 1043.3 | 1080.3 | 1114.0 | 1116.6 | 1145.5 | 1169.0 | 1176.8 | 1251.5 |
| 1258.9 | 1285.7 | 1293.7 | 1330.8 | 1333.0 | 1389.7 | 1401.4 | 1418.2 | 1424.6 |
| 1436.6 | 1465.8 | 1488.4 | 1498.8 | 1500.0 | 1504.3 | 1506.3 | 1509.9 | 1514.1 |
| 1839.6 | 3048.8 | 3058.9 | 3062.3 | 3081.5 | 3083.3 | 3088.3 | 3099.3 | 3112.9 |
| 3116.5 | 3132.4 | 3141.4 | 3159.8 | 3161.3 | 3761.0 |        |        |        |

**TS5**

|         |        |        |        |        |        |        |        |        |
|---------|--------|--------|--------|--------|--------|--------|--------|--------|
| -1003.1 | 28.1   | 52.3   | 65.3   | 74.8   | 118.6  | 127.5  | 138.3  | 168.9  |
| 207.6   | 222.5  | 249.1  | 276.1  | 304.7  | 326.8  | 437.5  | 503.6  | 595.7  |
| 641.5   | 677.6  | 744.5  | 810.2  | 846.2  | 892.0  | 924.6  | 952.6  | 954.8  |
| 1022.7  | 1060.1 | 1077.8 | 1094.5 | 1098.6 | 1146.1 | 1160.5 | 1192.1 | 1238.9 |
| 1261.4  | 1295.3 | 1304.2 | 1322.4 | 1331.2 | 1360.7 | 1391.6 | 1415.4 | 1418.3 |
| 1438.9  | 1486.7 | 1490.5 | 1494.2 | 1499.6 | 1505.7 | 1512.2 | 1523.5 | 1529.7 |
| 1854.4  | 3051.8 | 3059.4 | 3063.0 | 3073.9 | 3081.6 | 3083.0 | 3102.8 | 3117.0 |
| 3130.8  | 3135.0 | 3141.4 | 3145.5 | 3166.8 | 3777.9 |        |        |        |

**TS6**

|         |        |        |        |        |        |        |        |        |
|---------|--------|--------|--------|--------|--------|--------|--------|--------|
| -1170.5 | 23.4   | 55.9   | 62.5   | 78.6   | 118.5  | 124.7  | 152.0  | 184.2  |
| 213.3   | 250.8  | 286.2  | 312.7  | 354.5  | 437.8  | 450.6  | 511.3  | 584.5  |
| 665.4   | 744.0  | 766.6  | 811.7  | 860.0  | 913.1  | 939.4  | 953.3  | 960.0  |
| 1021.1  | 1044.7 | 1074.6 | 1095.9 | 1102.0 | 1142.1 | 1160.6 | 1192.1 | 1249.4 |

|        |        |        |        |        |        |        |        |        |
|--------|--------|--------|--------|--------|--------|--------|--------|--------|
| 1261.4 | 1270.7 | 1295.4 | 1321.9 | 1323.5 | 1330.4 | 1388.6 | 1408.2 | 1418.3 |
| 1445.3 | 1448.5 | 1456.9 | 1466.5 | 1494.6 | 1500.1 | 1506.1 | 1512.4 | 1525.8 |
| 1828.3 | 3052.3 | 3061.2 | 3065.1 | 3074.4 | 3081.5 | 3083.2 | 3105.4 | 3108.4 |
| 3117.9 | 3130.7 | 3135.3 | 3141.1 | 3189.0 | 3754.1 |        |        |        |

**TS6'**

|        |        |        |        |        |        |        |        |        |
|--------|--------|--------|--------|--------|--------|--------|--------|--------|
| -825.2 | 32.3   | 34.5   | 43.5   | 60.8   | 76.3   | 90.8   | 102.6  | 125.6  |
| 182.0  | 197.2  | 252.6  | 278.2  | 282.4  | 336.9  | 437.5  | 507.2  | 585.1  |
| 669.7  | 743.7  | 753.4  | 810.1  | 822.7  | 909.2  | 952.7  | 953.3  | 988.6  |
| 1024.7 | 1064.6 | 1091.6 | 1100.6 | 1114.6 | 1159.5 | 1192.1 | 1211.9 | 1244.9 |
| 1261.0 | 1279.3 | 1294.9 | 1316.5 | 1322.5 | 1329.7 | 1384.2 | 1393.9 | 1411.2 |
| 1417.8 | 1444.9 | 1467.4 | 1480.9 | 1494.6 | 1500.3 | 1506.2 | 1512.7 | 1526.4 |
| 1845.1 | 3051.9 | 3060.7 | 3064.5 | 3078.6 | 3082.5 | 3088.7 | 3103.9 | 3117.5 |
| 3127.3 | 3128.5 | 3133.8 | 3140.2 | 3187.3 | 3807.1 |        |        |        |

**(9) CH<sub>3</sub>C(O)OC<sub>5</sub>H<sub>11</sub>**

**TS1'**

|        |        |        |        |        |        |        |        |        |
|--------|--------|--------|--------|--------|--------|--------|--------|--------|
| -726.8 | 25.6   | 36.5   | 47.6   | 51.3   | 62.0   | 75.3   | 89.9   | 121.6  |
| 134.8  | 199.1  | 203.1  | 249.7  | 328.6  | 358.8  | 450.3  | 493.5  | 612.8  |
| 659.8  | 715.3  | 738.7  | 775.2  | 859.9  | 937.6  | 967.5  | 988.6  | 1002.8 |
| 1040.8 | 1071.4 | 1072.7 | 1084.8 | 1109.7 | 1125.9 | 1191.9 | 1224.3 | 1246.5 |
| 1269.8 | 1301.1 | 1304.3 | 1320.1 | 1329.3 | 1335.8 | 1357.8 | 1399.0 | 1406.9 |
| 1435.9 | 1444.1 | 1477.7 | 1481.7 | 1482.7 | 1495.4 | 1497.0 | 1509.9 | 1526.4 |
| 1856.3 | 3042.7 | 3063.3 | 3067.2 | 3075.6 | 3078.1 | 3089.1 | 3089.9 | 3101.5 |
| 3110.7 | 3130.4 | 3156.5 | 3161.3 | 3202.3 | 3806.9 |        |        |        |

**TS1**

|        |        |        |        |        |        |        |        |        |
|--------|--------|--------|--------|--------|--------|--------|--------|--------|
| -753.9 | 26.6   | 37.1   | 56.3   | 61.8   | 85.7   | 90.4   | 98.7   | 119.8  |
| 154.4  | 199.6  | 205.5  | 266.1  | 324.0  | 356.5  | 457.5  | 497.6  | 613.2  |
| 660.0  | 720.8  | 757.7  | 797.5  | 864.2  | 899.7  | 945.8  | 984.6  | 998.5  |
| 1044.0 | 1072.6 | 1078.9 | 1090.1 | 1111.9 | 1135.4 | 1179.4 | 1209.6 | 1252.6 |
| 1279.1 | 1296.9 | 1304.0 | 1324.6 | 1329.1 | 1346.0 | 1359.9 | 1403.0 | 1411.9 |
| 1444.4 | 1451.1 | 1477.4 | 1480.6 | 1481.5 | 1490.1 | 1496.7 | 1508.3 | 1526.4 |
| 1856.0 | 3036.8 | 3042.1 | 3063.1 | 3077.2 | 3079.4 | 3088.6 | 3089.8 | 3097.3 |
| 3107.1 | 3130.0 | 3160.7 | 3161.1 | 3202.1 | 3804.0 |        |        |        |

**TS2**

|        |        |        |        |        |        |        |        |        |
|--------|--------|--------|--------|--------|--------|--------|--------|--------|
| -527.6 | 28.2   | 39.3   | 61.9   | 71.4   | 84.9   | 94.5   | 98.8   | 117.4  |
| 136.7  | 198.7  | 204.6  | 236.9  | 264.3  | 353.5  | 457.4  | 494.6  | 613.3  |
| 628.1  | 660.1  | 754.1  | 816.4  | 874.9  | 913.6  | 947.6  | 982.3  | 999.0  |
| 1055.2 | 1073.1 | 1082.9 | 1090.6 | 1111.7 | 1159.6 | 1186.0 | 1228.2 | 1246.6 |
| 1267.8 | 1303.1 | 1316.4 | 1322.4 | 1344.8 | 1351.2 | 1399.9 | 1408.6 | 1412.1 |
| 1444.2 | 1478.0 | 1482.5 | 1483.1 | 1495.1 | 1500.2 | 1505.5 | 1526.2 | 1597.8 |
| 1856.7 | 3032.0 | 3055.8 | 3061.7 | 3070.7 | 3077.7 | 3086.5 | 3089.8 | 3107.0 |
| 3124.5 | 3130.7 | 3147.9 | 3161.2 | 3202.3 | 3798.5 |        |        |        |

**TS3**

|        |       |       |       |       |       |       |       |       |
|--------|-------|-------|-------|-------|-------|-------|-------|-------|
| -533.1 | 29.3  | 41.1  | 57.1  | 58.4  | 70.3  | 80.5  | 91.7  | 115.6 |
| 138.4  | 197.2 | 206.4 | 251.4 | 264.8 | 357.6 | 456.2 | 498.1 | 613.1 |

|        |        |        |        |        |        |        |        |        |
|--------|--------|--------|--------|--------|--------|--------|--------|--------|
| 632.5  | 660.4  | 768.7  | 785.5  | 881.8  | 917.1  | 948.4  | 985.7  | 999.1  |
| 1052.3 | 1072.9 | 1081.6 | 1090.9 | 1116.1 | 1161.7 | 1180.7 | 1218.4 | 1250.3 |
| 1276.7 | 1300.0 | 1304.7 | 1326.7 | 1337.1 | 1375.0 | 1398.6 | 1406.5 | 1415.7 |
| 1442.6 | 1477.3 | 1481.8 | 1482.9 | 1493.3 | 1504.4 | 1511.1 | 1528.6 | 1565.2 |
| 1856.4 | 3043.2 | 3055.6 | 3060.6 | 3063.8 | 3077.4 | 3089.8 | 3090.6 | 3104.8 |
| 3131.8 | 3132.6 | 3142.7 | 3161.3 | 3202.2 | 3795.5 |        |        |        |

**TS4**

|        |        |        |        |        |        |        |        |        |
|--------|--------|--------|--------|--------|--------|--------|--------|--------|
| -770.7 | 41.6   | 44.0   | 63.9   | 70.6   | 74.2   | 84.2   | 133.6  | 158.8  |
| 193.6  | 207.4  | 244.6  | 263.3  | 302.7  | 357.8  | 448.8  | 485.2  | 610.3  |
| 652.2  | 682.8  | 731.5  | 765.0  | 869.4  | 907.6  | 942.6  | 995.7  | 1001.5 |
| 1037.4 | 1065.0 | 1072.4 | 1082.0 | 1106.4 | 1119.8 | 1160.7 | 1188.7 | 1250.5 |
| 1277.4 | 1292.9 | 1297.0 | 1332.3 | 1348.9 | 1358.4 | 1401.7 | 1409.3 | 1417.4 |
| 1433.5 | 1477.4 | 1481.2 | 1482.7 | 1497.4 | 1505.4 | 1510.6 | 1512.2 | 1572.6 |
| 1866.3 | 3027.2 | 3056.8 | 3060.3 | 3072.0 | 3076.6 | 3088.2 | 3094.6 | 3101.6 |
| 3127.4 | 3130.3 | 3139.5 | 3160.0 | 3202.8 | 3782.8 |        |        |        |

**TS5**

|        |        |        |        |        |        |        |        |        |
|--------|--------|--------|--------|--------|--------|--------|--------|--------|
| -836.1 | 41.5   | 51.3   | 61.0   | 73.1   | 79.1   | 119.8  | 143.0  | 160.2  |
| 206.2  | 224.2  | 246.9  | 267.5  | 348.5  | 402.0  | 449.2  | 497.5  | 613.2  |
| 649.6  | 678.0  | 737.6  | 793.1  | 888.0  | 909.7  | 947.2  | 979.0  | 993.2  |
| 1008.1 | 1048.6 | 1074.1 | 1088.2 | 1095.3 | 1151.6 | 1174.0 | 1181.2 | 1237.1 |
| 1270.2 | 1307.8 | 1310.9 | 1327.0 | 1339.9 | 1357.0 | 1403.6 | 1413.3 | 1416.7 |
| 1434.2 | 1475.8 | 1480.7 | 1487.2 | 1492.8 | 1500.8 | 1503.3 | 1505.0 | 1515.0 |
| 1845.4 | 3042.6 | 3049.9 | 3055.3 | 3060.4 | 3075.1 | 3090.6 | 3090.8 | 3100.5 |
| 3114.2 | 3130.8 | 3138.0 | 3162.2 | 3204.8 | 3761.4 |        |        |        |

**TS6**

|         |        |        |        |        |        |        |        |        |
|---------|--------|--------|--------|--------|--------|--------|--------|--------|
| -1353.6 | 35.0   | 42.2   | 62.8   | 71.3   | 100.0  | 119.5  | 135.0  | 196.8  |
| 207.5   | 246.5  | 258.1  | 291.6  | 345.3  | 352.8  | 441.3  | 488.8  | 602.6  |
| 654.0   | 737.1  | 772.1  | 779.5  | 861.4  | 882.7  | 909.8  | 948.9  | 989.3  |
| 1031.9  | 1049.2 | 1065.8 | 1089.2 | 1096.6 | 1119.5 | 1161.1 | 1193.4 | 1246.6 |
| 1254.0  | 1271.9 | 1304.8 | 1308.2 | 1326.6 | 1339.2 | 1354.1 | 1409.6 | 1417.2 |
| 1436.2  | 1444.5 | 1481.8 | 1491.7 | 1494.8 | 1504.5 | 1505.4 | 1514.2 | 1526.2 |
| 1856.6  | 3039.8 | 3053.4 | 3059.9 | 3061.2 | 3070.1 | 3082.7 | 3090.9 | 3104.9 |
| 3130.2  | 3131.3 | 3134.6 | 3138.8 | 3220.9 | 3780.4 |        |        |        |

**TS6'**

|         |        |        |        |        |        |        |        |        |
|---------|--------|--------|--------|--------|--------|--------|--------|--------|
| -1502.4 | 21.2   | 49.1   | 53.2   | 67.9   | 112.2  | 127.9  | 143.7  | 202.0  |
| 206.8   | 249.5  | 261.5  | 296.5  | 343.8  | 416.4  | 440.6  | 486.2  | 610.3  |
| 647.2   | 735.7  | 759.0  | 772.1  | 860.4  | 896.6  | 911.7  | 971.1  | 987.6  |
| 1029.8  | 1049.0 | 1054.4 | 1088.8 | 1091.6 | 1118.0 | 1161.2 | 1192.8 | 1234.6 |
| 1246.1  | 1271.4 | 1307.2 | 1325.8 | 1332.0 | 1338.5 | 1354.0 | 1408.7 | 1417.1 |
| 1432.9  | 1455.9 | 1491.1 | 1494.5 | 1495.7 | 1504.3 | 1506.1 | 1513.7 | 1524.7 |
| 1821.7  | 3038.9 | 3053.9 | 3060.2 | 3065.4 | 3069.2 | 3082.7 | 3091.7 | 3107.6 |
| 3127.8  | 3130.0 | 3135.1 | 3138.5 | 3212.9 | 3750.3 |        |        |        |

**(10) HC(O)OC<sub>6</sub>H<sub>13</sub>**

**TS1'**

|        |        |        |        |        |        |        |        |        |
|--------|--------|--------|--------|--------|--------|--------|--------|--------|
| -785.2 | 32.5   | 36.0   | 40.3   | 66.8   | 84.9   | 89.0   | 96.3   | 145.6  |
| 148.8  | 165.9  | 270.3  | 294.7  | 339.6  | 342.0  | 444.0  | 474.6  | 730.1  |
| 742.2  | 767.7  | 809.8  | 817.5  | 901.9  | 915.1  | 991.0  | 1009.8 | 1031.1 |
| 1057.0 | 1062.5 | 1084.5 | 1087.7 | 1130.2 | 1191.8 | 1227.1 | 1244.9 | 1259.3 |
| 1274.1 | 1298.6 | 1310.0 | 1320.9 | 1335.7 | 1338.2 | 1351.4 | 1386.0 | 1408.9 |
| 1410.3 | 1437.2 | 1443.7 | 1478.3 | 1491.9 | 1492.5 | 1501.9 | 1511.0 | 1524.4 |
| 1849.1 | 3039.6 | 3045.9 | 3056.8 | 3065.7 | 3069.3 | 3080.2 | 3084.3 | 3088.8 |
| 3093.4 | 3102.2 | 3109.0 | 3132.5 | 3156.6 | 3805.8 |        |        |        |

**TS1**

|        |        |        |        |        |        |        |        |        |
|--------|--------|--------|--------|--------|--------|--------|--------|--------|
| -748.4 | 23.6   | 41.0   | 57.4   | 61.0   | 74.5   | 88.2   | 109.1  | 144.4  |
| 160.0  | 178.1  | 264.8  | 320.2  | 323.5  | 342.1  | 447.0  | 484.3  | 720.4  |
| 744.0  | 778.3  | 809.6  | 822.7  | 885.0  | 918.9  | 991.0  | 1004.9 | 1042.1 |
| 1062.7 | 1071.7 | 1086.4 | 1096.2 | 1139.2 | 1179.5 | 1204.5 | 1242.4 | 1260.5 |
| 1263.6 | 1283.5 | 1312.6 | 1325.3 | 1333.9 | 1339.8 | 1346.4 | 1386.8 | 1409.8 |
| 1415.2 | 1437.4 | 1453.4 | 1480.2 | 1491.9 | 1493.1 | 1499.0 | 1510.6 | 1524.3 |
| 1848.7 | 3035.4 | 3037.8 | 3045.1 | 3065.0 | 3071.1 | 3080.2 | 3081.1 | 3091.2 |
| 3092.6 | 3100.7 | 3108.3 | 3132.4 | 3160.1 | 3804.3 |        |        |        |

**TS2**

|        |        |        |        |        |        |        |        |        |
|--------|--------|--------|--------|--------|--------|--------|--------|--------|
| -689.2 | 28.5   | 41.8   | 60.5   | 76.2   | 76.8   | 93.0   | 115.7  | 143.0  |
| 148.7  | 177.2  | 236.8  | 268.1  | 318.3  | 341.8  | 446.3  | 483.5  | 622.4  |
| 733.8  | 758.7  | 809.8  | 811.8  | 907.8  | 918.5  | 989.7  | 1001.2 | 1047.4 |
| 1062.5 | 1077.4 | 1096.2 | 1101.5 | 1151.9 | 1175.4 | 1220.5 | 1252.8 | 1261.1 |
| 1262.5 | 1294.5 | 1319.6 | 1326.3 | 1339.6 | 1375.5 | 1401.0 | 1410.0 | 1412.8 |
| 1418.8 | 1437.9 | 1481.2 | 1495.8 | 1499.1 | 1501.3 | 1507.2 | 1524.3 | 1626.3 |
| 1849.0 | 3030.2 | 3045.9 | 3053.1 | 3063.5 | 3067.7 | 3080.9 | 3082.5 | 3091.4 |
| 3091.6 | 3108.1 | 3117.9 | 3133.5 | 3137.7 | 3800.9 |        |        |        |

**TS3**

|        |        |        |        |        |        |        |        |        |
|--------|--------|--------|--------|--------|--------|--------|--------|--------|
| -515.3 | 29.1   | 44.0   | 52.6   | 67.7   | 75.0   | 81.4   | 93.5   | 135.4  |
| 149.9  | 175.0  | 250.4  | 265.3  | 320.1  | 342.1  | 449.7  | 481.1  | 627.1  |
| 752.0  | 772.1  | 810.0  | 826.5  | 909.1  | 919.2  | 992.5  | 1007.8 | 1047.0 |
| 1062.3 | 1074.3 | 1092.8 | 1100.6 | 1161.2 | 1187.5 | 1209.1 | 1240.5 | 1260.5 |
| 1266.3 | 1295.1 | 1313.4 | 1326.6 | 1332.9 | 1366.1 | 1384.6 | 1407.9 | 1409.9 |
| 1414.3 | 1438.6 | 1480.9 | 1490.1 | 1504.1 | 1506.1 | 1510.6 | 1524.5 | 1601.3 |
| 1848.5 | 3032.9 | 3043.8 | 3059.3 | 3061.9 | 3065.3 | 3078.1 | 3081.2 | 3092.5 |
| 3092.6 | 3109.8 | 3130.6 | 3133.2 | 3141.3 | 3797.7 |        |        |        |

**TS4**

|        |        |        |        |        |        |        |        |        |
|--------|--------|--------|--------|--------|--------|--------|--------|--------|
| -538.3 | 30.8   | 53.5   | 56.6   | 60.0   | 71.2   | 87.8   | 113.2  | 143.1  |
| 155.0  | 177.1  | 244.7  | 266.7  | 317.8  | 342.2  | 443.1  | 485.5  | 636.2  |
| 741.6  | 784.9  | 810.4  | 824.6  | 911.8  | 913.0  | 992.7  | 1004.4 | 1047.2 |
| 1062.4 | 1081.3 | 1089.8 | 1094.1 | 1160.2 | 1181.3 | 1203.2 | 1240.4 | 1260.2 |
| 1272.1 | 1284.2 | 1315.1 | 1322.7 | 1335.6 | 1368.8 | 1386.2 | 1409.1 | 1410.4 |
| 1416.4 | 1436.3 | 1479.7 | 1492.9 | 1498.3 | 1505.2 | 1512.0 | 1526.0 | 1568.6 |
| 1849.4 | 3030.5 | 3050.8 | 3056.5 | 3060.2 | 3063.8 | 3076.8 | 3081.3 | 3092.5 |
| 3095.3 | 3106.5 | 3130.3 | 3137.2 | 3138.6 | 3796.4 |        |        |        |

**TS5**

|        |        |        |        |        |        |        |        |        |
|--------|--------|--------|--------|--------|--------|--------|--------|--------|
| -768.1 | 33.5   | 52.2   | 56.6   | 69.9   | 93.4   | 113.6  | 144.0  | 151.4  |
| 181.6  | 247.6  | 264.9  | 276.2  | 318.5  | 342.3  | 440.9  | 472.8  | 674.4  |
| 728.4  | 742.7  | 800.0  | 814.3  | 911.1  | 916.2  | 983.8  | 1016.4 | 1046.7 |
| 1056.6 | 1059.8 | 1083.6 | 1090.9 | 1119.9 | 1160.4 | 1193.5 | 1239.3 | 1245.7 |
| 1263.4 | 1291.0 | 1316.1 | 1326.3 | 1337.0 | 1356.5 | 1380.8 | 1409.1 | 1415.0 |
| 1416.1 | 1426.2 | 1480.7 | 1491.2 | 1501.0 | 1505.2 | 1508.4 | 1513.5 | 1554.1 |
| 1857.1 | 3028.3 | 3042.3 | 3052.5 | 3060.0 | 3069.2 | 3078.1 | 3078.9 | 3095.2 |
| 3096.5 | 3102.9 | 3130.0 | 3130.3 | 3137.8 | 3786.7 |        |        |        |

#### TS6

|        |        |        |        |        |        |        |        |        |
|--------|--------|--------|--------|--------|--------|--------|--------|--------|
| -872.8 | 36.8   | 46.5   | 66.0   | 84.6   | 122.9  | 132.9  | 140.7  | 167.2  |
| 191.0  | 247.2  | 264.8  | 319.9  | 335.1  | 405.3  | 438.6  | 483.4  | 668.3  |
| 732.7  | 760.0  | 809.3  | 833.9  | 910.9  | 921.1  | 969.7  | 1003.8 | 1011.5 |
| 1051.7 | 1062.6 | 1072.3 | 1092.7 | 1127.9 | 1164.8 | 1177.7 | 1227.8 | 1255.8 |
| 1274.9 | 1288.3 | 1314.9 | 1330.3 | 1338.3 | 1340.4 | 1385.2 | 1410.9 | 1415.3 |
| 1415.8 | 1426.0 | 1473.1 | 1486.6 | 1490.4 | 1495.4 | 1505.3 | 1506.8 | 1515.1 |
| 1836.3 | 3036.2 | 3045.3 | 3052.5 | 3055.1 | 3059.1 | 3066.5 | 3083.6 | 3094.8 |
| 3102.7 | 3113.1 | 3116.1 | 3128.7 | 3137.0 | 3765.9 |        |        |        |

#### TS7

|        |        |        |        |        |        |        |        |        |
|--------|--------|--------|--------|--------|--------|--------|--------|--------|
| -826.2 | 34.0   | 36.8   | 50.6   | 80.8   | 90.9   | 97.1   | 145.0  | 146.9  |
| 175.3  | 191.5  | 248.8  | 264.5  | 318.8  | 383.8  | 444.6  | 479.6  | 670.3  |
| 731.6  | 752.1  | 759.0  | 807.7  | 901.5  | 911.4  | 936.6  | 988.6  | 1010.0 |
| 1027.1 | 1043.5 | 1071.4 | 1089.5 | 1099.4 | 1159.2 | 1192.5 | 1232.6 | 1234.8 |
| 1257.1 | 1289.9 | 1320.9 | 1323.6 | 1336.3 | 1338.5 | 1384.3 | 1414.8 | 1416.7 |
| 1435.9 | 1488.8 | 1490.8 | 1498.8 | 1505.7 | 1506.6 | 1513.9 | 1522.5 | 1704.2 |
| 1892.1 | 3036.8 | 3043.4 | 3053.5 | 3059.7 | 3064.9 | 3066.1 | 3079.2 | 3084.8 |
| 3095.9 | 3109.8 | 3129.5 | 3138.0 | 3138.8 | 3794.1 |        |        |        |

## 2. Ethers

All frequencies are in  $\text{cm}^{-1}$ .

### (1) $\text{C}_3\text{H}_7\text{OCH}_3$

#### TS1'

|        |        |        |        |        |        |        |        |        |
|--------|--------|--------|--------|--------|--------|--------|--------|--------|
| -607.1 | 54.0   | 63.0   | 89.1   | 112.0  | 172.2  | 195.1  | 236.6  | 300.2  |
| 414.4  | 450.9  | 691.5  | 768.9  | 905.9  | 918.3  | 1017.5 | 1077.1 | 1085.5 |
| 1161.8 | 1178.4 | 1200.1 | 1245.4 | 1279.9 | 1326.0 | 1334.3 | 1375.3 | 1401.1 |
| 1417.7 | 1448.7 | 1486.4 | 1498.9 | 1506.6 | 1513.0 | 1529.2 | 1790.1 | 3000.2 |
| 3032.9 | 3045.7 | 3061.6 | 3078.0 | 3113.3 | 3135.8 | 3144.8 | 3161.4 | 3799.1 |

#### TS1

|         |        |        |        |        |        |        |        |        |
|---------|--------|--------|--------|--------|--------|--------|--------|--------|
| -1144.8 | 27.9   | 77.0   | 99.9   | 130.3  | 180.2  | 203.4  | 234.3  | 335.8  |
| 382.0   | 427.8  | 739.5  | 767.5  | 904.3  | 914.8  | 944.6  | 1040.3 | 1080.2 |
| 1154.7  | 1155.7 | 1192.2 | 1207.6 | 1275.8 | 1291.2 | 1303.0 | 1325.8 | 1339.4 |
| 1417.8  | 1437.2 | 1493.5 | 1499.0 | 1506.5 | 1512.4 | 1530.5 | 1593.7 | 3006.2 |
| 3036.1  | 3041.9 | 3062.5 | 3077.6 | 3111.1 | 3113.6 | 3136.4 | 3145.2 | 3794.8 |

#### TS2

|        |      |      |      |       |       |       |       |       |
|--------|------|------|------|-------|-------|-------|-------|-------|
| -397.8 | 45.9 | 66.4 | 67.9 | 115.2 | 129.1 | 192.9 | 233.0 | 246.9 |
|--------|------|------|------|-------|-------|-------|-------|-------|

|        |        |        |        |        |        |        |        |        |
|--------|--------|--------|--------|--------|--------|--------|--------|--------|
| 417.3  | 454.0  | 602.6  | 773.3  | 913.5  | 924.2  | 1025.0 | 1073.0 | 1142.2 |
| 1173.4 | 1183.4 | 1200.2 | 1245.7 | 1262.0 | 1295.2 | 1322.7 | 1406.0 | 1416.8 |
| 1428.4 | 1488.1 | 1495.9 | 1499.4 | 1506.1 | 1513.6 | 1519.1 | 1932.5 | 2996.2 |
| 3026.0 | 3060.2 | 3071.7 | 3087.0 | 3112.4 | 3134.3 | 3145.7 | 3168.3 | 3795.0 |

**TS3**

|        |        |        |        |        |        |        |        |        |
|--------|--------|--------|--------|--------|--------|--------|--------|--------|
| -918.1 | 83.6   | 115.5  | 133.1  | 151.8  | 204.7  | 230.1  | 237.8  | 396.9  |
| 413.9  | 447.4  | 639.1  | 766.2  | 918.1  | 943.3  | 1003.6 | 1014.4 | 1104.3 |
| 1152.2 | 1167.2 | 1192.8 | 1199.7 | 1244.4 | 1285.6 | 1325.3 | 1350.7 | 1413.3 |
| 1428.7 | 1483.7 | 1495.1 | 1498.7 | 1500.3 | 1507.9 | 1523.5 | 1584.0 | 2995.6 |
| 3026.2 | 3034.8 | 3053.4 | 3082.1 | 3110.9 | 3124.4 | 3153.7 | 3163.3 | 3752.9 |

**TS4**

|        |        |        |        |        |        |        |        |        |
|--------|--------|--------|--------|--------|--------|--------|--------|--------|
| -719.6 | 49.4   | 62.9   | 74.6   | 108.4  | 145.5  | 197.1  | 238.4  | 324.5  |
| 420.7  | 447.4  | 676.6  | 796.2  | 902.5  | 930.8  | 1019.3 | 1079.8 | 1116.8 |
| 1164.2 | 1188.6 | 1202.6 | 1230.2 | 1254.6 | 1295.3 | 1312.3 | 1334.3 | 1356.8 |
| 1425.6 | 1442.9 | 1483.4 | 1486.5 | 1493.3 | 1499.1 | 1513.0 | 1536.1 | 2991.7 |
| 3016.2 | 3040.9 | 3062.0 | 3067.8 | 3094.8 | 3118.3 | 3157.4 | 3167.0 | 3804.8 |

**TS4'**

|        |        |        |        |        |        |        |        |        |
|--------|--------|--------|--------|--------|--------|--------|--------|--------|
| -858.8 | 53.5   | 69.7   | 88.6   | 109.6  | 125.2  | 186.3  | 236.6  | 339.7  |
| 389.2  | 450.1  | 708.3  | 772.6  | 903.6  | 939.2  | 1018.4 | 1070.6 | 1080.0 |
| 1172.9 | 1190.8 | 1197.3 | 1241.1 | 1262.8 | 1285.7 | 1319.7 | 1324.5 | 1357.8 |
| 1421.7 | 1439.6 | 1476.5 | 1485.7 | 1499.3 | 1503.3 | 1512.9 | 1534.3 | 2992.9 |
| 3017.8 | 3025.7 | 3069.5 | 3072.0 | 3092.0 | 3118.8 | 3160.1 | 3162.5 | 3805.6 |

**(2) C<sub>4</sub>H<sub>9</sub>OCH<sub>3</sub>**

**TS1'**

|        |        |        |        |        |        |        |        |        |
|--------|--------|--------|--------|--------|--------|--------|--------|--------|
| -606.4 | 39.6   | 56.1   | 74.0   | 96.9   | 122.6  | 141.5  | 177.0  | 247.5  |
| 301.3  | 322.6  | 387.5  | 501.1  | 693.5  | 745.5  | 819.4  | 918.4  | 957.3  |
| 1008.2 | 1061.2 | 1084.6 | 1102.0 | 1160.6 | 1178.8 | 1200.4 | 1241.4 | 1260.4 |
| 1297.6 | 1324.2 | 1328.1 | 1365.8 | 1396.8 | 1401.8 | 1416.4 | 1449.8 | 1486.8 |
| 1494.5 | 1500.4 | 1505.4 | 1513.0 | 1529.3 | 1791.6 | 3001.4 | 3032.8 | 3046.3 |
| 3049.5 | 3061.2 | 3066.5 | 3080.7 | 3113.7 | 3132.8 | 3139.3 | 3161.4 | 3799.2 |

**TS1**

|         |        |        |        |        |        |        |        |        |
|---------|--------|--------|--------|--------|--------|--------|--------|--------|
| -1143.6 | 26.9   | 68.1   | 72.4   | 110.8  | 140.1  | 142.4  | 217.5  | 245.5  |
| 288.8   | 338.5  | 384.9  | 469.1  | 743.2  | 745.2  | 817.0  | 918.1  | 939.1  |
| 956.8   | 1040.2 | 1065.1 | 1092.9 | 1154.2 | 1155.8 | 1194.3 | 1206.8 | 1257.2 |
| 1290.6  | 1290.8 | 1308.4 | 1323.2 | 1328.5 | 1391.4 | 1417.4 | 1439.0 | 1493.5 |
| 1494.3  | 1500.3 | 1504.9 | 1513.1 | 1530.6 | 1595.5 | 3007.5 | 3035.8 | 3043.0 |
| 3050.3  | 3060.9 | 3066.1 | 3081.3 | 3110.7 | 3113.3 | 3132.6 | 3139.5 | 3794.8 |

**TS2**

|        |        |        |        |        |        |        |        |        |
|--------|--------|--------|--------|--------|--------|--------|--------|--------|
| -398.4 | 43.4   | 55.9   | 79.0   | 97.7   | 123.9  | 135.6  | 154.4  | 235.4  |
| 252.0  | 320.0  | 388.9  | 504.5  | 603.1  | 747.9  | 828.4  | 918.5  | 960.0  |
| 1023.1 | 1060.8 | 1087.8 | 1145.2 | 1173.1 | 1185.4 | 1200.9 | 1240.9 | 1252.7 |
| 1283.8 | 1290.9 | 1326.9 | 1381.8 | 1409.8 | 1417.0 | 1430.7 | 1486.4 | 1494.5 |
| 1499.4 | 1500.7 | 1505.7 | 1514.3 | 1518.5 | 1932.8 | 2998.1 | 3026.2 | 3046.9 |
| 3059.0 | 3061.8 | 3082.2 | 3087.2 | 3111.5 | 3132.3 | 3139.1 | 3168.2 | 3794.9 |

**TS3**

|        |        |        |        |        |        |        |        |        |
|--------|--------|--------|--------|--------|--------|--------|--------|--------|
| -873.0 | 66.7   | 84.9   | 107.2  | 115.3  | 140.9  | 181.2  | 231.8  | 253.9  |
| 321.3  | 382.2  | 406.8  | 493.7  | 660.1  | 738.5  | 822.4  | 926.4  | 980.2  |
| 1003.8 | 1032.3 | 1058.8 | 1123.1 | 1142.3 | 1176.0 | 1193.6 | 1198.9 | 1239.9 |
| 1265.3 | 1299.2 | 1306.8 | 1351.5 | 1386.9 | 1417.9 | 1429.5 | 1483.2 | 1485.7 |
| 1499.7 | 1505.3 | 1508.1 | 1510.0 | 1523.8 | 1576.7 | 2997.4 | 3025.8 | 3035.9 |
| 3037.0 | 3064.0 | 3081.5 | 3082.0 | 3104.2 | 3136.3 | 3143.9 | 3162.7 | 3752.0 |

**TS4**

|        |        |        |        |        |        |        |        |        |
|--------|--------|--------|--------|--------|--------|--------|--------|--------|
| -517.2 | 48.4   | 57.8   | 78.0   | 95.8   | 123.6  | 138.3  | 145.7  | 229.9  |
| 245.0  | 317.9  | 389.5  | 497.5  | 631.6  | 792.6  | 827.9  | 914.1  | 964.0  |
| 1012.3 | 1063.0 | 1095.5 | 1146.1 | 1176.0 | 1197.2 | 1202.8 | 1210.8 | 1244.5 |
| 1262.8 | 1293.5 | 1321.1 | 1351.3 | 1387.7 | 1412.8 | 1440.7 | 1485.2 | 1488.7 |
| 1496.5 | 1498.8 | 1500.7 | 1513.6 | 1536.6 | 1620.2 | 2991.6 | 3015.6 | 3039.9 |
| 3054.3 | 3057.4 | 3066.9 | 3076.6 | 3108.4 | 3125.0 | 3144.8 | 3156.7 | 3801.2 |

**TS5**

|        |        |        |        |        |        |        |        |        |
|--------|--------|--------|--------|--------|--------|--------|--------|--------|
| -770.8 | 47.5   | 59.1   | 95.9   | 125.3  | 128.6  | 143.2  | 160.9  | 238.9  |
| 322.3  | 328.4  | 388.9  | 499.8  | 738.3  | 795.4  | 820.1  | 903.3  | 952.5  |
| 1010.2 | 1058.5 | 1093.3 | 1114.2 | 1167.9 | 1183.9 | 1203.1 | 1206.9 | 1246.8 |
| 1250.1 | 1297.8 | 1316.9 | 1323.5 | 1354.1 | 1394.3 | 1439.8 | 1451.3 | 1480.0 |
| 1486.6 | 1487.9 | 1499.7 | 1504.2 | 1513.4 | 1534.6 | 2989.9 | 3016.0 | 3021.8 |
| 3036.7 | 3063.1 | 3067.0 | 3083.6 | 3095.3 | 3116.5 | 3158.4 | 3161.7 | 3801.8 |

**TS5'**

|        |        |        |        |        |        |        |        |        |
|--------|--------|--------|--------|--------|--------|--------|--------|--------|
| -718.4 | 41.6   | 49.2   | 74.3   | 80.6   | 117.4  | 139.1  | 147.3  | 237.5  |
| 289.3  | 342.1  | 388.0  | 495.2  | 718.5  | 750.5  | 821.0  | 946.4  | 978.7  |
| 1009.9 | 1059.4 | 1076.7 | 1107.8 | 1177.6 | 1191.7 | 1201.1 | 1233.3 | 1248.3 |
| 1259.0 | 1290.7 | 1320.1 | 1322.6 | 1335.2 | 1386.2 | 1437.5 | 1441.4 | 1484.5 |
| 1486.6 | 1499.4 | 1499.6 | 1505.7 | 1513.6 | 1534.5 | 2991.3 | 3016.1 | 3023.3 |
| 3059.3 | 3067.0 | 3069.6 | 3090.2 | 3094.0 | 3118.6 | 3157.7 | 3158.3 | 3807.2 |

**(3) C<sub>5</sub>H<sub>11</sub>OCH<sub>3</sub>****TS1'**

|        |        |        |        |        |        |        |        |        |
|--------|--------|--------|--------|--------|--------|--------|--------|--------|
| -606.6 | 32.8   | 43.1   | 60.2   | 77.3   | 108.0  | 113.3  | 135.6  | 181.4  |
| 246.0  | 263.2  | 302.6  | 318.3  | 435.3  | 518.3  | 694.6  | 734.9  | 775.8  |
| 866.9  | 909.3  | 989.8  | 1016.4 | 1039.8 | 1078.2 | 1089.5 | 1106.3 | 1161.1 |
| 1178.3 | 1199.9 | 1238.1 | 1245.9 | 1276.1 | 1307.3 | 1324.4 | 1338.0 | 1348.2 |
| 1372.9 | 1402.1 | 1410.8 | 1415.3 | 1449.8 | 1486.7 | 1490.5 | 1494.0 | 1504.3 |
| 1505.1 | 1513.7 | 1529.1 | 1791.9 | 3001.7 | 3032.9 | 3035.7 | 3046.4 | 3054.7 |
| 3059.3 | 3065.8 | 3067.5 | 3092.5 | 3115.3 | 3129.4 | 3137.0 | 3161.3 | 3799.2 |

**TS1**

|         |        |        |        |        |        |        |        |        |
|---------|--------|--------|--------|--------|--------|--------|--------|--------|
| -1142.0 | 24.4   | 60.1   | 62.3   | 84.6   | 113.6  | 125.0  | 155.7  | 216.3  |
| 244.0   | 244.9  | 311.7  | 338.0  | 408.5  | 501.1  | 735.3  | 742.6  | 775.4  |
| 865.5   | 911.4  | 938.6  | 989.6  | 1036.7 | 1057.6 | 1085.0 | 1089.1 | 1156.2 |
| 1156.4  | 1194.8 | 1206.0 | 1243.2 | 1269.3 | 1290.4 | 1305.3 | 1307.3 | 1324.1 |
| 1338.0  | 1353.4 | 1408.7 | 1416.1 | 1438.9 | 1490.8 | 1493.5 | 1494.3 | 1504.4 |
| 1505.2  | 1514.0 | 1530.3 | 1595.5 | 3007.8 | 3035.6 | 3036.8 | 3043.3 | 3053.8 |

|             |        |        |        |        |        |        |        |        |
|-------------|--------|--------|--------|--------|--------|--------|--------|--------|
| 3059.3      | 3066.3 | 3066.8 | 3091.7 | 3110.6 | 3114.9 | 3129.2 | 3137.3 | 3794.7 |
| <b>TS2</b>  |        |        |        |        |        |        |        |        |
| -399.3      | 37.5   | 46.7   | 66.3   | 95.4   | 106.0  | 113.8  | 141.9  | 148.4  |
| 239.8       | 247.0  | 260.8  | 318.8  | 437.7  | 520.1  | 607.2  | 737.1  | 779.4  |
| 873.6       | 910.2  | 990.0  | 1026.9 | 1046.5 | 1080.2 | 1088.7 | 1148.9 | 1172.5 |
| 1186.1      | 1200.3 | 1236.8 | 1244.8 | 1269.8 | 1279.3 | 1314.1 | 1335.5 | 1345.6 |
| 1398.3      | 1412.7 | 1415.8 | 1430.9 | 1486.1 | 1492.1 | 1494.4 | 1499.9 | 1504.2 |
| 1505.0      | 1514.5 | 1518.6 | 1930.7 | 2998.8 | 3026.6 | 3033.1 | 3053.7 | 3058.5 |
| 3059.8      | 3068.3 | 3087.6 | 3092.0 | 3112.9 | 3128.5 | 3136.8 | 3168.3 | 3794.7 |
| <b>TS3</b>  |        |        |        |        |        |        |        |        |
| -872.1      | 58.6   | 67.9   | 84.2   | 91.8   | 125.8  | 157.6  | 171.2  | 233.3  |
| 245.9       | 272.9  | 318.9  | 407.5  | 432.2  | 497.1  | 674.7  | 732.3  | 773.2  |
| 879.0       | 910.0  | 1002.7 | 1009.0 | 1022.3 | 1050.1 | 1085.1 | 1119.1 | 1149.4 |
| 1177.1      | 1193.5 | 1197.8 | 1236.0 | 1252.4 | 1279.7 | 1295.0 | 1331.6 | 1348.5 |
| 1354.4      | 1406.3 | 1416.4 | 1429.7 | 1481.4 | 1483.9 | 1497.5 | 1499.7 | 1505.4 |
| 1508.2      | 1512.0 | 1523.6 | 1576.3 | 2997.6 | 3022.9 | 3025.9 | 3036.6 | 3056.6 |
| 3059.5      | 3069.7 | 3081.5 | 3095.9 | 3105.3 | 3129.1 | 3138.3 | 3162.6 | 3752.0 |
| <b>TS4</b>  |        |        |        |        |        |        |        |        |
| -498.1      | 46.0   | 56.3   | 67.1   | 87.4   | 104.4  | 120.7  | 131.6  | 163.0  |
| 238.8       | 251.9  | 264.3  | 318.0  | 437.2  | 514.0  | 625.4  | 763.0  | 796.1  |
| 886.4       | 911.8  | 988.4  | 1018.2 | 1044.9 | 1084.7 | 1097.5 | 1147.3 | 1177.5 |
| 1197.1      | 1200.0 | 1216.3 | 1240.4 | 1256.7 | 1282.5 | 1301.4 | 1314.3 | 1326.6 |
| 1360.1      | 1401.0 | 1412.7 | 1440.5 | 1482.4 | 1486.3 | 1493.1 | 1499.6 | 1504.3 |
| 1510.5      | 1513.2 | 1535.9 | 1638.5 | 2991.7 | 3015.7 | 3037.0 | 3044.8 | 3056.7 |
| 3058.1      | 3061.3 | 3067.1 | 3091.6 | 3110.0 | 3129.2 | 3140.1 | 3157.1 | 3798.4 |
| <b>TS5</b>  |        |        |        |        |        |        |        |        |
| -531.0      | 41.7   | 52.7   | 75.3   | 104.6  | 109.3  | 124.0  | 140.8  | 149.2  |
| 232.3       | 240.5  | 266.2  | 316.9  | 432.5  | 516.9  | 633.2  | 750.6  | 808.7  |
| 880.0       | 917.7  | 984.5  | 1017.6 | 1046.6 | 1087.8 | 1096.7 | 1143.8 | 1176.5 |
| 1195.4      | 1201.8 | 1238.4 | 1243.4 | 1248.8 | 1276.0 | 1314.7 | 1319.2 | 1338.0 |
| 1348.6      | 1403.3 | 1411.0 | 1440.0 | 1482.5 | 1486.4 | 1494.8 | 1499.8 | 1500.0 |
| 1503.9      | 1513.1 | 1534.2 | 1591.7 | 2990.2 | 3015.8 | 3022.2 | 3029.3 | 3054.7 |
| 3062.9      | 3066.7 | 3069.9 | 3086.0 | 3114.6 | 3123.4 | 3147.3 | 3158.0 | 3797.0 |
| <b>TS6</b>  |        |        |        |        |        |        |        |        |
| -742.7      | 42.1   | 48.5   | 74.6   | 94.6   | 110.3  | 113.7  | 133.5  | 162.3  |
| 239.1       | 264.7  | 318.0  | 322.3  | 436.0  | 518.1  | 725.4  | 763.0  | 800.8  |
| 867.5       | 901.4  | 986.3  | 1016.4 | 1038.8 | 1084.5 | 1089.9 | 1124.4 | 1173.8 |
| 1184.2      | 1201.9 | 1208.2 | 1241.4 | 1244.8 | 1280.7 | 1297.0 | 1323.7 | 1327.8 |
| 1349.3      | 1360.4 | 1409.1 | 1440.5 | 1458.3 | 1481.9 | 1486.1 | 1496.2 | 1499.1 |
| 1503.3      | 1508.4 | 1514.1 | 1534.4 | 2988.5 | 3014.8 | 3020.1 | 3034.7 | 3040.3 |
| 3065.2      | 3065.3 | 3075.5 | 3087.5 | 3098.3 | 3115.0 | 3157.3 | 3158.9 | 3804.6 |
| <b>TS6'</b> |        |        |        |        |        |        |        |        |
| -794.7      | 36.9   | 51.2   | 68.8   | 89.4   | 95.8   | 116.4  | 137.5  | 146.9  |
| 239.1       | 249.0  | 309.0  | 340.7  | 428.5  | 510.7  | 724.0  | 741.3  | 780.9  |
| 867.6       | 928.4  | 990.7  | 1008.2 | 1032.1 | 1070.5 | 1086.8 | 1109.9 | 1178.2 |

|        |        |        |        |        |        |        |        |        |
|--------|--------|--------|--------|--------|--------|--------|--------|--------|
| 1196.9 | 1199.6 | 1232.7 | 1239.6 | 1267.8 | 1290.9 | 1313.3 | 1324.6 | 1330.2 |
| 1337.1 | 1371.0 | 1401.8 | 1439.3 | 1441.8 | 1477.8 | 1486.2 | 1494.5 | 1496.6 |
| 1499.6 | 1509.0 | 1514.0 | 1534.3 | 2989.2 | 3015.6 | 3020.4 | 3040.4 | 3054.0 |
| 3066.4 | 3067.0 | 3072.9 | 3088.7 | 3098.3 | 3116.2 | 3157.5 | 3158.2 | 3806.0 |

**(4) C<sub>6</sub>H<sub>13</sub>OCH<sub>3</sub>**

**TS1'**

|         |        |        |        |        |        |        |        |        |
|---------|--------|--------|--------|--------|--------|--------|--------|--------|
| -1137.4 | 18.8   | 48.6   | 53.0   | 76.8   | 98.0   | 104.1  | 142.6  | 154.3  |
| 194.2   | 209.8  | 245.2  | 285.5  | 332.2  | 337.1  | 466.0  | 494.0  | 731.1  |
| 742.4   | 753.3  | 812.8  | 905.6  | 911.2  | 938.7  | 1011.2 | 1022.0 | 1060.3 |
| 1071.0  | 1087.7 | 1096.6 | 1156.2 | 1157.1 | 1195.2 | 1205.8 | 1233.7 | 1255.6 |
| 1286.6  | 1293.2 | 1305.2 | 1320.7 | 1324.7 | 1334.4 | 1338.0 | 1384.9 | 1414.4 |
| 1416.6  | 1439.2 | 1488.6 | 1490.3 | 1493.9 | 1498.3 | 1504.8 | 1506.9 | 1514.2 |
| 1530.3  | 1594.5 | 3007.7 | 3035.1 | 3035.9 | 3041.0 | 3043.2 | 3052.3 | 3059.0 |
| 3062.7  | 3066.3 | 3076.4 | 3094.8 | 3110.6 | 3115.4 | 3128.8 | 3136.4 | 3794.8 |

**TS1**

|        |        |        |        |        |        |        |        |        |
|--------|--------|--------|--------|--------|--------|--------|--------|--------|
| -606.4 | 28.7   | 41.1   | 62.6   | 71.4   | 88.0   | 96.2   | 124.8  | 144.6  |
| 181.4  | 207.9  | 246.3  | 284.8  | 302.1  | 360.7  | 479.7  | 510.6  | 693.9  |
| 731.0  | 753.6  | 813.3  | 906.4  | 910.9  | 1002.9 | 1011.3 | 1047.0 | 1060.9 |
| 1084.7 | 1091.8 | 1111.7 | 1161.6 | 1178.4 | 1199.9 | 1235.0 | 1236.2 | 1263.8 |
| 1289.8 | 1320.8 | 1322.6 | 1334.1 | 1337.7 | 1364.9 | 1389.5 | 1402.3 | 1414.2 |
| 1416.6 | 1449.7 | 1486.8 | 1488.4 | 1490.5 | 1498.3 | 1504.7 | 1507.0 | 1514.2 |
| 1529.2 | 1792.4 | 3001.6 | 3032.8 | 3034.7 | 3040.4 | 3046.3 | 3051.8 | 3058.6 |
| 3062.2 | 3067.0 | 3075.8 | 3094.5 | 3115.7 | 3128.4 | 3135.7 | 3161.3 | 3799.2 |

**TS2**

|        |        |        |        |        |        |        |        |        |
|--------|--------|--------|--------|--------|--------|--------|--------|--------|
| -398.9 | 34.6   | 36.8   | 53.9   | 84.2   | 95.7   | 110.0  | 112.2  | 140.9  |
| 156.6  | 205.9  | 240.0  | 247.8  | 285.6  | 359.6  | 481.9  | 512.6  | 605.9  |
| 732.3  | 755.3  | 818.6  | 909.7  | 911.7  | 1010.6 | 1011.3 | 1052.4 | 1068.3 |
| 1083.8 | 1093.6 | 1151.0 | 1172.4 | 1186.4 | 1200.3 | 1232.7 | 1236.1 | 1261.1 |
| 1273.8 | 1297.7 | 1317.1 | 1333.0 | 1335.0 | 1376.6 | 1406.3 | 1414.0 | 1416.0 |
| 1430.7 | 1485.6 | 1489.8 | 1491.9 | 1497.1 | 1499.8 | 1505.2 | 1507.3 | 1514.7 |
| 1518.6 | 1931.5 | 2998.7 | 3026.6 | 3032.9 | 3039.7 | 3051.5 | 3058.7 | 3059.5 |
| 3064.3 | 3076.4 | 3087.6 | 3094.7 | 3113.4 | 3128.6 | 3136.0 | 3168.2 | 3794.8 |

**TS3**

|        |        |        |        |        |        |        |        |        |
|--------|--------|--------|--------|--------|--------|--------|--------|--------|
| -871.4 | 41.5   | 62.0   | 73.5   | 84.3   | 115.2  | 127.9  | 153.5  | 165.0  |
| 221.0  | 233.6  | 249.1  | 287.7  | 354.1  | 405.3  | 472.8  | 494.6  | 673.2  |
| 730.3  | 750.3  | 815.6  | 911.6  | 921.5  | 998.2  | 1018.4 | 1025.9 | 1048.8 |
| 1068.1 | 1090.6 | 1121.6 | 1151.3 | 1178.4 | 1193.9 | 1197.8 | 1232.4 | 1241.8 |
| 1265.4 | 1288.3 | 1315.9 | 1325.6 | 1336.1 | 1352.1 | 1381.4 | 1414.8 | 1416.1 |
| 1429.7 | 1480.9 | 1484.1 | 1491.5 | 1499.8 | 1501.3 | 1505.2 | 1508.3 | 1513.7 |
| 1523.6 | 1577.3 | 2997.6 | 3023.8 | 3025.9 | 3036.4 | 3041.8 | 3051.5 | 3059.4 |
| 3067.3 | 3076.8 | 3081.4 | 3096.8 | 3105.6 | 3129.6 | 3136.6 | 3162.6 | 3752.1 |

**TS4**

|        |       |       |       |       |       |       |       |       |
|--------|-------|-------|-------|-------|-------|-------|-------|-------|
| -499.5 | 42.8  | 54.5  | 60.7  | 63.1  | 79.9  | 104.2 | 113.4 | 148.3 |
| 169.7  | 208.5 | 237.4 | 245.6 | 285.9 | 355.6 | 482.1 | 506.1 | 627.1 |

|        |        |        |        |        |        |        |        |        |
|--------|--------|--------|--------|--------|--------|--------|--------|--------|
| 740.9  | 794.8  | 819.1  | 911.7  | 919.2  | 1002.7 | 1009.0 | 1048.6 | 1072.5 |
| 1088.1 | 1098.9 | 1150.0 | 1178.0 | 1197.6 | 1198.2 | 1214.4 | 1234.4 | 1254.2 |
| 1276.7 | 1282.2 | 1306.7 | 1319.5 | 1328.4 | 1343.7 | 1381.0 | 1408.7 | 1415.9 |
| 1440.4 | 1479.9 | 1485.9 | 1492.0 | 1498.4 | 1498.9 | 1504.8 | 1512.0 | 1513.5 |
| 1535.6 | 1636.1 | 2992.0 | 3015.8 | 3030.9 | 3037.2 | 3048.4 | 3056.6 | 3059.9 |
| 3061.2 | 3067.1 | 3075.1 | 3094.0 | 3110.2 | 3130.1 | 3137.6 | 3156.9 | 3798.3 |

**TS5**

|        |        |        |        |        |        |        |        |        |
|--------|--------|--------|--------|--------|--------|--------|--------|--------|
| -515.0 | 42.1   | 44.5   | 58.7   | 81.5   | 83.4   | 111.1  | 128.9  | 133.6  |
| 161.3  | 207.1  | 237.4  | 252.7  | 285.2  | 361.4  | 481.2  | 509.5  | 630.7  |
| 748.8  | 776.4  | 820.4  | 910.9  | 928.0  | 1004.7 | 1009.8 | 1050.8 | 1064.0 |
| 1090.5 | 1100.2 | 1149.0 | 1176.5 | 1194.4 | 1201.5 | 1226.0 | 1234.4 | 1247.0 |
| 1270.4 | 1294.0 | 1312.5 | 1324.8 | 1329.6 | 1355.3 | 1384.1 | 1407.6 | 1416.3 |
| 1440.0 | 1480.1 | 1485.8 | 1489.8 | 1498.9 | 1503.4 | 1504.6 | 1511.3 | 1513.3 |
| 1534.1 | 1604.4 | 2989.9 | 3015.6 | 3021.9 | 3030.3 | 3041.4 | 3060.5 | 3061.7 |
| 3063.4 | 3066.4 | 3077.6 | 3090.3 | 3114.4 | 3132.3 | 3142.2 | 3157.6 | 3797.0 |

**TS6**

|        |        |        |        |        |        |        |        |        |
|--------|--------|--------|--------|--------|--------|--------|--------|--------|
| -506.7 | 36.0   | 43.4   | 60.9   | 80.8   | 89.3   | 101.2  | 111.8  | 143.1  |
| 150.4  | 206.3  | 237.9  | 242.3  | 286.2  | 356.8  | 478.8  | 509.4  | 621.9  |
| 742.0  | 785.7  | 847.1  | 908.7  | 916.9  | 1003.7 | 1006.8 | 1052.6 | 1067.2 |
| 1091.5 | 1094.2 | 1147.5 | 1178.5 | 1197.8 | 1201.5 | 1230.2 | 1234.4 | 1235.8 |
| 1265.4 | 1295.6 | 1319.1 | 1320.0 | 1329.6 | 1339.5 | 1378.9 | 1409.9 | 1412.6 |
| 1440.4 | 1480.9 | 1485.9 | 1495.3 | 1495.6 | 1499.6 | 1500.6 | 1507.1 | 1513.7 |
| 1534.1 | 1639.1 | 2988.3 | 3014.7 | 3019.8 | 3030.1 | 3037.5 | 3055.3 | 3064.7 |
| 3065.0 | 3067.4 | 3075.7 | 3090.7 | 3114.5 | 3123.8 | 3146.6 | 3157.3 | 3799.9 |

**TS7**

|        |        |        |        |        |        |        |        |        |
|--------|--------|--------|--------|--------|--------|--------|--------|--------|
| -749.8 | 33.2   | 42.7   | 65.3   | 86.9   | 97.0   | 114.4  | 126.2  | 148.7  |
| 163.9  | 208.6  | 240.1  | 286.2  | 322.2  | 360.3  | 481.7  | 508.9  | 727.5  |
| 749.3  | 788.0  | 819.2  | 887.4  | 917.7  | 1002.5 | 1005.7 | 1045.9 | 1064.3 |
| 1086.2 | 1094.9 | 1129.9 | 1174.3 | 1182.8 | 1201.6 | 1206.5 | 1233.4 | 1238.8 |
| 1269.4 | 1280.6 | 1313.2 | 1324.0 | 1332.8 | 1338.2 | 1352.7 | 1387.7 | 1414.0 |
| 1440.5 | 1456.3 | 1480.3 | 1486.1 | 1492.0 | 1495.3 | 1499.0 | 1499.6 | 1509.8 |
| 1514.3 | 1534.3 | 2988.9 | 3014.3 | 3020.1 | 3034.2 | 3035.7 | 3043.2 | 3064.0 |
| 3065.1 | 3067.6 | 3079.6 | 3090.0 | 3100.2 | 3113.7 | 3157.3 | 3159.0 | 3803.4 |

**TS7'**

|        |        |        |        |        |        |        |        |        |
|--------|--------|--------|--------|--------|--------|--------|--------|--------|
| -775.5 | 33.9   | 42.1   | 52.2   | 73.1   | 87.0   | 101.5  | 110.8  | 145.4  |
| 153.6  | 196.6  | 239.7  | 280.8  | 327.0  | 358.8  | 469.5  | 509.5  | 728.6  |
| 739.4  | 765.1  | 819.4  | 904.9  | 919.7  | 1003.4 | 1011.3 | 1031.9 | 1055.1 |
| 1083.3 | 1087.7 | 1117.6 | 1179.0 | 1196.6 | 1200.2 | 1227.0 | 1233.2 | 1259.4 |
| 1277.3 | 1301.1 | 1311.9 | 1319.5 | 1333.8 | 1337.1 | 1354.7 | 1387.0 | 1409.2 |
| 1440.4 | 1451.8 | 1479.8 | 1485.9 | 1491.7 | 1494.0 | 1499.5 | 1502.0 | 1510.3 |
| 1514.3 | 1534.3 | 2988.8 | 3015.2 | 3019.9 | 3037.2 | 3044.2 | 3054.8 | 3065.7 |
| 3066.0 | 3066.8 | 3082.1 | 3088.4 | 3102.0 | 3114.9 | 3156.2 | 3157.7 | 3806.1 |

**(5) C<sub>5</sub>H<sub>11</sub>OC<sub>2</sub>H<sub>5</sub>**

**TS1'**

|        |        |        |        |        |        |        |        |        |
|--------|--------|--------|--------|--------|--------|--------|--------|--------|
| -890.2 | 28.5   | 41.2   | 49.3   | 80.1   | 84.7   | 107.8  | 110.7  | 133.2  |
| 168.7  | 194.2  | 243.3  | 285.7  | 327.4  | 361.2  | 489.9  | 501.1  | 734.8  |
| 767.5  | 775.0  | 832.5  | 866.5  | 905.1  | 919.9  | 989.9  | 1026.2 | 1052.7 |
| 1059.7 | 1088.8 | 1093.1 | 1154.1 | 1180.8 | 1189.5 | 1200.6 | 1226.4 | 1244.1 |
| 1271.3 | 1292.7 | 1303.8 | 1309.9 | 1323.0 | 1337.7 | 1350.8 | 1398.0 | 1402.6 |
| 1413.0 | 1415.2 | 1454.5 | 1485.8 | 1490.7 | 1493.8 | 1503.7 | 1504.2 | 1513.4 |
| 1521.8 | 1537.2 | 2995.4 | 3018.0 | 3027.8 | 3035.6 | 3052.2 | 3053.1 | 3058.5 |
| 3065.3 | 3065.5 | 3090.6 | 3110.5 | 3113.0 | 3128.3 | 3136.0 | 3183.9 | 3808.4 |

**TS1**

|         |        |        |        |        |        |        |        |        |
|---------|--------|--------|--------|--------|--------|--------|--------|--------|
| -1218.0 | 33.1   | 41.2   | 72.4   | 96.2   | 104.6  | 138.4  | 164.0  | 175.7  |
| 213.9   | 247.6  | 291.3  | 353.1  | 362.7  | 423.8  | 493.7  | 500.5  | 706.5  |
| 734.5   | 774.2  | 863.5  | 874.7  | 912.9  | 929.8  | 974.3  | 991.0  | 1044.0 |
| 1068.4  | 1088.4 | 1091.3 | 1148.9 | 1163.8 | 1190.4 | 1195.8 | 1210.9 | 1243.8 |
| 1271.8  | 1280.6 | 1307.2 | 1315.5 | 1324.7 | 1338.2 | 1351.8 | 1398.4 | 1413.0 |
| 1416.0  | 1446.7 | 1463.4 | 1490.3 | 1493.4 | 1503.4 | 1505.5 | 1511.0 | 1514.6 |
| 1525.4  | 1535.8 | 3001.5 | 3008.2 | 3036.5 | 3038.3 | 3046.9 | 3053.5 | 3059.1 |
| 3062.6  | 3066.7 | 3091.2 | 3111.5 | 3114.3 | 3128.9 | 3137.4 | 3191.7 | 3753.2 |

**TS2**

|        |        |        |        |        |        |        |        |        |
|--------|--------|--------|--------|--------|--------|--------|--------|--------|
| -419.5 | 36.2   | 39.1   | 60.6   | 85.1   | 100.3  | 105.6  | 117.5  | 130.7  |
| 173.7  | 205.2  | 245.1  | 250.1  | 295.1  | 354.4  | 499.7  | 504.9  | 600.7  |
| 735.2  | 775.8  | 858.4  | 871.1  | 906.3  | 930.4  | 990.2  | 1043.1 | 1060.5 |
| 1088.2 | 1091.5 | 1135.1 | 1156.3 | 1176.8 | 1197.0 | 1201.4 | 1245.0 | 1265.0 |
| 1271.7 | 1307.6 | 1324.0 | 1338.0 | 1350.3 | 1373.9 | 1392.4 | 1412.0 | 1415.4 |
| 1417.5 | 1462.0 | 1485.1 | 1490.9 | 1494.1 | 1502.7 | 1504.4 | 1504.8 | 1514.0 |
| 1529.8 | 1904.5 | 2998.7 | 3012.7 | 3035.3 | 3039.9 | 3053.5 | 3058.6 | 3065.3 |
| 3067.0 | 3073.5 | 3091.2 | 3114.7 | 3128.4 | 3136.3 | 3149.8 | 3161.9 | 3796.8 |

**TS3**

|        |        |        |        |        |        |        |        |        |
|--------|--------|--------|--------|--------|--------|--------|--------|--------|
| -396.3 | 36.0   | 43.6   | 50.5   | 68.6   | 82.7   | 105.9  | 117.2  | 135.8  |
| 173.3  | 204.5  | 245.6  | 254.5  | 294.9  | 357.0  | 497.4  | 504.8  | 605.8  |
| 736.5  | 778.4  | 824.3  | 873.9  | 903.1  | 923.8  | 989.9  | 1043.6 | 1066.6 |
| 1088.1 | 1091.3 | 1135.0 | 1172.1 | 1183.2 | 1192.1 | 1200.3 | 1244.5 | 1265.0 |
| 1277.9 | 1313.8 | 1316.5 | 1335.1 | 1344.8 | 1387.5 | 1398.2 | 1411.7 | 1415.5 |
| 1417.7 | 1465.3 | 1489.4 | 1489.5 | 1492.5 | 1503.4 | 1505.0 | 1506.6 | 1514.3 |
| 1534.5 | 1936.7 | 2999.6 | 3016.6 | 3032.9 | 3053.4 | 3058.4 | 3058.5 | 3059.5 |
| 3068.4 | 3074.9 | 3091.8 | 3112.5 | 3128.4 | 3136.6 | 3152.3 | 3156.8 | 3794.9 |

**TS4**

|        |        |        |        |        |        |        |        |        |
|--------|--------|--------|--------|--------|--------|--------|--------|--------|
| -874.8 | 43.7   | 62.2   | 67.9   | 78.1   | 88.8   | 145.1  | 163.3  | 173.6  |
| 210.6  | 245.3  | 256.0  | 296.3  | 356.7  | 407.7  | 477.8  | 501.8  | 672.7  |
| 732.4  | 773.1  | 824.0  | 879.4  | 902.3  | 923.8  | 1002.8 | 1020.4 | 1050.9 |
| 1060.8 | 1087.6 | 1118.5 | 1141.0 | 1175.4 | 1179.2 | 1194.3 | 1199.5 | 1249.8 |
| 1276.1 | 1292.5 | 1313.5 | 1331.3 | 1347.8 | 1352.5 | 1392.1 | 1406.7 | 1416.2 |
| 1417.4 | 1456.7 | 1481.5 | 1490.6 | 1497.4 | 1504.8 | 1505.4 | 1511.2 | 1512.5 |
| 1536.4 | 1577.7 | 2998.2 | 3016.4 | 3022.8 | 3037.4 | 3049.2 | 3056.6 | 3059.4 |
| 3069.5 | 3073.8 | 3095.8 | 3104.9 | 3129.0 | 3138.2 | 3151.0 | 3155.6 | 3748.3 |

**TS5**

|        |        |        |        |        |        |        |        |        |
|--------|--------|--------|--------|--------|--------|--------|--------|--------|
| -497.1 | 40.7   | 44.2   | 56.6   | 81.3   | 87.3   | 108.8  | 119.2  | 128.9  |
| 173.7  | 204.8  | 252.4  | 255.2  | 294.2  | 358.6  | 497.1  | 503.7  | 625.0  |
| 762.9  | 794.1  | 824.9  | 886.0  | 904.4  | 925.0  | 988.3  | 1045.2 | 1062.8 |
| 1091.1 | 1097.4 | 1135.4 | 1178.7 | 1182.0 | 1197.4 | 1206.6 | 1217.8 | 1252.0 |
| 1278.0 | 1300.5 | 1311.1 | 1314.6 | 1326.6 | 1358.7 | 1392.6 | 1401.7 | 1412.6 |
| 1420.5 | 1463.9 | 1482.8 | 1488.9 | 1492.5 | 1504.1 | 1506.0 | 1510.4 | 1523.9 |
| 1541.8 | 1639.9 | 2992.2 | 3005.6 | 3035.3 | 3038.3 | 3044.8 | 3056.4 | 3058.1 |
| 3061.0 | 3073.5 | 3091.4 | 3109.6 | 3129.1 | 3139.9 | 3150.8 | 3154.8 | 3798.4 |

**TS6**

|        |        |        |        |        |        |        |        |        |
|--------|--------|--------|--------|--------|--------|--------|--------|--------|
| -529.9 | 32.9   | 44.9   | 63.6   | 90.4   | 93.8   | 115.8  | 120.0  | 152.8  |
| 165.7  | 204.2  | 238.7  | 252.5  | 294.8  | 353.6  | 499.5  | 503.1  | 635.6  |
| 750.0  | 807.4  | 825.1  | 880.5  | 907.0  | 928.1  | 984.6  | 1047.2 | 1063.0 |
| 1092.8 | 1097.5 | 1133.2 | 1176.6 | 1183.2 | 1196.2 | 1206.6 | 1242.7 | 1249.1 |
| 1268.0 | 1308.8 | 1315.4 | 1320.0 | 1337.4 | 1346.1 | 1392.0 | 1404.0 | 1411.2 |
| 1420.8 | 1463.6 | 1482.7 | 1488.3 | 1495.3 | 1500.4 | 1503.3 | 1506.3 | 1522.9 |
| 1540.8 | 1594.5 | 2990.8 | 3005.7 | 3023.4 | 3029.2 | 3034.7 | 3054.8 | 3062.6 |
| 3069.7 | 3073.8 | 3085.8 | 3114.2 | 3123.4 | 3147.3 | 3151.2 | 3155.2 | 3797.2 |

**TS7**

|        |        |        |        |        |        |        |        |        |
|--------|--------|--------|--------|--------|--------|--------|--------|--------|
| -743.3 | 29.7   | 42.5   | 66.7   | 82.6   | 88.5   | 94.3   | 124.6  | 139.9  |
| 173.4  | 206.8  | 254.0  | 294.6  | 320.9  | 357.5  | 501.8  | 503.3  | 725.8  |
| 762.9  | 799.6  | 823.9  | 867.0  | 898.5  | 919.5  | 986.3  | 1039.4 | 1060.3 |
| 1089.7 | 1091.5 | 1119.1 | 1163.4 | 1180.9 | 1192.3 | 1207.0 | 1208.6 | 1242.6 |
| 1274.9 | 1295.4 | 1310.7 | 1323.6 | 1327.6 | 1349.8 | 1357.5 | 1393.7 | 1408.2 |
| 1421.2 | 1458.5 | 1463.6 | 1481.8 | 1488.7 | 1495.7 | 1503.3 | 1505.5 | 1509.0 |
| 1523.2 | 1540.7 | 2989.1 | 3004.6 | 3021.3 | 3033.4 | 3034.5 | 3040.2 | 3064.9 |
| 3073.8 | 3075.1 | 3087.4 | 3098.2 | 3114.6 | 3151.1 | 3155.2 | 3158.8 | 3804.4 |

**TS7'**

|        |        |        |        |        |        |        |        |        |
|--------|--------|--------|--------|--------|--------|--------|--------|--------|
| -793.5 | 35.0   | 43.5   | 47.4   | 72.5   | 86.3   | 100.5  | 112.2  | 133.5  |
| 167.5  | 194.6  | 252.3  | 290.3  | 328.9  | 354.0  | 490.5  | 503.3  | 722.4  |
| 740.4  | 779.8  | 823.3  | 868.0  | 910.8  | 933.3  | 990.6  | 1026.5 | 1053.3 |
| 1079.6 | 1089.1 | 1107.3 | 1170.5 | 1179.7 | 1198.7 | 1206.4 | 1237.3 | 1258.1 |
| 1290.2 | 1308.8 | 1315.4 | 1324.5 | 1328.7 | 1336.8 | 1369.6 | 1392.8 | 1402.4 |
| 1420.2 | 1442.0 | 1463.7 | 1478.1 | 1488.3 | 1494.4 | 1496.5 | 1505.5 | 1509.9 |
| 1523.3 | 1541.0 | 2989.7 | 3005.3 | 3021.6 | 3034.3 | 3040.3 | 3053.6 | 3066.6 |
| 3072.8 | 3073.9 | 3088.7 | 3098.2 | 3115.8 | 3151.3 | 3155.3 | 3157.5 | 3805.9 |

**(6) C<sub>4</sub>H<sub>9</sub>OC<sub>3</sub>H<sub>7</sub>**

**TS1'**

|        |        |        |        |        |        |        |        |        |
|--------|--------|--------|--------|--------|--------|--------|--------|--------|
| -854.5 | 33.7   | 46.2   | 48.5   | 78.8   | 86.1   | 100.7  | 107.9  | 137.2  |
| 169.0  | 194.9  | 246.1  | 287.1  | 333.1  | 348.2  | 493.0  | 499.4  | 710.2  |
| 743.9  | 771.5  | 817.5  | 903.2  | 917.9  | 945.1  | 957.8  | 1029.9 | 1058.1 |
| 1079.1 | 1086.5 | 1097.0 | 1164.6 | 1178.4 | 1197.7 | 1203.8 | 1254.9 | 1263.6 |
| 1281.6 | 1295.9 | 1318.5 | 1321.0 | 1325.9 | 1327.8 | 1356.4 | 1388.8 | 1414.7 |
| 1416.8 | 1429.7 | 1464.0 | 1476.8 | 1493.8 | 1499.5 | 1503.8 | 1504.8 | 1512.4 |
| 1521.6 | 1538.4 | 2990.3 | 2998.5 | 3025.2 | 3027.4 | 3049.1 | 3060.0 | 3065.1 |

|            |        |        |        |        |        |        |        |        |
|------------|--------|--------|--------|--------|--------|--------|--------|--------|
| 3071.6     | 3079.6 | 3091.8 | 3111.3 | 3118.4 | 3131.5 | 3137.8 | 3162.2 | 3805.6 |
| <b>TS1</b> |        |        |        |        |        |        |        |        |
| -718.4     | 29.8   | 39.8   | 62.7   | 69.9   | 84.9   | 94.2   | 123.2  | 134.1  |
| 177.5      | 205.5  | 249.7  | 295.1  | 324.3  | 352.3  | 493.6  | 511.1  | 680.1  |
| 744.1      | 796.2  | 818.3  | 901.7  | 920.6  | 931.9  | 957.8  | 1037.7 | 1060.1 |
| 1084.2     | 1092.8 | 1122.5 | 1159.8 | 1182.2 | 1194.9 | 1205.8 | 1233.5 | 1259.1 |
| 1290.8     | 1296.2 | 1310.1 | 1322.1 | 1327.1 | 1334.1 | 1353.8 | 1388.7 | 1415.8 |
| 1418.5     | 1432.6 | 1465.9 | 1484.6 | 1493.2 | 1494.6 | 1500.0 | 1505.4 | 1512.6 |
| 1523.0     | 1540.1 | 2989.5 | 2996.7 | 3024.6 | 3042.1 | 3048.9 | 3059.4 | 3061.8 |
| 3064.5     | 3079.3 | 3094.5 | 3110.6 | 3117.8 | 3130.9 | 3137.0 | 3166.4 | 3805.1 |
| <b>TS2</b> |        |        |        |        |        |        |        |        |
| -921.0     | 36.6   | 45.1   | 75.0   | 107.6  | 121.0  | 133.4  | 156.7  | 174.7  |
| 207.6      | 233.7  | 249.7  | 290.4  | 348.1  | 414.1  | 492.8  | 505.5  | 639.3  |
| 744.0      | 766.4  | 817.5  | 913.8  | 923.8  | 944.3  | 959.3  | 1007.6 | 1034.7 |
| 1059.4     | 1092.8 | 1111.0 | 1148.2 | 1168.5 | 1184.3 | 1195.1 | 1196.7 | 1258.0 |
| 1285.0     | 1294.3 | 1322.7 | 1324.7 | 1328.8 | 1349.1 | 1388.4 | 1412.5 | 1414.3 |
| 1417.2     | 1458.7 | 1493.6 | 1495.0 | 1499.2 | 1499.5 | 1505.7 | 1509.6 | 1514.0 |
| 1533.0     | 1584.8 | 2995.4 | 3005.3 | 3035.4 | 3038.1 | 3049.7 | 3053.1 | 3060.1 |
| 3063.1     | 3080.7 | 3109.8 | 3110.5 | 3124.1 | 3132.3 | 3139.3 | 3153.4 | 3748.4 |
| <b>TS3</b> |        |        |        |        |        |        |        |        |
| -393.0     | 34.8   | 44.1   | 49.4   | 75.0   | 83.4   | 89.2   | 112.1  | 134.9  |
| 178.7      | 200.6  | 239.0  | 248.4  | 295.5  | 352.6  | 496.8  | 506.4  | 603.3  |
| 744.4      | 773.7  | 818.3  | 912.3  | 918.6  | 929.0  | 957.7  | 1037.8 | 1057.1 |
| 1081.0     | 1095.2 | 1140.3 | 1166.5 | 1184.8 | 1197.9 | 1200.7 | 1253.9 | 1265.6 |
| 1292.0     | 1296.9 | 1321.3 | 1326.4 | 1328.8 | 1385.3 | 1406.2 | 1409.6 | 1416.5 |
| 1417.8     | 1466.4 | 1493.3 | 1494.6 | 1500.4 | 1505.0 | 1505.9 | 1513.0 | 1513.9 |
| 1531.1     | 1942.1 | 2996.5 | 3004.2 | 3045.4 | 3049.5 | 3059.9 | 3060.1 | 3065.5 |
| 3071.4     | 3080.6 | 3112.1 | 3112.3 | 3131.5 | 3134.0 | 3137.7 | 3145.3 | 3795.6 |
| <b>TS4</b> |        |        |        |        |        |        |        |        |
| -395.0     | 38.9   | 45.8   | 51.4   | 58.0   | 80.5   | 105.6  | 114.5  | 145.0  |
| 176.9      | 206.4  | 236.9  | 247.2  | 295.6  | 345.7  | 497.2  | 507.8  | 604.9  |
| 746.6      | 767.4  | 827.6  | 904.5  | 913.3  | 927.3  | 960.7  | 1041.9 | 1055.7 |
| 1084.7     | 1089.5 | 1140.7 | 1167.4 | 1185.3 | 1196.8 | 1200.6 | 1250.5 | 1280.1 |
| 1280.8     | 1290.5 | 1326.2 | 1328.0 | 1336.2 | 1380.9 | 1405.0 | 1412.3 | 1416.6 |
| 1417.3     | 1466.6 | 1490.5 | 1498.7 | 1500.0 | 1505.0 | 1506.7 | 1512.8 | 1513.8 |
| 1530.7     | 1939.7 | 2997.9 | 3003.9 | 3044.9 | 3046.8 | 3058.5 | 3061.4 | 3061.5 |
| 3076.8     | 3082.3 | 3110.9 | 3112.3 | 3132.0 | 3135.2 | 3138.6 | 3143.3 | 3795.3 |
| <b>TS5</b> |        |        |        |        |        |        |        |        |
| -878.8     | 41.9   | 49.4   | 77.2   | 78.8   | 118.9  | 125.8  | 153.5  | 180.5  |
| 208.2      | 236.9  | 253.2  | 290.9  | 349.3  | 414.1  | 490.9  | 508.6  | 658.6  |
| 739.7      | 766.7  | 822.8  | 905.9  | 916.9  | 933.2  | 981.2  | 1020.7 | 1042.2 |
| 1055.8     | 1079.8 | 1124.5 | 1139.7 | 1176.4 | 1183.6 | 1194.8 | 1196.4 | 1262.7 |
| 1280.5     | 1295.0 | 1306.6 | 1326.0 | 1336.5 | 1351.3 | 1384.8 | 1412.7 | 1418.2 |
| 1418.4     | 1458.2 | 1485.7 | 1497.6 | 1505.2 | 1507.1 | 1508.9 | 1510.3 | 1513.7 |
| 1533.1     | 1577.6 | 2996.7 | 3004.4 | 3035.6 | 3036.5 | 3038.0 | 3062.3 | 3063.9 |

|            |        |        |        |        |        |        |        |        |
|------------|--------|--------|--------|--------|--------|--------|--------|--------|
| 3073.3     | 3081.8 | 3103.9 | 3110.6 | 3134.7 | 3136.1 | 3143.7 | 3145.2 | 3747.8 |
| <b>TS6</b> |        |        |        |        |        |        |        |        |
| -515.7     | 27.4   | 38.4   | 49.9   | 60.1   | 86.7   | 98.9   | 114.1  | 135.7  |
| 166.4      | 202.9  | 235.7  | 240.5  | 295.8  | 346.0  | 493.6  | 508.3  | 627.6  |
| 766.3      | 790.8  | 826.3  | 904.8  | 910.6  | 924.9  | 964.8  | 1038.2 | 1057.7 |
| 1083.5     | 1096.4 | 1142.6 | 1179.8 | 1186.3 | 1197.3 | 1205.3 | 1212.0 | 1261.8 |
| 1278.9     | 1287.4 | 1319.0 | 1325.7 | 1335.5 | 1351.1 | 1386.3 | 1412.6 | 1416.5 |
| 1419.1     | 1465.5 | 1487.5 | 1496.2 | 1498.1 | 1500.4 | 1506.8 | 1511.7 | 1522.8 |
| 1539.9     | 1621.0 | 2988.2 | 2996.2 | 3022.4 | 3040.9 | 3054.1 | 3057.2 | 3060.5 |
| 3075.8     | 3076.4 | 3107.9 | 3110.6 | 3124.8 | 3133.8 | 3141.8 | 3144.4 | 3800.9 |

|            |        |        |        |        |        |        |        |        |
|------------|--------|--------|--------|--------|--------|--------|--------|--------|
| <b>TS7</b> |        |        |        |        |        |        |        |        |
| -769.5     | 32.0   | 38.6   | 65.1   | 85.8   | 93.1   | 116.2  | 125.8  | 158.5  |
| 166.7      | 205.0  | 236.5  | 295.9  | 325.8  | 349.8  | 494.5  | 509.8  | 737.8  |
| 766.6      | 792.4  | 819.0  | 900.4  | 906.5  | 922.6  | 953.4  | 1033.9 | 1055.0 |
| 1082.1     | 1094.2 | 1116.7 | 1160.1 | 1184.0 | 1193.0 | 1202.3 | 1211.0 | 1248.2 |
| 1278.4     | 1293.4 | 1315.1 | 1320.9 | 1326.6 | 1336.3 | 1354.7 | 1391.4 | 1416.9 |
| 1419.3     | 1452.0 | 1465.0 | 1481.2 | 1488.5 | 1497.9 | 1504.3 | 1506.9 | 1511.8 |
| 1521.9     | 1538.7 | 2987.2 | 2995.7 | 3021.7 | 3023.9 | 3036.6 | 3060.8 | 3062.7 |
| 3076.2     | 3083.6 | 3095.2 | 3111.1 | 3115.9 | 3134.2 | 3142.5 | 3161.5 | 3801.7 |

|             |        |        |        |        |        |        |        |        |
|-------------|--------|--------|--------|--------|--------|--------|--------|--------|
| <b>TS7'</b> |        |        |        |        |        |        |        |        |
| -715.7      | 29.3   | 39.0   | 49.4   | 67.9   | 84.2   | 95.0   | 109.7  | 139.3  |
| 168.4       | 199.9  | 236.7  | 280.9  | 326.2  | 352.4  | 487.5  | 510.3  | 717.2  |
| 749.5       | 766.4  | 820.3  | 904.4  | 919.8  | 947.4  | 981.6  | 1030.6 | 1055.0 |
| 1075.9      | 1086.0 | 1110.6 | 1170.1 | 1182.8 | 1200.1 | 1203.4 | 1240.2 | 1257.8 |
| 1278.2      | 1285.5 | 1318.1 | 1321.7 | 1325.2 | 1332.4 | 1337.9 | 1384.3 | 1416.2 |
| 1417.3      | 1440.9 | 1464.3 | 1485.6 | 1497.9 | 1499.9 | 1506.0 | 1506.7 | 1511.9 |
| 1522.2      | 1538.7 | 2987.9 | 2996.6 | 3021.8 | 3025.2 | 3059.1 | 3060.8 | 3069.2 |
| 3076.2      | 3090.0 | 3093.8 | 3111.0 | 3118.2 | 3134.1 | 3142.4 | 3157.4 | 3807.2 |

### 3. Ketones

All frequencies are in  $\text{cm}^{-1}$ .

#### (1) $\text{CH}_3\text{C}(\text{O})\text{C}_2\text{H}_5$

|            |        |        |        |        |        |        |        |        |
|------------|--------|--------|--------|--------|--------|--------|--------|--------|
| <b>TS1</b> |        |        |        |        |        |        |        |        |
| -1463.0    | 33.6   | 83.8   | 148.1  | 210.2  | 256.4  | 278.7  | 366.1  | 429.7  |
| 479.6      | 586.0  | 709.4  | 752.5  | 819.8  | 901.1  | 951.1  | 1007.0 | 1014.6 |
| 1118.8     | 1124.6 | 1217.3 | 1229.7 | 1286.5 | 1381.1 | 1419.3 | 1433.9 | 1456.1 |
| 1481.5     | 1497.3 | 1504.4 | 1824.8 | 3054.8 | 3081.9 | 3086.6 | 3105.5 | 3157.5 |
| 3161.5     | 3180.8 | 3743.9 |        |        |        |        |        |        |

|            |        |        |        |        |        |        |        |        |
|------------|--------|--------|--------|--------|--------|--------|--------|--------|
| <b>TS2</b> |        |        |        |        |        |        |        |        |
| -621.1     | 40.8   | 51.5   | 72.5   | 104.0  | 143.7  | 203.1  | 251.7  | 404.9  |
| 478.2      | 590.3  | 657.5  | 778.8  | 782.5  | 951.1  | 974.0  | 1003.9 | 1091.6 |
| 1133.7     | 1153.9 | 1196.2 | 1286.0 | 1361.7 | 1399.3 | 1415.9 | 1472.6 | 1478.7 |
| 1487.1     | 1492.6 | 1546.6 | 1843.9 | 3067.6 | 3073.5 | 3094.9 | 3136.0 | 3142.5 |
| 3163.6     | 3186.4 | 3799.1 |        |        |        |        |        |        |

**TS3**

|         |        |        |        |        |        |        |        |        |
|---------|--------|--------|--------|--------|--------|--------|--------|--------|
| -1151.1 | 52.6   | 107.3  | 125.0  | 160.8  | 245.9  | 345.9  | 401.9  | 455.2  |
| 472.6   | 598.7  | 721.0  | 760.3  | 856.1  | 927.0  | 972.4  | 976.5  | 1036.4 |
| 1121.7  | 1137.3 | 1202.6 | 1257.9 | 1318.0 | 1379.7 | 1406.5 | 1439.4 | 1450.9 |
| 1463.7  | 1469.9 | 1482.0 | 1839.3 | 3047.1 | 3069.5 | 3081.9 | 3113.7 | 3137.6 |
| 3186.9  | 3187.5 | 3758.7 |        |        |        |        |        |        |

**TS3'**

|        |        |        |        |        |        |        |        |        |
|--------|--------|--------|--------|--------|--------|--------|--------|--------|
| -788.9 | 40.4   | 56.3   | 72.4   | 96.1   | 104.4  | 220.5  | 320.0  | 397.3  |
| 474.5  | 595.5  | 704.4  | 754.6  | 827.4  | 937.9  | 952.5  | 1017.4 | 1084.5 |
| 1132.4 | 1194.5 | 1224.7 | 1280.3 | 1316.3 | 1368.1 | 1394.5 | 1413.9 | 1459.4 |
| 1471.3 | 1480.1 | 1481.9 | 1848.0 | 3062.3 | 3070.3 | 3099.3 | 3116.5 | 3137.8 |
| 3184.5 | 3185.3 | 3806.6 |        |        |        |        |        |        |

**(2) CH<sub>3</sub>C(O)C<sub>3</sub>H<sub>7</sub>****TS1**

|         |        |        |        |        |        |        |        |        |
|---------|--------|--------|--------|--------|--------|--------|--------|--------|
| -1461.8 | 29.0   | 71.8   | 99.3   | 126.1  | 198.0  | 245.2  | 275.5  | 333.4  |
| 372.8   | 433.3  | 482.4  | 584.6  | 716.6  | 742.6  | 829.6  | 859.1  | 905.9  |
| 931.6   | 976.3  | 1017.1 | 1071.5 | 1134.8 | 1141.5 | 1211.1 | 1226.9 | 1258.4 |
| 1324.7  | 1331.2 | 1406.3 | 1418.7 | 1433.0 | 1453.4 | 1481.0 | 1494.6 | 1505.9 |
| 1511.3  | 1823.6 | 3041.7 | 3059.2 | 3072.8 | 3084.2 | 3104.9 | 3113.6 | 3136.1 |
| 3141.0  | 3180.0 | 3743.6 |        |        |        |        |        |        |

**TS2**

|        |        |        |        |        |        |        |        |        |
|--------|--------|--------|--------|--------|--------|--------|--------|--------|
| -598.1 | 45.5   | 57.2   | 79.5   | 108.8  | 117.6  | 144.0  | 173.1  | 259.3  |
| 345.4  | 400.8  | 475.8  | 599.0  | 655.4  | 749.6  | 842.9  | 854.4  | 929.5  |
| 970.6  | 989.7  | 1064.5 | 1117.3 | 1143.1 | 1176.0 | 1186.4 | 1241.3 | 1297.4 |
| 1320.7 | 1390.3 | 1408.7 | 1413.7 | 1472.9 | 1479.8 | 1484.0 | 1505.8 | 1509.8 |
| 1567.6 | 1842.5 | 3056.3 | 3066.8 | 3068.8 | 3079.2 | 3111.9 | 3132.4 | 3135.2 |
| 3141.8 | 3185.9 | 3795.6 |        |        |        |        |        |        |

**TS3**

|        |        |        |        |        |        |        |        |        |
|--------|--------|--------|--------|--------|--------|--------|--------|--------|
| -815.7 | 49.9   | 96.6   | 112.7  | 132.2  | 161.5  | 185.0  | 235.0  | 341.6  |
| 390.9  | 449.6  | 476.8  | 608.1  | 673.9  | 733.3  | 831.3  | 875.8  | 930.6  |
| 982.9  | 985.8  | 1069.6 | 1100.9 | 1142.7 | 1150.7 | 1197.0 | 1258.2 | 1305.9 |
| 1334.1 | 1388.1 | 1410.8 | 1414.4 | 1441.2 | 1455.7 | 1469.8 | 1481.1 | 1495.1 |
| 1503.0 | 1838.0 | 3037.4 | 3052.0 | 3068.8 | 3070.6 | 3108.3 | 3122.6 | 3136.8 |
| 3150.4 | 3186.4 | 3753.5 |        |        |        |        |        |        |

**TS4**

|        |        |        |        |        |        |        |        |        |
|--------|--------|--------|--------|--------|--------|--------|--------|--------|
| -716.5 | 35.9   | 59.7   | 84.4   | 101.3  | 107.7  | 130.8  | 176.9  | 329.2  |
| 351.5  | 400.5  | 478.3  | 604.8  | 673.5  | 745.6  | 836.8  | 861.2  | 919.1  |
| 966.9  | 983.5  | 1072.2 | 1111.7 | 1140.5 | 1184.0 | 1223.4 | 1291.2 | 1323.2 |
| 1331.1 | 1361.1 | 1390.2 | 1416.4 | 1445.3 | 1459.6 | 1472.1 | 1481.7 | 1485.8 |
| 1498.9 | 1847.7 | 3044.0 | 3068.7 | 3069.1 | 3085.9 | 3092.4 | 3118.9 | 3136.5 |
| 3163.5 | 3183.7 | 3804.7 |        |        |        |        |        |        |

**TS4'**

|        |       |       |       |       |       |       |       |       |
|--------|-------|-------|-------|-------|-------|-------|-------|-------|
| -853.1 | 37.2  | 63.0  | 80.4  | 84.3  | 98.1  | 112.2 | 178.3 | 318.2 |
| 352.2  | 396.7 | 477.8 | 602.8 | 697.2 | 730.4 | 829.3 | 850.7 | 950.1 |

|        |        |        |        |        |        |        |        |        |
|--------|--------|--------|--------|--------|--------|--------|--------|--------|
| 960.1  | 980.8  | 1069.5 | 1079.9 | 1141.7 | 1187.6 | 1241.3 | 1275.5 | 1319.4 |
| 1328.3 | 1348.2 | 1389.5 | 1406.6 | 1428.5 | 1456.3 | 1471.5 | 1476.8 | 1481.8 |
| 1501.2 | 1850.4 | 3046.5 | 3069.1 | 3077.7 | 3080.2 | 3090.6 | 3119.7 | 3136.8 |
| 3160.2 | 3184.7 | 3803.7 |        |        |        |        |        |        |

### (3) CH<sub>3</sub>C(O)C<sub>4</sub>H<sub>9</sub>

#### TS1

|         |        |        |        |        |        |        |        |        |
|---------|--------|--------|--------|--------|--------|--------|--------|--------|
| -1460.2 | 25.9   | 55.5   | 85.0   | 96.9   | 132.3  | 175.0  | 244.9  | 272.9  |
| 281.1   | 318.0  | 421.0  | 442.4  | 481.8  | 588.2  | 715.5  | 737.2  | 774.4  |
| 851.8   | 888.6  | 913.2  | 928.2  | 992.0  | 1010.5 | 1056.0 | 1091.0 | 1139.9 |
| 1143.9  | 1208.1 | 1224.5 | 1243.8 | 1293.3 | 1316.0 | 1331.2 | 1376.7 | 1414.0 |
| 1416.7  | 1433.7 | 1453.3 | 1481.2 | 1490.2 | 1499.0 | 1504.3 | 1513.4 | 1823.5 |
| 3041.9  | 3047.4 | 3060.9 | 3071.2 | 3073.0 | 3079.2 | 3105.0 | 3115.5 | 3132.1 |
| 3138.9  | 3180.2 | 3743.4 |        |        |        |        |        |        |

#### TS2

|        |        |        |        |        |        |        |        |        |
|--------|--------|--------|--------|--------|--------|--------|--------|--------|
| -599.3 | 44.5   | 53.4   | 67.4   | 87.6   | 111.3  | 122.4  | 126.9  | 182.2  |
| 244.3  | 300.9  | 318.9  | 459.1  | 476.7  | 597.9  | 656.8  | 736.7  | 790.8  |
| 857.0  | 904.5  | 915.6  | 969.4  | 1000.2 | 1051.3 | 1081.4 | 1126.7 | 1148.7 |
| 1174.6 | 1187.4 | 1233.9 | 1284.9 | 1289.4 | 1324.0 | 1368.4 | 1396.7 | 1412.4 |
| 1417.2 | 1473.0 | 1480.0 | 1481.2 | 1497.5 | 1504.8 | 1511.8 | 1567.4 | 1842.4 |
| 3042.1 | 3055.7 | 3062.1 | 3066.9 | 3076.5 | 3080.8 | 3113.2 | 3133.0 | 3135.3 |
| 3139.6 | 3185.8 | 3795.4 |        |        |        |        |        |        |

#### TS3

|        |        |        |        |        |        |        |        |        |
|--------|--------|--------|--------|--------|--------|--------|--------|--------|
| -774.0 | 50.2   | 64.4   | 102.7  | 112.9  | 120.3  | 146.1  | 162.0  | 249.8  |
| 298.3  | 320.7  | 431.3  | 461.6  | 484.2  | 608.1  | 681.9  | 734.2  | 784.9  |
| 844.3  | 899.8  | 927.3  | 983.7  | 1010.3 | 1053.3 | 1103.2 | 1112.7 | 1136.1 |
| 1169.2 | 1196.4 | 1240.3 | 1289.8 | 1301.0 | 1328.1 | 1371.3 | 1395.0 | 1411.9 |
| 1418.8 | 1433.8 | 1448.2 | 1469.3 | 1481.5 | 1486.2 | 1504.5 | 1510.4 | 1837.8 |
| 3034.7 | 3038.8 | 3063.6 | 3068.7 | 3070.6 | 3078.3 | 3101.4 | 3135.7 | 3136.6 |
| 3144.5 | 3186.4 | 3752.1 |        |        |        |        |        |        |

#### TS4

|        |        |        |        |        |        |        |        |        |
|--------|--------|--------|--------|--------|--------|--------|--------|--------|
| -526.7 | 31.4   | 54.5   | 61.2   | 90.8   | 97.5   | 114.1  | 130.0  | 135.9  |
| 234.5  | 301.6  | 320.1  | 460.1  | 479.3  | 603.7  | 635.0  | 739.9  | 796.4  |
| 848.1  | 892.1  | 910.8  | 969.6  | 998.3  | 1057.8 | 1090.4 | 1140.9 | 1145.2 |
| 1191.6 | 1199.7 | 1234.1 | 1287.4 | 1319.7 | 1361.9 | 1377.7 | 1393.3 | 1412.6 |
| 1418.8 | 1460.0 | 1472.4 | 1481.7 | 1484.1 | 1496.5 | 1500.2 | 1669.8 | 1847.4 |
| 3043.6 | 3056.0 | 3062.2 | 3068.7 | 3074.7 | 3084.8 | 3109.8 | 3124.5 | 3136.4 |
| 3143.7 | 3183.5 | 3801.1 |        |        |        |        |        |        |

#### TS5

|        |        |        |        |        |        |        |        |        |
|--------|--------|--------|--------|--------|--------|--------|--------|--------|
| -782.5 | 27.3   | 52.9   | 78.4   | 93.0   | 106.2  | 129.6  | 140.2  | 164.4  |
| 302.7  | 320.8  | 328.8  | 461.8  | 477.9  | 604.0  | 719.6  | 766.5  | 799.1  |
| 845.6  | 877.2  | 913.4  | 970.3  | 989.4  | 1050.2 | 1094.1 | 1111.4 | 1147.7 |
| 1174.6 | 1198.5 | 1234.5 | 1291.4 | 1304.6 | 1329.1 | 1350.5 | 1376.2 | 1396.0 |
| 1416.6 | 1450.1 | 1456.6 | 1471.6 | 1477.8 | 1481.6 | 1485.3 | 1504.0 | 1849.0 |
| 3034.3 | 3042.4 | 3068.5 | 3070.7 | 3076.0 | 3081.7 | 3095.0 | 3118.9 | 3136.2 |

|             |        |        |        |        |        |        |        |        |
|-------------|--------|--------|--------|--------|--------|--------|--------|--------|
| 3161.9      | 3183.7 | 3799.5 |        |        |        |        |        |        |
| <b>TS5'</b> |        |        |        |        |        |        |        |        |
| -709.7      | 32.6   | 42.8   | 47.8   | 82.9   | 93.1   | 110.0  | 129.3  | 130.4  |
| 283.9       | 315.6  | 338.3  | 454.3  | 476.1  | 603.5  | 710.1  | 724.0  | 776.8  |
| 847.2       | 891.4  | 947.1  | 989.7  | 1000.1 | 1048.7 | 1077.9 | 1107.7 | 1148.7 |
| 1185.7      | 1229.1 | 1245.7 | 1285.6 | 1309.2 | 1328.0 | 1333.2 | 1372.4 | 1392.7 |
| 1412.9      | 1437.8 | 1456.0 | 1472.0 | 1481.6 | 1484.5 | 1496.4 | 1506.9 | 1849.3 |
| 3043.9      | 3057.7 | 3068.8 | 3074.5 | 3075.9 | 3090.6 | 3092.7 | 3120.5 | 3136.3 |
| 3158.0      | 3183.8 | 3806.8 |        |        |        |        |        |        |

#### (4) CH<sub>3</sub>C(O)C<sub>5</sub>H<sub>11</sub>

|            |        |        |        |        |        |        |        |        |
|------------|--------|--------|--------|--------|--------|--------|--------|--------|
| <b>TS1</b> |        |        |        |        |        |        |        |        |
| -1458.6    | 24.7   | 53.1   | 61.9   | 78.5   | 123.1  | 138.7  | 155.7  | 240.9  |
| 249.3      | 266.4  | 276.7  | 401.0  | 423.7  | 447.1  | 481.7  | 594.9  | 716.0  |
| 734.0      | 750.7  | 820.3  | 854.7  | 904.6  | 922.3  | 942.2  | 998.5  | 1007.4 |
| 1051.3     | 1079.8 | 1091.0 | 1142.9 | 1147.7 | 1206.3 | 1221.2 | 1237.1 | 1273.2 |
| 1294.6     | 1330.0 | 1336.7 | 1345.2 | 1399.2 | 1415.6 | 1417.9 | 1433.6 | 1453.2 |
| 1481.1     | 1488.4 | 1492.8 | 1503.9 | 1505.7 | 1514.1 | 1823.4 | 3033.3 | 3042.2 |
| 3054.0     | 3059.1 | 3063.6 | 3072.5 | 3073.5 | 3091.6 | 3105.0 | 3117.2 | 3128.7 |
| 3137.3     | 3180.1 | 3743.5 |        |        |        |        |        |        |

|            |        |        |        |        |        |        |        |        |
|------------|--------|--------|--------|--------|--------|--------|--------|--------|
| <b>TS2</b> |        |        |        |        |        |        |        |        |
| -598.7     | 42.8   | 43.5   | 61.0   | 74.0   | 94.5   | 111.2  | 133.3  | 142.8  |
| 178.7      | 225.2  | 250.4  | 292.7  | 406.4  | 463.6  | 475.0  | 604.3  | 656.7  |
| 732.4      | 758.6  | 833.1  | 852.9  | 922.4  | 944.9  | 959.7  | 1009.2 | 1043.5 |
| 1069.0     | 1089.7 | 1130.2 | 1151.5 | 1175.5 | 1186.6 | 1225.9 | 1264.9 | 1273.5 |
| 1314.2     | 1333.4 | 1339.4 | 1387.6 | 1403.2 | 1413.3 | 1416.9 | 1472.8 | 1479.9 |
| 1480.5     | 1491.4 | 1501.3 | 1506.0 | 1513.3 | 1569.7 | 1842.2 | 3028.4 | 3053.5 |
| 3055.9     | 3058.9 | 3064.4 | 3066.9 | 3080.3 | 3092.7 | 3114.5 | 3128.2 | 3135.3 |
| 3137.6     | 3185.7 | 3795.1 |        |        |        |        |        |        |

|            |        |        |        |        |        |        |        |        |
|------------|--------|--------|--------|--------|--------|--------|--------|--------|
| <b>TS3</b> |        |        |        |        |        |        |        |        |
| -773.9     | 49.1   | 53.8   | 67.7   | 89.0   | 111.7  | 130.2  | 153.2  | 164.7  |
| 234.0      | 244.5  | 295.7  | 393.6  | 437.5  | 463.0  | 482.2  | 612.1  | 686.6  |
| 735.5      | 748.1  | 830.2  | 854.8  | 919.3  | 930.1  | 966.2  | 1022.2 | 1050.8 |
| 1082.6     | 1104.6 | 1110.5 | 1144.2 | 1169.3 | 1194.4 | 1230.1 | 1269.4 | 1284.5 |
| 1318.6     | 1336.4 | 1346.3 | 1387.2 | 1405.1 | 1412.4 | 1416.2 | 1434.1 | 1448.3 |
| 1469.6     | 1481.0 | 1482.0 | 1498.0 | 1505.2 | 1512.2 | 1837.7 | 3021.4 | 3038.5 |
| 3056.1     | 3058.6 | 3066.6 | 3068.7 | 3071.2 | 3096.4 | 3103.0 | 3128.4 | 3136.6 |
| 3137.8     | 3186.3 | 3752.0 |        |        |        |        |        |        |

|            |        |        |        |        |        |        |        |        |
|------------|--------|--------|--------|--------|--------|--------|--------|--------|
| <b>TS4</b> |        |        |        |        |        |        |        |        |
| -486.9     | 33.0   | 51.2   | 58.4   | 78.9   | 94.3   | 100.2  | 122.6  | 131.1  |
| 152.7      | 225.3  | 254.4  | 293.0  | 409.1  | 463.7  | 479.4  | 607.6  | 627.0  |
| 738.4      | 765.7  | 836.5  | 856.1  | 920.7  | 931.0  | 961.3  | 1007.6 | 1047.4 |
| 1083.1     | 1096.7 | 1146.3 | 1147.1 | 1188.8 | 1206.1 | 1228.5 | 1275.1 | 1295.3 |
| 1324.7     | 1333.1 | 1363.6 | 1387.0 | 1400.9 | 1412.2 | 1418.8 | 1460.1 | 1472.6 |
| 1481.1     | 1481.9 | 1490.9 | 1504.7 | 1509.5 | 1676.5 | 1847.6 | 3043.1 | 3045.7 |

|        |        |        |        |        |        |        |        |        |
|--------|--------|--------|--------|--------|--------|--------|--------|--------|
| 3057.3 | 3059.0 | 3064.1 | 3068.8 | 3081.8 | 3091.8 | 3111.3 | 3127.8 | 3136.4 |
| 3139.7 | 3183.4 | 3798.4 |        |        |        |        |        |        |

**TS5**

|        |        |        |        |        |        |        |        |        |
|--------|--------|--------|--------|--------|--------|--------|--------|--------|
| -539.1 | 27.1   | 47.8   | 70.9   | 78.1   | 103.3  | 106.0  | 128.0  | 137.1  |
| 166.8  | 224.6  | 241.9  | 294.5  | 402.1  | 464.6  | 478.0  | 610.3  | 636.6  |
| 725.3  | 777.0  | 843.6  | 848.7  | 926.6  | 934.6  | 959.7  | 1005.3 | 1050.6 |
| 1085.6 | 1095.3 | 1142.3 | 1150.0 | 1188.5 | 1219.0 | 1242.5 | 1267.6 | 1302.6 |
| 1322.2 | 1338.7 | 1340.4 | 1385.8 | 1401.0 | 1411.0 | 1417.8 | 1456.7 | 1471.9 |
| 1480.2 | 1482.1 | 1494.9 | 1499.6 | 1503.3 | 1585.4 | 1848.7 | 3026.5 | 3042.4 |
| 3054.5 | 3066.8 | 3068.5 | 3071.5 | 3075.7 | 3085.5 | 3117.5 | 3123.0 | 3136.2 |
| 3147.2 | 3183.8 | 3794.8 |        |        |        |        |        |        |

**TS6**

|        |        |        |        |        |        |        |        |        |
|--------|--------|--------|--------|--------|--------|--------|--------|--------|
| -769.2 | 23.9   | 39.3   | 58.0   | 72.3   | 81.9   | 99.5   | 106.6  | 137.6  |
| 153.2  | 231.0  | 293.7  | 328.8  | 411.9  | 467.4  | 476.6  | 610.5  | 714.8  |
| 727.7  | 786.7  | 812.5  | 845.1  | 905.3  | 927.4  | 956.7  | 996.1  | 1047.0 |
| 1080.7 | 1089.2 | 1128.8 | 1149.1 | 1176.6 | 1190.1 | 1266.8 | 1278.1 | 1307.7 |
| 1327.3 | 1334.3 | 1352.0 | 1358.3 | 1387.9 | 1406.9 | 1421.0 | 1451.6 | 1456.3 |
| 1472.3 | 1481.7 | 1484.3 | 1490.1 | 1495.6 | 1509.6 | 1848.6 | 3036.2 | 3042.0 |
| 3043.3 | 3068.0 | 3069.1 | 3073.8 | 3074.4 | 3087.0 | 3095.1 | 3115.9 | 3136.2 |
| 3158.9 | 3183.5 | 3805.7 |        |        |        |        |        |        |

**TS6'**

|        |        |        |        |        |        |        |        |        |
|--------|--------|--------|--------|--------|--------|--------|--------|--------|
| -720.7 | 25.6   | 33.1   | 46.9   | 59.2   | 60.9   | 93.0   | 106.7  | 130.3  |
| 137.8  | 215.7  | 289.2  | 329.2  | 403.8  | 459.2  | 476.3  | 609.8  | 721.2  |
| 723.3  | 753.3  | 823.1  | 848.7  | 926.2  | 953.6  | 970.7  | 1008.5 | 1038.4 |
| 1073.5 | 1085.4 | 1108.9 | 1151.5 | 1184.4 | 1210.9 | 1229.6 | 1264.9 | 1290.5 |
| 1320.7 | 1329.2 | 1332.5 | 1352.0 | 1386.2 | 1398.9 | 1416.1 | 1448.5 | 1456.1 |
| 1472.0 | 1481.6 | 1483.8 | 1493.0 | 1498.5 | 1509.7 | 1850.1 | 3036.3 | 3042.3 |
| 3064.6 | 3068.3 | 3068.7 | 3073.8 | 3074.5 | 3087.1 | 3105.1 | 3119.4 | 3136.1 |
| 3153.9 | 3183.6 | 3808.0 |        |        |        |        |        |        |

**(5) C<sub>2</sub>H<sub>5</sub>C(O)C<sub>4</sub>H<sub>9</sub>****TS1'**

|        |        |        |        |        |        |        |        |        |
|--------|--------|--------|--------|--------|--------|--------|--------|--------|
| -778.0 | 24.9   | 42.0   | 49.1   | 51.5   | 77.3   | 92.3   | 113.0  | 126.0  |
| 222.8  | 246.0  | 289.3  | 311.3  | 343.7  | 465.1  | 476.1  | 647.9  | 703.2  |
| 730.4  | 748.9  | 813.5  | 867.9  | 917.1  | 923.4  | 989.1  | 1015.9 | 1042.8 |
| 1063.4 | 1092.7 | 1111.8 | 1149.7 | 1156.0 | 1222.3 | 1236.5 | 1277.9 | 1284.7 |
| 1313.4 | 1323.7 | 1331.6 | 1357.9 | 1384.6 | 1412.7 | 1416.2 | 1421.8 | 1453.2 |
| 1464.3 | 1481.8 | 1490.4 | 1499.2 | 1504.8 | 1513.4 | 1842.0 | 3042.8 | 3046.7 |
| 3060.1 | 3064.1 | 3069.9 | 3074.4 | 3078.8 | 3102.5 | 3114.5 | 3115.9 | 3131.2 |
| 3137.6 | 3184.8 | 3806.5 |        |        |        |        |        |        |

**TS1**

|         |        |        |        |        |        |        |        |        |
|---------|--------|--------|--------|--------|--------|--------|--------|--------|
| -1149.7 | 32.8   | 40.2   | 81.0   | 92.6   | 122.3  | 133.1  | 159.8  | 239.1  |
| 247.0   | 306.5  | 329.6  | 350.3  | 445.7  | 466.6  | 478.4  | 646.2  | 695.9  |
| 739.1   | 779.0  | 821.9  | 885.0  | 916.7  | 927.6  | 951.8  | 1008.2 | 1034.9 |
| 1056.3  | 1069.1 | 1092.9 | 1141.6 | 1150.7 | 1157.4 | 1227.3 | 1264.5 | 1284.5 |

|        |        |        |        |        |        |        |        |        |
|--------|--------|--------|--------|--------|--------|--------|--------|--------|
| 1313.8 | 1322.6 | 1331.8 | 1365.4 | 1396.5 | 1416.5 | 1422.6 | 1439.3 | 1448.8 |
| 1456.4 | 1464.2 | 1490.5 | 1499.3 | 1505.1 | 1513.5 | 1832.5 | 3040.3 | 3046.7 |
| 3050.6 | 3060.7 | 3069.9 | 3073.1 | 3078.5 | 3085.0 | 3112.7 | 3115.0 | 3131.8 |
| 3138.6 | 3186.1 | 3757.2 |        |        |        |        |        |        |

**TS2**

|        |        |        |        |        |        |        |        |        |
|--------|--------|--------|--------|--------|--------|--------|--------|--------|
| -610.2 | 28.2   | 41.1   | 61.4   | 77.2   | 87.8   | 106.3  | 123.3  | 138.4  |
| 201.6  | 243.2  | 246.6  | 303.9  | 332.2  | 471.1  | 479.0  | 622.6  | 669.7  |
| 730.3  | 767.2  | 810.9  | 839.1  | 921.5  | 924.7  | 996.6  | 1029.0 | 1049.3 |
| 1063.5 | 1092.5 | 1109.2 | 1148.1 | 1156.6 | 1163.6 | 1232.0 | 1276.5 | 1287.3 |
| 1320.6 | 1331.6 | 1354.8 | 1387.6 | 1415.2 | 1415.5 | 1421.9 | 1459.7 | 1486.4 |
| 1490.4 | 1493.5 | 1499.3 | 1504.7 | 1513.4 | 1551.1 | 1837.3 | 3042.4 | 3046.8 |
| 3059.5 | 3069.9 | 3073.0 | 3074.5 | 3079.6 | 3097.8 | 3113.0 | 3130.6 | 3136.7 |
| 3141.6 | 3163.4 | 3799.2 |        |        |        |        |        |        |

**TS3**

|        |        |        |        |        |        |        |        |        |
|--------|--------|--------|--------|--------|--------|--------|--------|--------|
| -594.7 | 33.0   | 48.4   | 53.4   | 68.4   | 94.1   | 100.8  | 130.0  | 172.2  |
| 212.8  | 242.0  | 248.1  | 303.9  | 331.5  | 465.6  | 477.8  | 621.6  | 665.5  |
| 737.2  | 769.7  | 814.7  | 848.9  | 920.6  | 924.6  | 997.1  | 1027.5 | 1039.8 |
| 1067.0 | 1085.7 | 1122.6 | 1146.8 | 1157.0 | 1177.4 | 1221.3 | 1275.6 | 1280.2 |
| 1298.6 | 1323.9 | 1360.8 | 1393.5 | 1412.8 | 1416.6 | 1420.5 | 1461.9 | 1480.8 |
| 1497.7 | 1498.0 | 1504.4 | 1505.0 | 1512.1 | 1569.1 | 1837.4 | 3042.2 | 3054.8 |
| 3055.4 | 3061.8 | 3077.0 | 3079.9 | 3081.8 | 3090.3 | 3113.4 | 3132.8 | 3139.3 |
| 3155.6 | 3157.1 | 3795.3 |        |        |        |        |        |        |

**TS4**

|        |        |        |        |        |        |        |        |        |
|--------|--------|--------|--------|--------|--------|--------|--------|--------|
| -780.2 | 39.2   | 51.1   | 74.1   | 103.4  | 114.8  | 137.4  | 149.0  | 212.2  |
| 247.4  | 251.7  | 303.4  | 338.2  | 441.9  | 464.9  | 486.7  | 661.0  | 687.6  |
| 705.7  | 765.9  | 813.0  | 842.9  | 919.6  | 952.3  | 1002.8 | 1033.2 | 1039.6 |
| 1067.6 | 1108.5 | 1116.0 | 1135.4 | 1154.3 | 1173.4 | 1233.4 | 1280.0 | 1292.8 |
| 1304.2 | 1329.0 | 1360.2 | 1391.6 | 1409.6 | 1418.2 | 1420.4 | 1430.3 | 1445.9 |
| 1458.9 | 1485.9 | 1498.3 | 1504.6 | 1505.4 | 1510.4 | 1832.7 | 3034.9 | 3039.6 |
| 3054.6 | 3063.5 | 3071.9 | 3078.2 | 3080.9 | 3088.3 | 3100.3 | 3135.5 | 3144.4 |
| 3155.0 | 3161.2 | 3748.7 |        |        |        |        |        |        |

**TS5**

|        |        |        |        |        |        |        |        |        |
|--------|--------|--------|--------|--------|--------|--------|--------|--------|
| -676.3 | 8.1    | 43.9   | 57.5   | 84.5   | 107.0  | 115.9  | 127.9  | 140.2  |
| 209.7  | 227.8  | 249.2  | 307.4  | 337.7  | 469.7  | 479.2  | 613.0  | 656.1  |
| 706.9  | 775.4  | 827.3  | 843.6  | 921.5  | 926.8  | 1005.7 | 1020.7 | 1029.6 |
| 1069.6 | 1091.3 | 1130.2 | 1136.7 | 1156.4 | 1209.8 | 1239.8 | 1280.5 | 1283.8 |
| 1326.5 | 1359.2 | 1387.8 | 1410.8 | 1415.7 | 1418.6 | 1422.6 | 1453.9 | 1467.4 |
| 1485.6 | 1496.9 | 1497.5 | 1500.5 | 1504.8 | 1653.4 | 1842.1 | 3047.0 | 3054.0 |
| 3058.6 | 3061.3 | 3073.2 | 3079.6 | 3081.4 | 3091.6 | 3106.2 | 3118.9 | 3141.5 |
| 3154.6 | 3157.5 | 3799.5 |        |        |        |        |        |        |

**TS6**

|        |        |        |        |        |        |        |        |        |
|--------|--------|--------|--------|--------|--------|--------|--------|--------|
| -781.6 | 24.7   | 41.8   | 60.5   | 76.7   | 96.0   | 119.2  | 147.0  | 177.4  |
| 209.1  | 245.5  | 305.5  | 328.9  | 337.3  | 467.4  | 479.9  | 656.9  | 705.4  |
| 740.2  | 795.6  | 814.5  | 841.8  | 894.2  | 930.9  | 1005.2 | 1025.4 | 1030.2 |
| 1058.8 | 1094.3 | 1118.4 | 1136.8 | 1155.6 | 1185.2 | 1230.2 | 1280.2 | 1287.4 |

|        |        |        |        |        |        |        |        |        |
|--------|--------|--------|--------|--------|--------|--------|--------|--------|
| 1308.9 | 1331.8 | 1350.9 | 1365.0 | 1394.5 | 1416.7 | 1420.0 | 1451.1 | 1454.0 |
| 1465.6 | 1478.2 | 1485.8 | 1497.0 | 1504.2 | 1505.0 | 1844.4 | 3034.2 | 3043.0 |
| 3056.5 | 3070.7 | 3076.9 | 3079.8 | 3081.6 | 3090.0 | 3095.0 | 3118.8 | 3153.8 |
| 3159.3 | 3161.7 | 3799.6 |        |        |        |        |        |        |

**TS6'**

|        |        |        |        |        |        |        |        |        |
|--------|--------|--------|--------|--------|--------|--------|--------|--------|
| -707.3 | 28.0   | 36.7   | 42.9   | 55.6   | 82.3   | 110.2  | 113.3  | 122.5  |
| 213.4  | 239.2  | 291.1  | 327.1  | 343.6  | 466.3  | 472.3  | 655.0  | 703.7  |
| 709.8  | 751.3  | 816.2  | 845.5  | 916.2  | 977.1  | 1005.9 | 1029.2 | 1034.0 |
| 1054.5 | 1079.8 | 1115.7 | 1139.4 | 1153.8 | 1224.9 | 1242.5 | 1278.9 | 1285.3 |
| 1313.6 | 1328.5 | 1333.7 | 1363.4 | 1388.9 | 1413.5 | 1419.7 | 1438.4 | 1452.9 |
| 1465.8 | 1484.8 | 1496.7 | 1497.8 | 1505.2 | 1507.0 | 1844.8 | 3044.6 | 3057.4 |
| 3057.7 | 3074.5 | 3076.4 | 3080.0 | 3090.0 | 3090.5 | 3093.2 | 3120.6 | 3154.4 |
| 3157.8 | 3159.0 | 3806.9 |        |        |        |        |        |        |

**(6) C<sub>3</sub>H<sub>7</sub>C(O)C<sub>3</sub>H<sub>7</sub>**

**TS1'**

|        |        |        |        |        |        |        |        |        |
|--------|--------|--------|--------|--------|--------|--------|--------|--------|
| -847.6 | 25.0   | 43.6   | 56.3   | 83.5   | 89.5   | 98.1   | 106.7  | 123.8  |
| 225.9  | 249.9  | 293.1  | 347.8  | 358.5  | 410.1  | 472.6  | 686.1  | 699.7  |
| 706.4  | 752.3  | 821.1  | 886.3  | 898.7  | 918.2  | 957.7  | 1021.8 | 1039.2 |
| 1069.8 | 1077.7 | 1100.0 | 1151.8 | 1154.4 | 1230.8 | 1262.5 | 1271.9 | 1313.3 |
| 1318.1 | 1327.8 | 1335.0 | 1352.7 | 1396.2 | 1414.8 | 1419.0 | 1429.9 | 1451.5 |
| 1463.2 | 1477.3 | 1495.0 | 1501.5 | 1507.0 | 1511.8 | 1844.3 | 3040.6 | 3049.6 |
| 3058.1 | 3072.4 | 3077.6 | 3082.7 | 3084.6 | 3090.4 | 3112.1 | 3119.6 | 3134.8 |
| 3139.4 | 3160.0 | 3803.7 |        |        |        |        |        |        |

**TS1**

|        |        |        |        |        |        |        |        |        |
|--------|--------|--------|--------|--------|--------|--------|--------|--------|
| -780.7 | 13.5   | 39.8   | 57.7   | 81.9   | 103.7  | 113.5  | 120.6  | 139.9  |
| 231.1  | 246.9  | 306.2  | 331.6  | 371.8  | 417.9  | 473.6  | 686.1  | 696.9  |
| 724.6  | 783.6  | 815.8  | 874.3  | 891.7  | 905.1  | 945.6  | 1013.2 | 1045.9 |
| 1067.6 | 1073.2 | 1121.7 | 1151.3 | 1157.2 | 1200.5 | 1256.9 | 1299.2 | 1310.3 |
| 1329.1 | 1332.3 | 1350.0 | 1370.5 | 1402.2 | 1417.8 | 1421.9 | 1447.1 | 1452.7 |
| 1466.1 | 1487.6 | 1494.6 | 1495.0 | 1506.2 | 1511.8 | 1841.1 | 3041.9 | 3050.6 |
| 3057.6 | 3068.6 | 3073.6 | 3082.6 | 3086.5 | 3090.3 | 3111.3 | 3115.1 | 3134.1 |
| 3137.9 | 3160.8 | 3804.2 |        |        |        |        |        |        |

**TS2**

|        |        |        |        |        |        |        |        |        |
|--------|--------|--------|--------|--------|--------|--------|--------|--------|
| -817.9 | 33.8   | 53.4   | 86.7   | 97.5   | 127.3  | 130.3  | 159.0  | 231.9  |
| 236.2  | 247.8  | 305.0  | 367.4  | 404.9  | 455.5  | 473.0  | 672.6  | 696.8  |
| 711.1  | 755.7  | 829.8  | 891.8  | 906.4  | 917.2  | 951.9  | 1030.8 | 1050.5 |
| 1073.6 | 1087.7 | 1113.4 | 1149.3 | 1155.0 | 1159.6 | 1237.5 | 1272.5 | 1303.3 |
| 1311.4 | 1328.3 | 1344.6 | 1395.0 | 1413.2 | 1417.5 | 1421.1 | 1440.5 | 1449.5 |
| 1458.0 | 1495.0 | 1495.1 | 1502.4 | 1506.6 | 1511.6 | 1831.3 | 3036.5 | 3043.2 |
| 3052.0 | 3058.6 | 3069.3 | 3076.8 | 3082.6 | 3107.1 | 3112.8 | 3122.3 | 3135.2 |
| 3140.4 | 3149.9 | 3750.1 |        |        |        |        |        |        |

**TS3**

|        |       |       |       |       |       |       |       |       |
|--------|-------|-------|-------|-------|-------|-------|-------|-------|
| -593.2 | 28.8  | 43.0  | 54.3  | 86.7  | 92.9  | 109.4 | 120.3 | 139.0 |
| 224.3  | 246.4 | 260.3 | 306.8 | 363.9 | 415.1 | 470.1 | 627.9 | 697.7 |

|        |        |        |        |        |        |        |        |        |
|--------|--------|--------|--------|--------|--------|--------|--------|--------|
| 744.2  | 756.2  | 839.4  | 883.6  | 897.9  | 899.3  | 950.0  | 1037.5 | 1053.0 |
| 1065.1 | 1075.0 | 1134.8 | 1145.9 | 1158.4 | 1180.1 | 1222.1 | 1265.7 | 1288.4 |
| 1305.7 | 1328.8 | 1338.1 | 1398.5 | 1413.9 | 1416.3 | 1420.5 | 1459.1 | 1484.4 |
| 1494.7 | 1505.7 | 1506.1 | 1510.1 | 1511.7 | 1574.0 | 1836.1 | 3041.5 | 3056.2 |
| 3057.9 | 3068.3 | 3074.0 | 3081.7 | 3082.5 | 3111.5 | 3112.1 | 3132.6 | 3134.0 |
| 3138.4 | 3141.4 | 3795.7 |        |        |        |        |        |        |

#### 4. Aldehydes

All frequencies are in  $\text{cm}^{-1}$ .

##### (1) $\text{C}_3\text{H}_7\text{CHO}$

###### TS1

|        |        |        |        |        |        |        |        |        |
|--------|--------|--------|--------|--------|--------|--------|--------|--------|
| -436.3 | 20.6   | 45.1   | 81.7   | 120.1  | 161.5  | 195.3  | 245.2  | 348.5  |
| 546.6  | 659.9  | 712.1  | 780.3  | 874.3  | 920.6  | 975.0  | 1066.3 | 1130.8 |
| 1139.1 | 1244.4 | 1276.1 | 1319.2 | 1324.3 | 1400.7 | 1419.1 | 1449.3 | 1495.7 |
| 1505.7 | 1511.5 | 1874.4 | 2209.9 | 3051.1 | 3060.8 | 3080.8 | 3081.2 | 3113.1 |
| 3135.8 | 3141.4 | 3791.5 |        |        |        |        |        |        |

###### TS2

|        |        |        |        |        |        |        |        |        |
|--------|--------|--------|--------|--------|--------|--------|--------|--------|
| -675.1 | 66.4   | 82.5   | 87.8   | 139.5  | 195.2  | 209.0  | 266.7  | 354.7  |
| 581.4  | 701.4  | 755.9  | 825.3  | 866.3  | 953.2  | 970.2  | 1066.3 | 1120.4 |
| 1138.1 | 1159.5 | 1214.1 | 1288.4 | 1310.9 | 1401.8 | 1414.2 | 1422.8 | 1483.9 |
| 1505.5 | 1507.9 | 1525.2 | 1849.1 | 2970.0 | 3058.3 | 3067.4 | 3079.3 | 3113.1 |
| 3133.9 | 3143.8 | 3794.4 |        |        |        |        |        |        |

###### TS3

|        |        |        |        |        |        |        |        |        |
|--------|--------|--------|--------|--------|--------|--------|--------|--------|
| -803.9 | 74.9   | 135.3  | 152.6  | 167.6  | 213.4  | 235.6  | 343.1  | 419.0  |
| 659.4  | 664.5  | 711.6  | 820.9  | 884.0  | 956.4  | 984.2  | 1053.0 | 1104.1 |
| 1144.3 | 1160.1 | 1259.9 | 1302.9 | 1319.7 | 1400.8 | 1414.6 | 1421.9 | 1440.3 |
| 1471.8 | 1494.9 | 1504.4 | 1852.8 | 2966.2 | 3035.1 | 3052.9 | 3066.7 | 3109.8 |
| 3123.9 | 3151.7 | 3764.1 |        |        |        |        |        |        |

###### TS4

|        |        |        |        |        |        |        |        |        |
|--------|--------|--------|--------|--------|--------|--------|--------|--------|
| -737.8 | 44.9   | 82.2   | 104.5  | 131.6  | 179.0  | 198.2  | 330.0  | 357.6  |
| 662.3  | 691.5  | 707.1  | 824.9  | 862.3  | 956.5  | 969.1  | 1067.0 | 1110.4 |
| 1153.3 | 1218.6 | 1285.1 | 1319.8 | 1326.2 | 1359.9 | 1409.8 | 1422.4 | 1441.0 |
| 1458.4 | 1485.6 | 1491.7 | 1861.4 | 2946.3 | 3043.1 | 3065.8 | 3079.6 | 3093.4 |
| 3119.3 | 3165.2 | 3804.5 |        |        |        |        |        |        |

###### TS4'

|        |        |        |        |        |        |        |        |        |
|--------|--------|--------|--------|--------|--------|--------|--------|--------|
| -863.3 | 55.6   | 66.6   | 77.1   | 91.0   | 179.5  | 207.0  | 315.7  | 352.4  |
| 673.1  | 690.4  | 705.6  | 792.7  | 900.7  | 950.2  | 963.7  | 1070.6 | 1077.8 |
| 1156.0 | 1242.7 | 1265.1 | 1313.8 | 1326.5 | 1339.1 | 1399.6 | 1416.4 | 1426.0 |
| 1455.3 | 1476.1 | 1500.5 | 1863.7 | 2947.8 | 3045.1 | 3075.0 | 3077.8 | 3091.4 |
| 3119.1 | 3161.4 | 3803.9 |        |        |        |        |        |        |

##### (2) $\text{C}_4\text{H}_9\text{CHO}$

###### TS1

|        |      |      |      |       |       |       |       |       |
|--------|------|------|------|-------|-------|-------|-------|-------|
| -427.8 | 17.4 | 38.6 | 72.0 | 104.4 | 123.1 | 137.3 | 167.4 | 246.2 |
|--------|------|------|------|-------|-------|-------|-------|-------|

|        |        |        |        |        |        |        |        |        |
|--------|--------|--------|--------|--------|--------|--------|--------|--------|
| 295.7  | 398.3  | 547.9  | 661.1  | 705.8  | 744.3  | 842.1  | 912.5  | 932.9  |
| 961.8  | 1052.3 | 1086.9 | 1137.4 | 1142.8 | 1230.9 | 1262.4 | 1294.7 | 1310.6 |
| 1331.8 | 1370.1 | 1411.1 | 1417.2 | 1449.5 | 1491.3 | 1499.4 | 1504.9 | 1513.6 |
| 1874.6 | 2213.7 | 3049.8 | 3051.4 | 3060.8 | 3069.5 | 3077.7 | 3084.0 | 3112.8 |
| 3132.0 | 3139.1 | 3791.6 |        |        |        |        |        |        |

### TS2

|        |        |        |        |        |        |        |        |        |
|--------|--------|--------|--------|--------|--------|--------|--------|--------|
| -683.6 | 59.0   | 73.2   | 80.2   | 106.0  | 124.3  | 145.9  | 226.0  | 249.4  |
| 298.7  | 400.9  | 579.7  | 697.0  | 740.4  | 787.1  | 875.9  | 903.6  | 928.4  |
| 979.4  | 1055.7 | 1087.0 | 1111.1 | 1144.3 | 1164.6 | 1212.8 | 1268.6 | 1283.9 |
| 1325.5 | 1368.1 | 1409.9 | 1417.9 | 1422.4 | 1480.6 | 1498.6 | 1505.5 | 1512.6 |
| 1519.7 | 1848.7 | 2970.1 | 3044.1 | 3054.3 | 3062.4 | 3079.3 | 3083.0 | 3112.3 |
| 3133.6 | 3140.5 | 3794.1 |        |        |        |        |        |        |

### TS3

|        |        |        |        |        |        |        |        |        |
|--------|--------|--------|--------|--------|--------|--------|--------|--------|
| -759.0 | 59.0   | 93.8   | 121.1  | 137.9  | 167.6  | 173.9  | 251.9  | 296.2  |
| 399.7  | 411.3  | 657.8  | 669.4  | 707.1  | 778.4  | 861.3  | 912.8  | 943.8  |
| 1000.5 | 1053.5 | 1091.6 | 1114.7 | 1140.6 | 1172.5 | 1241.6 | 1286.8 | 1290.9 |
| 1324.2 | 1369.1 | 1408.9 | 1418.5 | 1422.6 | 1438.6 | 1461.7 | 1485.9 | 1504.8 |
| 1510.4 | 1852.6 | 2965.7 | 3034.9 | 3037.5 | 3064.1 | 3067.0 | 3079.4 | 3103.0 |
| 3136.3 | 3145.2 | 3762.2 |        |        |        |        |        |        |

### TS4

|        |        |        |        |        |        |        |        |        |
|--------|--------|--------|--------|--------|--------|--------|--------|--------|
| -537.4 | 37.7   | 66.6   | 84.6   | 105.9  | 125.7  | 143.7  | 179.8  | 236.6  |
| 300.0  | 399.3  | 633.7  | 674.0  | 698.5  | 791.9  | 856.3  | 908.5  | 929.3  |
| 982.4  | 1059.5 | 1084.8 | 1145.4 | 1157.0 | 1195.6 | 1235.7 | 1277.3 | 1317.5 |
| 1359.4 | 1379.3 | 1412.4 | 1414.0 | 1422.7 | 1458.8 | 1483.8 | 1496.5 | 1500.0 |
| 1655.1 | 1861.2 | 2944.5 | 3042.3 | 3056.0 | 3059.9 | 3074.6 | 3079.2 | 3109.4 |
| 3124.9 | 3144.9 | 3800.8 |        |        |        |        |        |        |

### TS5

|        |        |        |        |        |        |        |        |        |
|--------|--------|--------|--------|--------|--------|--------|--------|--------|
| -788.0 | 39.0   | 67.7   | 102.7  | 133.9  | 144.3  | 162.4  | 186.0  | 299.0  |
| 328.3  | 404.5  | 673.3  | 695.3  | 737.5  | 797.7  | 851.9  | 906.0  | 925.7  |
| 974.7  | 1050.3 | 1092.0 | 1111.5 | 1159.3 | 1188.8 | 1238.0 | 1284.3 | 1302.4 |
| 1326.5 | 1348.6 | 1376.1 | 1413.5 | 1422.2 | 1446.5 | 1456.8 | 1476.9 | 1484.5 |
| 1504.1 | 1862.6 | 2945.1 | 3035.4 | 3041.0 | 3067.7 | 3072.4 | 3082.8 | 3095.6 |
| 3118.3 | 3162.6 | 3799.8 |        |        |        |        |        |        |

### TS5'

|        |        |        |        |        |        |        |        |        |
|--------|--------|--------|--------|--------|--------|--------|--------|--------|
| -724.2 | 32.5   | 45.1   | 64.0   | 98.3   | 113.9  | 138.0  | 178.6  | 303.4  |
| 323.5  | 385.9  | 670.1  | 684.6  | 724.5  | 752.8  | 859.4  | 912.0  | 970.1  |
| 994.3  | 1047.1 | 1077.0 | 1106.7 | 1163.2 | 1227.9 | 1244.3 | 1278.3 | 1306.9 |
| 1327.8 | 1329.2 | 1371.3 | 1408.0 | 1422.4 | 1432.8 | 1454.9 | 1482.5 | 1494.4 |
| 1506.2 | 1863.1 | 2943.6 | 3041.9 | 3058.5 | 3071.0 | 3074.2 | 3091.1 | 3093.1 |
| 3119.1 | 3158.8 | 3806.5 |        |        |        |        |        |        |

## (3) C<sub>5</sub>H<sub>11</sub>CHO

### TS1

|        |       |       |       |       |       |       |       |       |
|--------|-------|-------|-------|-------|-------|-------|-------|-------|
| -421.9 | 18.6  | 36.3  | 52.7  | 96.7  | 108.7 | 128.5 | 140.7 | 171.6 |
| 222.3  | 248.1 | 364.3 | 417.6 | 550.7 | 661.8 | 716.0 | 732.9 | 786.6 |

|        |        |        |        |        |        |        |        |        |
|--------|--------|--------|--------|--------|--------|--------|--------|--------|
| 881.7  | 906.6  | 934.0  | 987.2  | 1045.7 | 1073.2 | 1090.1 | 1140.4 | 1146.2 |
| 1222.8 | 1251.4 | 1278.7 | 1291.3 | 1328.0 | 1334.9 | 1338.1 | 1393.4 | 1413.8 |
| 1416.5 | 1449.4 | 1488.5 | 1492.5 | 1503.8 | 1505.5 | 1513.9 | 1874.5 | 2216.5 |
| 3035.7 | 3051.4 | 3053.6 | 3059.2 | 3065.7 | 3069.8 | 3080.9 | 3091.6 | 3114.1 |
| 3129.0 | 3137.2 | 3791.8 |        |        |        |        |        |        |

**TS2**

|        |        |        |        |        |        |        |        |        |
|--------|--------|--------|--------|--------|--------|--------|--------|--------|
| -682.2 | 43.9   | 66.5   | 73.1   | 96.7   | 114.1  | 133.3  | 149.4  | 223.2  |
| 226.4  | 249.4  | 368.2  | 418.9  | 582.1  | 707.5  | 734.5  | 763.2  | 817.0  |
| 894.5  | 915.2  | 928.3  | 997.8  | 1046.2 | 1076.5 | 1089.5 | 1111.8 | 1148.1 |
| 1166.5 | 1212.1 | 1251.5 | 1262.8 | 1313.0 | 1332.7 | 1336.5 | 1394.1 | 1412.1 |
| 1415.9 | 1422.8 | 1480.0 | 1491.8 | 1501.3 | 1505.6 | 1513.2 | 1520.8 | 1848.7 |
| 2970.0 | 3030.4 | 3052.8 | 3055.7 | 3059.1 | 3067.8 | 3080.8 | 3093.1 | 3113.4 |
| 3128.6 | 3138.0 | 3793.9 |        |        |        |        |        |        |

**TS3**

|        |        |        |        |        |        |        |        |        |
|--------|--------|--------|--------|--------|--------|--------|--------|--------|
| -756.3 | 51.2   | 69.4   | 90.9   | 112.4  | 151.5  | 166.1  | 175.7  | 235.2  |
| 246.7  | 366.5  | 409.4  | 414.8  | 658.1  | 672.5  | 717.4  | 750.2  | 826.1  |
| 893.2  | 906.8  | 929.6  | 1015.8 | 1051.1 | 1080.9 | 1093.4 | 1114.7 | 1146.0 |
| 1173.8 | 1231.7 | 1266.0 | 1279.6 | 1316.1 | 1334.2 | 1340.5 | 1396.4 | 1412.1 |
| 1416.6 | 1422.5 | 1438.8 | 1462.2 | 1481.7 | 1498.0 | 1505.9 | 1512.2 | 1852.5 |
| 2965.4 | 3022.2 | 3036.5 | 3056.4 | 3059.2 | 3066.6 | 3068.3 | 3096.9 | 3104.2 |
| 3128.9 | 3138.6 | 3761.9 |        |        |        |        |        |        |

**TS4**

|        |        |        |        |        |        |        |        |        |
|--------|--------|--------|--------|--------|--------|--------|--------|--------|
| -496.7 | 41.0   | 59.2   | 67.2   | 106.7  | 107.4  | 130.3  | 151.3  | 183.4  |
| 223.3  | 254.8  | 367.4  | 420.8  | 623.2  | 673.2  | 710.7  | 763.8  | 817.8  |
| 902.3  | 909.9  | 930.1  | 999.1  | 1048.3 | 1082.7 | 1095.2 | 1149.8 | 1159.8 |
| 1202.1 | 1229.0 | 1266.9 | 1294.1 | 1322.8 | 1330.1 | 1365.5 | 1393.9 | 1411.8 |
| 1415.3 | 1422.7 | 1458.6 | 1481.2 | 1490.7 | 1504.8 | 1509.6 | 1661.6 | 1861.4 |
| 2944.5 | 3041.7 | 3045.4 | 3057.9 | 3060.2 | 3061.4 | 3075.6 | 3091.9 | 3110.9 |
| 3128.2 | 3140.4 | 3797.9 |        |        |        |        |        |        |

**TS5**

|        |        |        |        |        |        |        |        |        |
|--------|--------|--------|--------|--------|--------|--------|--------|--------|
| -544.6 | 33.8   | 61.5   | 81.6   | 110.6  | 118.9  | 133.2  | 165.4  | 180.8  |
| 223.2  | 241.0  | 368.8  | 415.6  | 639.9  | 671.8  | 709.3  | 754.4  | 831.7  |
| 902.4  | 913.2  | 933.0  | 995.9  | 1052.6 | 1082.1 | 1095.2 | 1145.7 | 1162.3 |
| 1222.0 | 1240.4 | 1259.8 | 1301.2 | 1324.7 | 1333.0 | 1344.2 | 1391.6 | 1411.3 |
| 1415.6 | 1422.2 | 1455.6 | 1480.5 | 1494.9 | 1499.8 | 1503.5 | 1575.5 | 1862.4 |
| 2944.3 | 3027.7 | 3040.8 | 3054.8 | 3066.2 | 3070.3 | 3071.9 | 3085.8 | 3116.8 |
| 3123.4 | 3147.8 | 3795.1 |        |        |        |        |        |        |

**TS6**

|        |        |        |        |        |        |        |        |        |
|--------|--------|--------|--------|--------|--------|--------|--------|--------|
| -803.8 | 41.0   | 50.8   | 56.3   | 73.8   | 119.6  | 122.7  | 134.2  | 181.3  |
| 208.5  | 338.0  | 371.7  | 396.5  | 670.4  | 701.8  | 726.9  | 740.6  | 798.6  |
| 904.4  | 910.6  | 937.7  | 1002.1 | 1033.5 | 1063.0 | 1085.5 | 1110.3 | 1165.1 |
| 1221.4 | 1245.9 | 1281.0 | 1305.7 | 1320.6 | 1330.7 | 1335.4 | 1359.1 | 1394.9 |
| 1413.7 | 1421.8 | 1434.4 | 1455.7 | 1476.7 | 1490.6 | 1495.6 | 1509.8 | 1863.5 |
| 2943.1 | 3038.6 | 3040.8 | 3053.6 | 3068.7 | 3071.8 | 3072.7 | 3089.0 | 3098.3 |
| 3116.7 | 3158.0 | 3805.6 |        |        |        |        |        |        |

**TS6'**

|        |        |        |        |        |        |        |        |        |
|--------|--------|--------|--------|--------|--------|--------|--------|--------|
| -771.2 | 32.6   | 53.1   | 78.8   | 92.6   | 110.3  | 120.5  | 153.5  | 180.0  |
| 228.2  | 329.2  | 368.5  | 426.3  | 669.2  | 708.4  | 717.5  | 772.1  | 797.8  |
| 882.4  | 902.8  | 931.5  | 982.8  | 1048.8 | 1078.9 | 1089.2 | 1131.4 | 1156.3 |
| 1186.7 | 1261.1 | 1275.5 | 1309.2 | 1324.6 | 1331.7 | 1351.5 | 1358.8 | 1399.0 |
| 1419.2 | 1423.1 | 1448.4 | 1455.3 | 1483.6 | 1488.8 | 1493.7 | 1509.1 | 1862.5 |
| 2940.8 | 3036.9 | 3040.6 | 3042.8 | 3067.9 | 3069.5 | 3074.8 | 3087.5 | 3095.5 |
| 3114.5 | 3159.7 | 3805.8 |        |        |        |        |        |        |

**(4)C<sub>6</sub>H<sub>13</sub>CHO****TS1**

|        |        |        |        |        |        |        |        |        |
|--------|--------|--------|--------|--------|--------|--------|--------|--------|
| -418.6 | 18.2   | 31.8   | 49.2   | 70.2   | 84.0   | 116.8  | 131.3  | 145.0  |
| 172.7  | 192.9  | 248.4  | 276.9  | 386.2  | 458.2  | 549.6  | 662.1  | 717.6  |
| 729.7  | 755.4  | 830.1  | 900.1  | 914.3  | 936.7  | 1006.6 | 1035.6 | 1069.1 |
| 1080.4 | 1092.1 | 1142.1 | 1149.8 | 1217.5 | 1242.6 | 1266.3 | 1278.8 | 1314.0 |
| 1316.4 | 1333.1 | 1337.8 | 1369.7 | 1404.9 | 1414.0 | 1417.2 | 1449.1 | 1487.8 |
| 1488.6 | 1496.8 | 1505.2 | 1506.7 | 1514.4 | 1874.6 | 2217.6 | 3034.5 | 3040.3 |
| 3051.5 | 3052.1 | 3058.9 | 3061.9 | 3069.9 | 3075.0 | 3081.7 | 3094.6 | 3114.6 |

**TS2**

|        |        |        |        |        |        |        |        |        |
|--------|--------|--------|--------|--------|--------|--------|--------|--------|
| -680.1 | 39.6   | 50.6   | 66.1   | 83.6   | 95.5   | 122.2  | 131.4  | 149.1  |
| 193.1  | 229.0  | 246.5  | 281.3  | 386.7  | 459.9  | 581.4  | 708.8  | 731.8  |
| 747.7  | 788.0  | 853.4  | 895.5  | 924.2  | 940.8  | 1013.0 | 1037.1 | 1070.8 |
| 1081.4 | 1092.0 | 1114.0 | 1151.1 | 1167.5 | 1210.0 | 1241.5 | 1250.4 | 1295.8 |
| 1310.9 | 1332.0 | 1335.5 | 1368.4 | 1406.0 | 1413.6 | 1416.5 | 1422.4 | 1480.2 |
| 1489.3 | 1494.0 | 1505.1 | 1505.3 | 1514.1 | 1520.9 | 1848.6 | 2969.6 | 3030.9 |
| 3040.0 | 3051.2 | 3054.4 | 3059.5 | 3064.3 | 3075.8 | 3080.6 | 3095.4 | 3113.8 |
| 3129.4 | 3136.9 | 3793.9 |        |        |        |        |        |        |

**TS3**

|        |        |        |        |        |        |        |        |        |
|--------|--------|--------|--------|--------|--------|--------|--------|--------|
| -756.9 | 42.7   | 58.2   | 73.6   | 90.9   | 134.4  | 146.3  | 164.0  | 171.7  |
| 209.1  | 247.0  | 277.1  | 383.4  | 418.0  | 458.0  | 658.9  | 673.7  | 718.0  |
| 737.1  | 788.8  | 850.7  | 900.6  | 924.4  | 938.7  | 1027.8 | 1040.5 | 1070.3 |
| 1088.7 | 1095.8 | 1114.6 | 1149.5 | 1175.4 | 1224.3 | 1252.4 | 1272.2 | 1301.0 |
| 1316.5 | 1329.7 | 1337.3 | 1369.8 | 1406.1 | 1414.9 | 1417.0 | 1422.1 | 1438.2 |
| 1461.6 | 1481.0 | 1492.0 | 1501.7 | 1504.7 | 1514.0 | 1852.4 | 2965.1 | 3023.1 |
| 3036.4 | 3041.7 | 3051.0 | 3059.6 | 3065.8 | 3067.3 | 3076.1 | 3097.1 | 3104.4 |
| 3129.9 | 3136.7 | 3762.1 |        |        |        |        |        |        |

**TS4**

|        |        |        |        |        |        |        |        |        |
|--------|--------|--------|--------|--------|--------|--------|--------|--------|
| -496.7 | 40.7   | 54.9   | 63.0   | 68.7   | 82.7   | 127.8  | 135.3  | 162.6  |
| 185.7  | 197.0  | 247.0  | 280.1  | 386.5  | 459.5  | 622.8  | 672.9  | 712.2  |
| 742.1  | 802.5  | 841.1  | 901.7  | 928.1  | 941.7  | 1011.3 | 1038.1 | 1077.9 |
| 1086.0 | 1094.5 | 1153.2 | 1161.4 | 1199.3 | 1225.4 | 1259.9 | 1279.6 | 1303.7 |
| 1316.8 | 1335.1 | 1357.8 | 1371.7 | 1406.3 | 1413.2 | 1417.3 | 1422.3 | 1458.2 |
| 1479.0 | 1489.1 | 1497.9 | 1505.3 | 1511.9 | 1660.3 | 1861.2 | 2944.3 | 3031.3 |
| 3041.8 | 3048.1 | 3060.0 | 3060.7 | 3061.4 | 3073.2 | 3076.2 | 3093.4 | 3111.2 |
| 3130.7 | 3138.3 | 3797.9 |        |        |        |        |        |        |

**TS5**

|        |        |        |        |        |        |        |        |        |
|--------|--------|--------|--------|--------|--------|--------|--------|--------|
| -525.4 | 31.5   | 56.5   | 64.5   | 78.5   | 86.6   | 119.5  | 140.1  | 158.6  |
| 182.3  | 198.5  | 252.0  | 280.0  | 388.7  | 462.0  | 634.4  | 671.3  | 710.2  |
| 752.1  | 776.7  | 852.2  | 903.3  | 930.6  | 947.2  | 1013.9 | 1041.4 | 1070.0 |
| 1086.5 | 1098.5 | 1151.8 | 1162.5 | 1215.0 | 1232.0 | 1254.8 | 1287.4 | 1305.6 |
| 1317.4 | 1332.7 | 1351.0 | 1377.2 | 1402.2 | 1413.2 | 1418.1 | 1422.5 | 1455.7 |
| 1478.7 | 1488.5 | 1502.7 | 1504.6 | 1511.3 | 1588.2 | 1862.4 | 2943.7 | 3028.9 |
| 3040.5 | 3041.1 | 3060.6 | 3061.6 | 3067.7 | 3071.4 | 3077.1 | 3090.2 | 3116.2 |
| 3132.6 | 3142.3 | 3794.8 |        |        |        |        |        |        |

**TS6**

|        |        |        |        |        |        |        |        |        |
|--------|--------|--------|--------|--------|--------|--------|--------|--------|
| -524.0 | 12.9   | 40.3   | 50.4   | 67.5   | 87.5   | 100.4  | 129.2  | 139.3  |
| 179.3  | 196.5  | 234.6  | 278.1  | 387.0  | 458.7  | 629.6  | 669.0  | 710.4  |
| 742.4  | 789.1  | 839.4  | 898.4  | 925.1  | 939.0  | 1019.6 | 1040.1 | 1075.0 |
| 1086.4 | 1096.7 | 1156.2 | 1165.4 | 1204.0 | 1228.2 | 1250.9 | 1282.4 | 1307.5 |
| 1327.0 | 1334.3 | 1362.4 | 1377.7 | 1404.8 | 1412.1 | 1419.5 | 1422.6 | 1454.9 |
| 1480.5 | 1491.8 | 1496.3 | 1499.7 | 1508.8 | 1629.5 | 1862.6 | 2939.4 | 3029.7 |
| 3039.0 | 3039.9 | 3055.4 | 3066.3 | 3068.2 | 3070.6 | 3079.5 | 3091.2 | 3114.6 |
| 3123.2 | 3142.5 | 3800.9 |        |        |        |        |        |        |

**TS7**

|        |        |        |        |        |        |        |        |        |
|--------|--------|--------|--------|--------|--------|--------|--------|--------|
| -752.6 | 30.9   | 46.8   | 67.7   | 91.8   | 99.1   | 117.9  | 138.4  | 156.3  |
| 182.8  | 195.0  | 281.2  | 323.3  | 387.6  | 461.2  | 670.0  | 710.0  | 725.9  |
| 751.4  | 793.0  | 842.4  | 892.3  | 917.7  | 939.9  | 1010.4 | 1036.5 | 1068.7 |
| 1082.4 | 1094.4 | 1129.9 | 1165.5 | 1184.9 | 1228.4 | 1254.7 | 1269.3 | 1305.0 |
| 1319.1 | 1332.0 | 1336.4 | 1351.3 | 1375.0 | 1408.4 | 1417.7 | 1422.1 | 1453.9 |
| 1456.0 | 1479.7 | 1489.3 | 1491.7 | 1497.0 | 1510.9 | 1862.9 | 2941.0 | 3033.8 |
| 3034.8 | 3039.8 | 3043.1 | 3065.2 | 3068.8 | 3071.1 | 3079.3 | 3090.4 | 3100.3 |
| 3114.9 | 3159.4 | 3803.0 |        |        |        |        |        |        |

**TS7'**

|        |        |        |        |        |        |        |        |        |
|--------|--------|--------|--------|--------|--------|--------|--------|--------|
| -704.0 | 26.6   | 39.9   | 61.5   | 68.4   | 80.1   | 93.6   | 131.6  | 142.3  |
| 180.1  | 201.3  | 255.5  | 334.9  | 390.2  | 450.4  | 669.1  | 705.9  | 713.1  |
| 731.6  | 762.4  | 841.0  | 911.1  | 932.5  | 975.2  | 1015.5 | 1033.2 | 1067.6 |
| 1081.6 | 1086.3 | 1118.2 | 1166.7 | 1215.2 | 1228.3 | 1254.5 | 1274.2 | 1302.9 |
| 1316.8 | 1329.3 | 1336.6 | 1338.2 | 1371.4 | 1402.0 | 1416.0 | 1422.4 | 1443.5 |
| 1455.9 | 1484.3 | 1488.4 | 1496.8 | 1501.3 | 1511.6 | 1863.0 | 2941.5 | 3036.0 |
| 3040.2 | 3044.5 | 3062.7 | 3065.1 | 3068.9 | 3071.3 | 3083.4 | 3088.6 | 3106.0 |
| 3115.4 | 3155.7 | 3807.1 |        |        |        |        |        |        |

**References**

1. Mendes, J.; Zhou, C.-W.; Curran, H. J., Theoretical Study of the Rate Constants for the Hydrogen Atom Abstraction Reactions of Esters with OH Radicals. *The Journal of Physical Chemistry A* **2014**, *118*, 4889-4899.
